# Supplementary material
Source: PubMed Central journal article supplement (PMC9484382)
Supplement: gutjnl-2021-324994supp005.pdf [file gutjnl-2021-324994supp005.pdf]

## Supplementary Figure 5

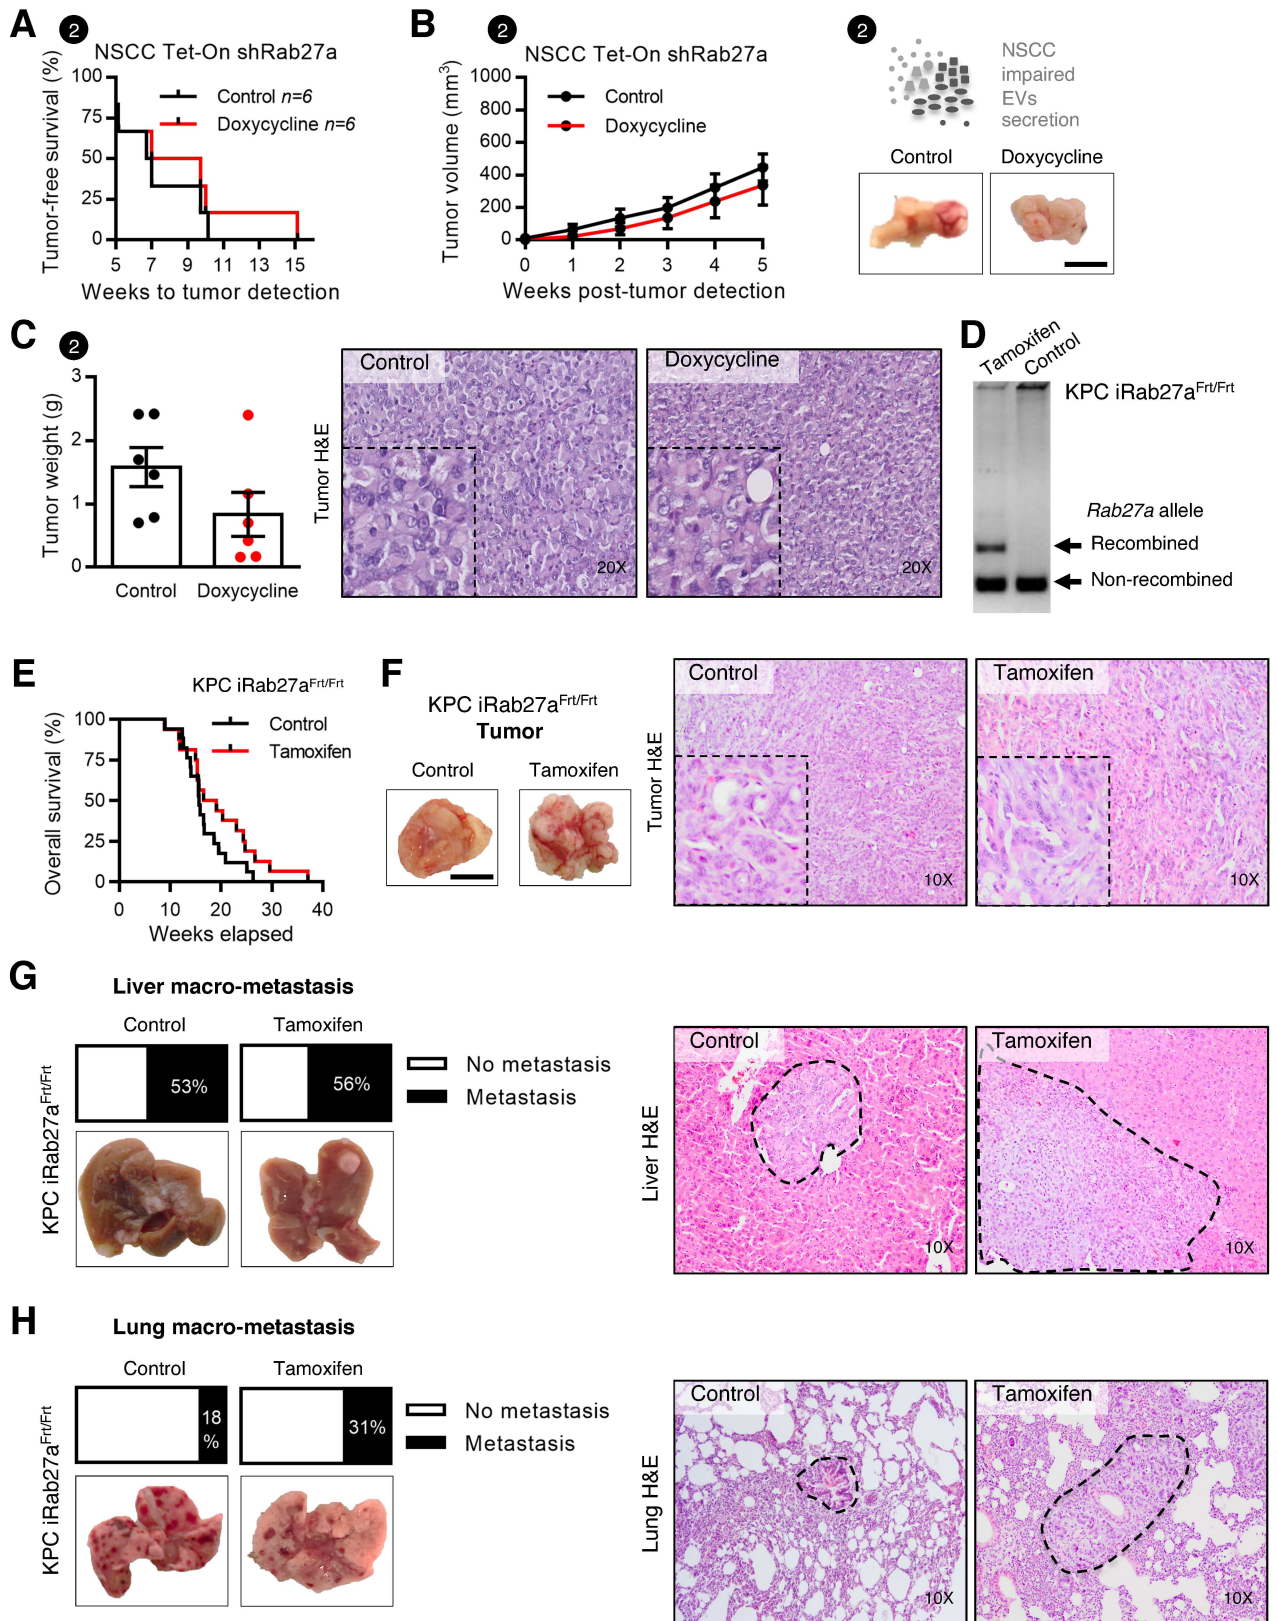

**Supplementary Figure 5 (related to Figure 4). Impairment of extracellular vesicles by NSCC does not impact PDAC progression in an orthotopic cell line model. (A)** Kaplan Meier curve represents the number of weeks to tumor detection of mice with NSCC proficient (NSCC Tet-On shRab27a Control=6 mice) and impaired EVs secretion (NSCC Tet-On shRab27a Doxycycline=6 mice; paired t-test). **(B)** Tumor growth curve measured by ultrasound of mice with NSCC proficient (NSCC Tet-On shRab27a Control=6 mice) and impaired EVs secretion (NSCC Tet-On shRab27a Doxycycline=6 mice; two-way anova). Representative photos of pancreas tumors (right). Scale bar 10mm. **(C)** Quantification of tumor weight of groups described in (A) and (B) (Wilcoxon test). Representative H&E stainings of pancreas tumors (right). **(D)** Representative photo of an agarose gel with the results of a PCR of the Rab27a<sup>FRT/FRT</sup> allele recombination in pancreatic tumors of KPC iRab27a<sup>Frt/Frt</sup>. **(E)** Kaplan Meier curve of the overall survival of the KPC iRab27a<sup>Frt/Frt</sup> model (control, KPC iRab27a<sup>Frt/Frt</sup> non-treated or KPC Rab27A<sup>Frt/Frt</sup> without the *R26<sup>LSL-FLPOERT2/+</sup>* allele treated with tamoxifen, n=17; KPC iRab27A<sup>Frt/Frt</sup> tamoxifen treated, n=16). **(F)** Representative tumor images (left) and H&E staining (right) of the KPC iRab27a<sup>Frt/Frt</sup> model (control, KPC iRab27A<sup>Frt/Frt</sup> non-treated and KPC iRab27A<sup>Frt/Frt</sup> tamoxifen treated – Rab27A KO). Scale bar 10mm. **(G)** Incidence of liver macro-metastasis in KPC iRab27a<sup>Frt/Frt</sup> model (control, KPC iRab27A<sup>Frt/Frt</sup> non-treated or KPC Rab27A<sup>Frt/Frt</sup> without the *R26<sup>LSL-FLPOERT2/+</sup>* allele treated with tamoxifen, n=17; KPC iRab27A<sup>Frt/Frt</sup> tamoxifen treated, n=16). Representative liver images (bottom) and H&E staining of macro-metastasis (right, dashed lines identify site of metastasis). **(H)** Incidence of lung macro-metastasis in KPC iRab27a<sup>Frt/Frt</sup> model (control, KPC iRab27A<sup>Frt/Frt</sup> non-treated or KPC Rab27A<sup>Frt/Frt</sup> without the *R26<sup>LSL-FLPOERT2/+</sup>* allele treated with tamoxifen, n=17; KPC iRab27A<sup>Frt/Frt</sup> tamoxifen treated, n=16). Representative lung images (bottom) and H&E staining of macro-metastasis (right, dashed lines identify sites of metastasis). Data are mean±SEM.
