# Supplementary material
Source: PubMed Central journal article supplement (PMC9484382)
Supplement: gutjnl-2021-324994supp011.pdf [file gutjnl-2021-324994supp011.pdf]

## Supplementary Figure 11

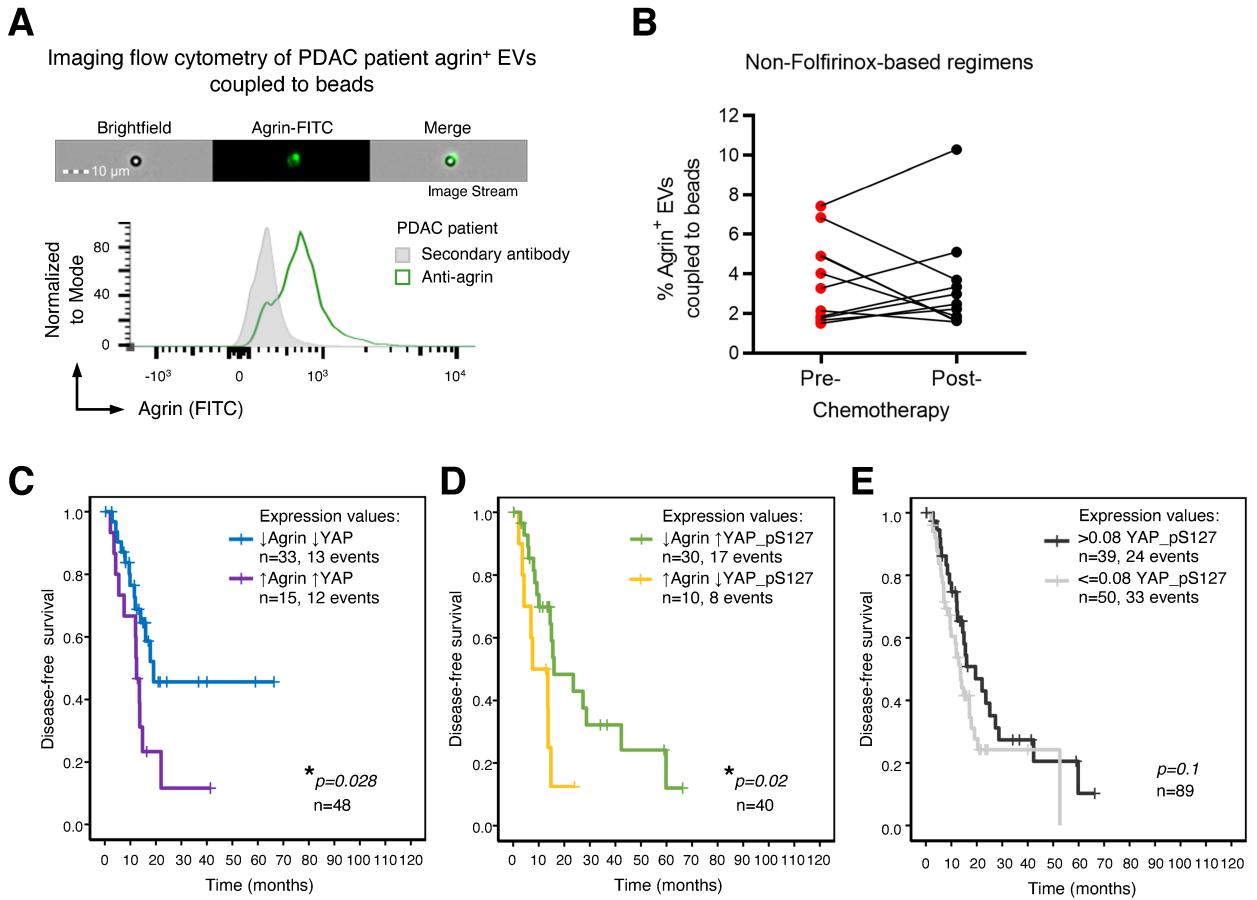

**Supplementary Figure 11 (related to Figure 8). Combination of Agrin and YAP levels correlates with worse prognosis in PDAC. (A)** Representative FACS and imaging flow cytometry analysis of agrin-positive EVs coupled to beads in the serum of PDAC patients. **(B)** Pre- and post-chemotherapy analysis of the percentage of circulating agrin-positive EVs coupled to beads in the serum of PDAC patients treated with non-folfinox-based regimens (n=11, paired t-test). **(C)** Kaplan-Meier curve of disease-free survival of PDAC patients showing high expression levels of agrin (RNA) and YAP (protein) (purple) or low levels of agrin and YAP (blue) (TCGA cohort of PDAC patients n=48, Log-Rank test \* $p=0.028$ ). **(D)** Kaplan-Meier curve of the disease-free survival of PDAC patients showing high expression of agrin and low phosphoS127 YAP (yellow) and vice-versa (green) (TCGA cohort of PDAC patients n=40, Log-Rank test \* $p=0.02$ ). **(E)** Kaplan-Meier curve of the disease-free survival of PDAC patients showing high expression of phosphoS127 YAP (black) or low (grey) (TCGA cohort of PDAC patients n=89, Log-Rank test  $p=0.1$ ).
