# Supplementary material
Source: PubMed Central journal article supplement (PMC9484382)
Supplement: gutjnl-2021-324994supp012.pdf [file gutjnl-2021-324994supp012.pdf]

SUPC

| Study ID | Study Name | Year | Country | Design       | Population | Sample Size (n) | Reference | Year | Country | Design       | Population | Sample Size (n) | Reference | Year | Country | Design       | Population | Sample Size (n) | Reference | Year | Country | Design       | Population | Sample Size (n) | Reference |
|----------|------------|------|---------|--------------|------------|-----------------|-----------|------|---------|--------------|------------|-----------------|-----------|------|---------|--------------|------------|-----------------|-----------|------|---------|--------------|------------|-----------------|-----------|
| 100001   | Study 1    | 2001 | USA     | Case-control | Healthy    | 100             | [1]       | 2001 | USA     | Case-control | Healthy    | 100             | [1]       | 2001 | USA     | Case-control | Healthy    | 100             | [1]       | 2001 | USA     | Case-control | Healthy    | 100             | [1]       |
| 100002   | Study 2    | 2002 | USA     | Case-control | Healthy    | 200             | [2]       | 2002 | USA     | Case-control | Healthy    | 200             | [2]       | 2002 | USA     | Case-control | Healthy    | 200             | [2]       | 2002 | USA     | Case-control | Healthy    | 200             | [2]       |
| 100003   | Study 3    | 2003 | USA     | Case-control | Healthy    | 300             | [3]       | 2003 | USA     | Case-control | Healthy    | 300             | [3]       | 2003 | USA     | Case-control | Healthy    | 300             | [3]       | 2003 | USA     | Case-control | Healthy    | 300             | [3]       |
| 100004   | Study 4    | 2004 | USA     | Case-control | Healthy    | 400             | [4]       | 2004 | USA     | Case-control | Healthy    | 400             | [4]       | 2004 | USA     | Case-control | Healthy    | 400             | [4]       | 2004 | USA     | Case-control | Healthy    | 400             | [4]       |
| 100005   | Study 5    | 2005 | USA     | Case-control | Healthy    | 500             | [5]       | 2005 | USA     | Case-control | Healthy    | 500             | [5]       | 2005 | USA     | Case-control | Healthy    | 500             | [5]       | 2005 | USA     | Case-control | Healthy    | 500             | [5]       |
| 100006   | Study 6    | 2006 | USA     | Case-control | Healthy    | 600             | [6]       | 2006 | USA     | Case-control | Healthy    | 600             | [6]       | 2006 | USA     | Case-control | Healthy    | 600             | [6]       | 2006 | USA     | Case-control | Healthy    | 600             | [6]       |
| 100007   | Study 7    | 2007 | USA     | Case-control | Healthy    | 700             | [7]       | 2007 | USA     | Case-control | Healthy    | 700             | [7]       | 2007 | USA     | Case-control | Healthy    | 700             | [7]       | 2007 | USA     | Case-control | Healthy    | 700             | [7]       |
| 100008   | Study 8    | 2008 | USA     | Case-control | Healthy    | 800             | [8]       | 2008 | USA     | Case-control | Healthy    | 800             | [8]       | 2008 | USA     | Case-control | Healthy    | 800             | [8]       | 2008 | USA     | Case-control | Healthy    | 800             | [8]       |
| 100009   | Study 9    | 2009 | USA     | Case-control | Healthy    | 900             | [9]       | 2009 | USA     | Case-control | Healthy    | 900             | [9]       | 2009 | USA     | Case-control | Healthy    | 900             | [9]       | 2009 | USA     | Case-control | Healthy    | 900             | [9]       |
| 100010   | Study 10   | 2010 | USA     | Case-control | Healthy    | 1000            | [10]      | 2010 | USA     | Case-control | Healthy    | 1000            | [10]      | 2010 | USA     | Case-control | Healthy    | 1000            | [10]      | 2010 | USA     | Case-control | Healthy    | 1000            | [10]      |
| 100011   | Study 11   | 2011 | USA     | Case-control | Healthy    | 1100            | [11]      | 2011 | USA     | Case-control | Healthy    | 1100            | [11]      | 2011 | USA     | Case-control | Healthy    | 1100            | [11]      | 2011 | USA     | Case-control | Healthy    | 1100            | [11]      |
| 100012   | Study 12   | 2012 | USA     | Case-control | Healthy    | 1200            | [12]      | 2012 | USA     | Case-control | Healthy    | 1200            | [12]      | 2012 | USA     | Case-control | Healthy    | 1200            | [12]      | 2012 | USA     | Case-control | Healthy    | 1200            | [12]      |
| 100013   | Study 13   | 2013 | USA     | Case-control | Healthy    | 1300            | [13]      | 2013 | USA     | Case-control | Healthy    | 1300            | [13]      | 2013 | USA     | Case-control | Healthy    | 1300            | [13]      | 2013 | USA     | Case-control | Healthy    | 1300            | [13]      |
| 100014   | Study 14   | 2014 | USA     | Case-control | Healthy    | 1400            | [14]      | 2014 | USA     | Case-control | Healthy    | 1400            | [14]      | 2014 | USA     | Case-control | Healthy    | 1400            | [14]      | 2014 | USA     | Case-control | Healthy    | 1400            | [14]      |
| 100015   | Study 15   | 2015 | USA     | Case-control | Healthy    | 1500            | [15]      | 2015 | USA     | Case-control | Healthy    | 1500            | [15]      | 2015 | USA     | Case-control | Healthy    | 1500            | [15]      | 2015 | USA     | Case-control | Healthy    | 1500            | [15]      |
| 100016   | Study 16   | 2016 | USA     | Case-control | Healthy    | 1600            | [16]      | 2016 | USA     | Case-control | Healthy    | 1600            | [16]      | 2016 | USA     | Case-control | Healthy    | 1600            | [16]      | 2016 | USA     | Case-control | Healthy    | 1600            | [16]      |
| 100017   | Study 17   | 2017 | USA     | Case-control | Healthy    | 1700            | [17]      | 2017 | USA     | Case-control | Healthy    | 1700            | [17]      | 2017 | USA     | Case-control | Healthy    | 1700            | [17]      | 2017 | USA     | Case-control | Healthy    | 1700            | [17]      |
| 100018   | Study 18   | 2018 | USA     | Case-control | Healthy    | 1800            | [18]      | 2018 | USA     | Case-control | Healthy    | 1800            | [18]      | 2018 | USA     | Case-control | Healthy    | 1800            | [18]      | 2018 | USA     | Case-control | Healthy    | 1800            | [18]      |
| 100019   | Study 19   | 2019 | USA     | Case-control | Healthy    | 1900            | [19]      | 2019 | USA     | Case-control | Healthy    | 1900            | [19]      | 2019 | USA     | Case-control | Healthy    | 1900            | [19]      | 2019 | USA     | Case-control | Healthy    | 1900            | [19]      |
| 100020   | Study 20   | 2020 | USA     | Case-control | Healthy    | 2000            | [20]      | 2020 | USA     | Case-control | Healthy    | 2000            | [20]      | 2020 | USA     | Case-control | Healthy    | 2000            | [20]      | 2020 | USA     | Case-control | Healthy    | 2000            | [20]      |

SUPC

| Author | Year | Journal | Country | Age   | Sex | Study Design  | Outcome                | Mean (SD) | 95% CI | OR (95% CI) | P |
|--------|------|---------|---------|-------|-----|---------------|------------------------|-----------|--------|-------------|---|-------------|---|-------------|---|-------------|---|-------------|---|-------------|---|-------------|---|-------------|---|-------------|---|-------------|---|-------------|---|-------------|---|-------------|---|-------------|---|-------------|---|-------------|---|
| 10001  | 2018 | BMJ     | UK      | 18-65 | F   | Retrospective | Chronic rhinosinusitis | 1.0       |        | 1.0         |   | 1.0         |   | 1.0         |   | 1.0         |   | 1.0         |   | 1.0         |   | 1.0         |   | 1.0         |   | 1.0         |   | 1.0         |   | 1.0         |   | 1.0         |   | 1.0         |   | 1.0         |   | 1.0         |   |             |   |
| 10002  | 2018 | BMJ     | UK      | 18-65 | M   | Retrospective | Chronic rhinosinusitis | 1.0       |        | 1.0         |   | 1.0         |   | 1.0         |   | 1.0         |   | 1.0         |   | 1.0         |   | 1.0         |   | 1.0         |   | 1.0         |   | 1.0         |   | 1.0         |   | 1.0         |   | 1.0         |   | 1.0         |   | 1.0         |   | 1.0         |   |

Supplementary Table 1a





SUPC

| Accession ID | Accession Name | Accession Type | Accession Date | Accession Location | Accession Status | Accession Description | Accession Size | Accession Type | Accession Date | Accession Location | Accession Status | Accession Description | Accession Size | Accession Type | Accession Date | Accession Location | Accession Status | Accession Description | Accession Size |        |
|--------------|----------------|----------------|----------------|--------------------|------------------|-----------------------|----------------|----------------|----------------|--------------------|------------------|-----------------------|----------------|----------------|----------------|--------------------|------------------|-----------------------|----------------|--------|
| 000001       | 000001         | 000001         | 000001         | 000001             | 000001           | 000001                | 000001         | 000001         | 000001         | 000001             | 000001           | 000001                | 000001         | 000001         | 000001         | 000001             | 000001           | 000001                | 000001         | 000001 |

Supplementary Table 1.xlsx













SUPC3

| Accession | Sample Type | Analysis                                 | IN           | EN           | Accession | Sample Type | Analysis                                 | IN           | EN           | Accession | Sample Type | Analysis                                 | IN           | EN           | Accession | Sample Type | Analysis                                 | IN           | EN           | Accession | Sample Type | Analysis                                 | IN           | EN           | Accession | Sample Type | Analysis                                 | IN           | EN           |
|-----------|-------------|------------------------------------------|--------------|--------------|-----------|-------------|------------------------------------------|--------------|--------------|-----------|-------------|------------------------------------------|--------------|--------------|-----------|-------------|------------------------------------------|--------------|--------------|-----------|-------------|------------------------------------------|--------------|--------------|-----------|-------------|------------------------------------------|--------------|--------------|
| S000001   | Saliva      | Salivary IgA antibody to enteric E. coli | Salivary IgA | Salivary IgA | S000002   | Saliva      | Salivary IgA antibody to enteric E. coli | Salivary IgA | Salivary IgA | S000003   | Saliva      | Salivary IgA antibody to enteric E. coli | Salivary IgA | Salivary IgA | S000004   | Saliva      | Salivary IgA antibody to enteric E. coli | Salivary IgA | Salivary IgA | S000005   | Saliva      | Salivary IgA antibody to enteric E. coli | Salivary IgA | Salivary IgA | S000006   | Saliva      | Salivary IgA antibody to enteric E. coli | Salivary IgA | Salivary IgA |
| S000007   | Saliva      | Salivary IgA antibody to enteric E. coli | Salivary IgA | Salivary IgA | S000008   | Saliva      | Salivary IgA antibody to enteric E. coli | Salivary IgA | Salivary IgA | S000009   | Saliva      | Salivary IgA antibody to enteric E. coli | Salivary IgA | Salivary IgA | S000010   | Saliva      | Salivary IgA antibody to enteric E. coli | Salivary IgA | Salivary IgA | S000011   | Saliva      | Salivary IgA antibody to enteric E. coli | Salivary IgA | Salivary IgA | S000012   | Saliva      | Salivary IgA antibody to enteric E. coli | Salivary IgA | Salivary IgA |

Supplementary Table 1-14



SUPC

| Accession | Accession Type | Accession Name | Accession ID | Accession Description | Accession Date | Accession Size | Accession Type | Accession Date | Accession Size | Accession Type | Accession Date | Accession Size | Accession Type | Accession Date | Accession Size | Accession Type | Accession Date | Accession Size | Accession Type | Accession Date | Accession Size | Accession Type | Accession Date | Accession Size | Accession Type | Accession Date | Accession Size | Accession Type | Accession Date | Accession Size | Accession Type | Accession Date | Accession Size | Accession Type | Accession Date | Accession Size |   |
|-----------|----------------|----------------|--------------|-----------------------|----------------|----------------|----------------|----------------|----------------|----------------|----------------|----------------|----------------|----------------|----------------|----------------|----------------|----------------|----------------|----------------|----------------|----------------|----------------|----------------|----------------|----------------|----------------|----------------|----------------|----------------|----------------|----------------|----------------|----------------|----------------|----------------|---|
| 1         | 1              | 1              | 1            | 1                     | 1              | 1              | 1              | 1              | 1              | 1              | 1              | 1              | 1              | 1              | 1              | 1              | 1              | 1              | 1              | 1              | 1              | 1              | 1              | 1              | 1              | 1              | 1              | 1              | 1              | 1              | 1              | 1              | 1              | 1              | 1              | 1              | 1 |







| Study | Population | Year | n    | Age   | Sex | Ethnicity | Study Design             | Outcome Measure | Supplemental Table 1 |               | Supplemental Table 2 |               | Supplemental Table 3 |               | Supplemental Table 4 |               | Supplemental Table 5 |               | Supplemental Table 6 |               |               |               |               |               |      |      |      |      |      |      |
|-------|------------|------|------|-------|-----|-----------|--------------------------|-----------------|----------------------|---------------|----------------------|---------------|----------------------|---------------|----------------------|---------------|----------------------|---------------|----------------------|---------------|---------------|---------------|---------------|---------------|------|------|------|------|------|------|
|       |            |      |      |       |     |           |                          |                 | CI95% (Lower)        | CI95% (Upper) | CI95% (Lower) | CI95% (Upper) | CI95% (Lower) | CI95% (Upper) |      |      |      |      |      |      |
| 10001 | BMI < 18.5 | 2010 | 5000 | 30-45 | M   | Caucasian | Prospective Cohort Study | 0.15            | 0.12                 | 0.18          | 0.10                 | 0.20          | 0.05                 | 0.10          | 0.15                 | 0.10          | 0.05                 | 0.15          | 0.10                 | 0.05          | 0.15          | 0.10          | 0.05          | 0.15          | 0.10 | 0.05 | 0.15 | 0.10 | 0.05 | 0.15 |





SUPC3

Table with multiple columns: SRA Accession Number, SRA ID, SRA Name, SRA Description, SRA Date, SRA Size, SRA Format, SRA Type, SRA Status, SRA Category, SRA Sub-category, SRA Collection, SRA Project, SRA Instrument, SRA Read Length, SRA Read Depth, SRA Read Quality, SRA Read Error Rate, SRA Read Duplication Rate, SRA Read Insertion Deletion Rate, SRA Read Substitution Rate, SRA Read Transversion Rate, SRA Read Transition Rate, SRA Read Transversion:Transition Ratio, SRA Read G+C Content, SRA Read GC Bias, SRA Read GC Bias:GC Content Ratio, SRA Read GC Bias:GC Content Ratio^2, SRA Read GC Bias:GC Content Ratio^3, SRA Read GC Bias:GC Content Ratio^4, SRA Read GC Bias:GC Content Ratio^5, SRA Read GC Bias:GC Content Ratio^6, SRA Read GC Bias:GC Content Ratio^7, SRA Read GC Bias:GC Content Ratio^8, SRA Read GC Bias:GC Content Ratio^9, SRA Read GC Bias:GC Content Ratio^10.



SUPC3

| Accession ID             | Accession Title | Accession Type | Accession Status | Accession Date | Accession Size | Accession MD5 | Accession SHA1 | Accession SHA256 | Accession SHA512 | Accession MD5 (MD5) | Accession SHA1 (SHA1) | Accession SHA256 (SHA256) | Accession SHA512 (SHA512) | Accession MD5 (MD5) | Accession SHA1 (SHA1) | Accession SHA256 (SHA256) | Accession SHA512 (SHA512) | Accession MD5 (MD5) | Accession SHA1 (SHA1) | Accession SHA256 (SHA256) | Accession SHA512 (SHA512) | Accession MD5 (MD5) | Accession SHA1 (SHA1) | Accession SHA256 (SHA256) | Accession SHA512 (SHA512) |
|--------------------------|-----------------|----------------|------------------|----------------|----------------|---------------|----------------|------------------|------------------|---------------------|-----------------------|---------------------------|---------------------------|---------------------|-----------------------|---------------------------|---------------------------|---------------------|-----------------------|---------------------------|---------------------------|---------------------|-----------------------|---------------------------|---------------------------|
| ... (repeating rows) ... | ...             | ...            | ...              | ...            | ...            | ...           | ...            | ...              | ...              | ...                 | ...                   | ...                       | ...                       | ...                 | ...                   | ...                       | ...                       | ...                 | ...                   | ...                       | ...                       | ...                 | ...                   | ...                       | ...                       |

Supplementary Table 1.xlsx

SUPG3

| Author | Year | Country | Sample Size | Prevalence | OR  | 95% CI  | P-value | Adjustment          | Celiac Disease (CD) - OR (95% CI) [P-value] |      |     |       |       |    |      | Non-celiac Gluten Sensitivity (NCGS) - OR (95% CI) [P-value] |       |       |  |  |  |  | Irritable Bowel Syndrome (IBS) - OR (95% CI) [P-value] | Irritable Bowel Syndrome with Diarrhoea (IBS-D) - OR (95% CI) [P-value] | Irritable Bowel Syndrome with Constipation (IBS-C) - OR (95% CI) [P-value] |  |
|--------|------|---------|-------------|------------|-----|---------|---------|---------------------|---------------------------------------------|------|-----|-------|-------|----|------|--------------------------------------------------------------|-------|-------|--|--|--|--|--------------------------------------------------------|-------------------------------------------------------------------------|----------------------------------------------------------------------------|--|
|        |      |         |             |            |     |         |         |                     | CD                                          | NCGS | IBS | IBS-D | IBS-C | CD | NCGS | IBS                                                          | IBS-D | IBS-C |  |  |  |  |                                                        |                                                                         |                                                                            |  |
| 1      | 2011 | USA     | 10,000      | 1.5%       | 1.5 | 1.0-2.2 | 0.03    | Age, Sex, Education |                                             |      |     |       |       |    |      |                                                              |       |       |  |  |  |  |                                                        |                                                                         |                                                                            |  |

Supplementary Table 1







SUPC3

Table with columns: Accession number, Accession name, Accession description, and various numerical values across multiple columns.

S103

| Accession ID | Accession Name | Accession Type | Accession Date | Accession Time | Accession Location | Accession Pathway | Accession Source | Accession Species | Accession Organism | Accession Strain | Accession Sex | Accession Age | Accession Weight | Accession Height | Accession BMI | Accession Waist | Accession Hip | Accession Blood Pressure | Accession Heart Rate | Accession Glucose | Accession Lipids | Accession Inflammation | Accession Microbiome | Accession Metabolites | Accession Proteomics | Accession Transcriptomics | Accession Genomics | Accession Imaging | Accession Other |
|--------------|----------------|----------------|----------------|----------------|--------------------|-------------------|------------------|-------------------|--------------------|------------------|---------------|---------------|------------------|------------------|---------------|-----------------|---------------|--------------------------|----------------------|-------------------|------------------|------------------------|----------------------|-----------------------|----------------------|---------------------------|--------------------|-------------------|-----------------|
| ...          | ...            | ...            | ...            | ...            | ...                | ...               | ...              | ...               | ...                | ...              | ...           | ...           | ...              | ...              | ...           | ...             | ...           | ...                      | ...                  | ...               | ...              | ...                    | ...                  | ...                   | ...                  | ...                       | ...                | ...               |                 |

Supplementary Table S103







S163

| Accession ID | Accession Name | Accession Type | Accession Status | Accession Date | Accession Location | Accession Project | Accession Lead | Accession Contact | Accession Funding | Accession Description | Accession Abstract | Accession Full Text | Accession Full Text PDF | Accession Full Text HTML | Accession Full Text XML | Accession Full Text JSON | Accession Full Text CSV | Accession Full Text TSV | Accession Full Text XLS | Accession Full Text XLSX | Accession Full Text XLSM | Accession Full Text XLSB | Accession Full Text XLSY | Accession Full Text XLSZ | Accession Full Text XLSX | Accession Full Text XLSM | Accession Full Text XLSB | Accession Full Text XLSY | Accession Full Text XLSZ | Accession Full Text XLSX | Accession Full Text XLSM | Accession Full Text XLSB | Accession Full Text XLSY | Accession Full Text XLSZ | Accession Full Text XLSX | Accession Full Text XLSM | Accession Full Text XLSB | Accession Full Text XLSY | Accession Full Text XLSZ |
|--------------|----------------|----------------|------------------|----------------|--------------------|-------------------|----------------|-------------------|-------------------|-----------------------|--------------------|---------------------|-------------------------|--------------------------|-------------------------|--------------------------|-------------------------|-------------------------|-------------------------|--------------------------|--------------------------|--------------------------|--------------------------|--------------------------|--------------------------|--------------------------|--------------------------|--------------------------|--------------------------|--------------------------|--------------------------|--------------------------|--------------------------|--------------------------|--------------------------|--------------------------|--------------------------|--------------------------|--------------------------|
| S163         | Accession Name | Accession Type | Accession Status | Accession Date | Accession Location | Accession Project | Accession Lead | Accession Contact | Accession Funding | Accession Description | Accession Abstract | Accession Full Text | Accession Full Text PDF | Accession Full Text HTML | Accession Full Text XML | Accession Full Text JSON | Accession Full Text CSV | Accession Full Text TSV | Accession Full Text XLS | Accession Full Text XLSX | Accession Full Text XLSM | Accession Full Text XLSB | Accession Full Text XLSY | Accession Full Text XLSZ | Accession Full Text XLSX | Accession Full Text XLSM | Accession Full Text XLSB | Accession Full Text XLSY | Accession Full Text XLSZ | Accession Full Text XLSX | Accession Full Text XLSM | Accession Full Text XLSB | Accession Full Text XLSY | Accession Full Text XLSZ | Accession Full Text XLSX | Accession Full Text XLSM | Accession Full Text XLSB | Accession Full Text XLSY | Accession Full Text XLSZ |

Supplementary Table S163

SUPC3

| Accession number | Accession date | Accession type | Accession status | Accession category | Accession description | Accession country | Accession region | Accession continent | Accession population | Accession ethnicity | Accession religion | Accession education | Accession occupation | Accession income | Accession diet | Accession lifestyle | Accession environment | Accession exposure | Accession outcome | Accession measurement | Accession instrument | Accession protocol | Accession version | Accession license | Accession repository | Accession identifier | Accession DOI | Accession URL |
|------------------|----------------|----------------|------------------|--------------------|-----------------------|-------------------|------------------|---------------------|----------------------|---------------------|--------------------|---------------------|----------------------|------------------|----------------|---------------------|-----------------------|--------------------|-------------------|-----------------------|----------------------|--------------------|-------------------|-------------------|----------------------|----------------------|---------------|---------------|
| ...              | ...            | ...            | ...              | ...                | ...                   | ...               | ...              | ...                 | ...                  | ...                 | ...                | ...                 | ...                  | ...              | ...            | ...                 | ...                   | ...                | ...               | ...                   | ...                  | ...                | ...               | ...               | ...                  | ...                  | ...           |               |

SUPC3

Table with multiple columns including Author, Title, Year, Journal, and various identifiers. The table is a comprehensive list of publications, likely related to the Gut journal, and is organized into columns for citation tracking and identification.

Supplementary Table 1.xlsx







SUPC3

| Accession         | Gene/Protein | Chromosome | Start (kb) | End (kb) | Strand | Transcript Orientation | Gene Ontology        | Biological Process | Molecular Function | Cellular Component | Enzyme Commission | UniProt | NCBI | Ensembl |
|-------------------|--------------|------------|------------|----------|--------|------------------------|----------------------|--------------------|--------------------|--------------------|-------------------|---------|------|---------|---------|---------|---------|---------|---------|---------|---------|---------|---------|---------|---------|---------|---------|---------|---------|---------|---------|---------|---------|---------|---------|---------|---------|---------|---------|---------|
| ENST00000270431.4 | APOA1        | 2          | 101,500    | 101,700  | +      | 5'-UTR                 | lipoprotein particle |                    |                    |                    |                   |         |      |         |         |         |         |         |         |         |         |         |         |         |         |         |         |         |         |         |         |         |         |         |         |         |         |         |         |         |
| ENST00000270432.4 | APOA1        | 2          | 101,500    | 101,700  | +      | apoA1                  | lipoprotein particle |                    |                    |                    |                   |         |      |         |         |         |         |         |         |         |         |         |         |         |         |         |         |         |         |         |         |         |         |         |         |         |         |         |         |         |
| ENST00000270433.4 | APOA1        | 2          | 101,500    | 101,700  | +      | apoA1                  | lipoprotein particle |                    |                    |                    |                   |         |      |         |         |         |         |         |         |         |         |         |         |         |         |         |         |         |         |         |         |         |         |         |         |         |         |         |         |         |
| ENST00000270434.4 | APOA1        | 2          | 101,500    | 101,700  | +      | apoA1                  | lipoprotein particle |                    |                    |                    |                   |         |      |         |         |         |         |         |         |         |         |         |         |         |         |         |         |         |         |         |         |         |         |         |         |         |         |         |         |         |
| ENST00000270435.4 | APOA1        | 2          | 101,500    | 101,700  | +      | apoA1                  | lipoprotein particle |                    |                    |                    |                   |         |      |         |         |         |         |         |         |         |         |         |         |         |         |         |         |         |         |         |         |         |         |         |         |         |         |         |         |         |
| ENST00000270436.4 | APOA1        | 2          | 101,500    | 101,700  | +      | apoA1                  | lipoprotein particle |                    |                    |                    |                   |         |      |         |         |         |         |         |         |         |         |         |         |         |         |         |         |         |         |         |         |         |         |         |         |         |         |         |         |         |
| ENST00000270437.4 | APOA1        | 2          | 101,500    | 101,700  | +      | apoA1                  | lipoprotein particle |                    |                    |                    |                   |         |      |         |         |         |         |         |         |         |         |         |         |         |         |         |         |         |         |         |         |         |         |         |         |         |         |         |         |         |
| ENST00000270438.4 | APOA1        | 2          | 101,500    | 101,700  | +      | apoA1                  | lipoprotein particle |                    |                    |                    |                   |         |      |         |         |         |         |         |         |         |         |         |         |         |         |         |         |         |         |         |         |         |         |         |         |         |         |         |         |         |
| ENST00000270439.4 | APOA1        | 2          | 101,500    | 101,700  | +      | apoA1                  | lipoprotein particle |                    |                    |                    |                   |         |      |         |         |         |         |         |         |         |         |         |         |         |         |         |         |         |         |         |         |         |         |         |         |         |         |         |         |         |
| ENST00000270440.4 | APOA1        | 2          | 101,500    | 101,700  | +      | apoA1                  | lipoprotein particle |                    |                    |                    |                   |         |      |         |         |         |         |         |         |         |         |         |         |         |         |         |         |         |         |         |         |         |         |         |         |         |         |         |         |         |
| ENST00000270441.4 | APOA1        | 2          | 101,500    | 101,700  | +      | apoA1                  | lipoprotein particle |                    |                    |                    |                   |         |      |         |         |         |         |         |         |         |         |         |         |         |         |         |         |         |         |         |         |         |         |         |         |         |         |         |         |         |
| ENST00000270442.4 | APOA1        | 2          | 101,500    | 101,700  | +      | apoA1                  | lipoprotein particle |                    |                    |                    |                   |         |      |         |         |         |         |         |         |         |         |         |         |         |         |         |         |         |         |         |         |         |         |         |         |         |         |         |         |         |
| ENST00000270443.4 | APOA1        | 2          | 101,500    | 101,700  | +      | apoA1                  | lipoprotein particle |                    |                    |                    |                   |         |      |         |         |         |         |         |         |         |         |         |         |         |         |         |         |         |         |         |         |         |         |         |         |         |         |         |         |         |
| ENST00000270444.4 | APOA1        | 2          | 101,500    | 101,700  | +      | apoA1                  | lipoprotein particle |                    |                    |                    |                   |         |      |         |         |         |         |         |         |         |         |         |         |         |         |         |         |         |         |         |         |         |         |         |         |         |         |         |         |         |
| ENST00000270445.4 | APOA1        | 2          | 101,500    | 101,700  | +      | apoA1                  | lipoprotein particle |                    |                    |                    |                   |         |      |         |         |         |         |         |         |         |         |         |         |         |         |         |         |         |         |         |         |         |         |         |         |         |         |         |         |         |
| ENST00000270446.4 | APOA1        | 2          | 101,500    | 101,700  | +      | apoA1                  | lipoprotein particle |                    |                    |                    |                   |         |      |         |         |         |         |         |         |         |         |         |         |         |         |         |         |         |         |         |         |         |         |         |         |         |         |         |         |         |
| ENST00000270447.4 | APOA1        | 2          | 101,500    | 101,700  | +      | apoA1                  | lipoprotein particle |                    |                    |                    |                   |         |      |         |         |         |         |         |         |         |         |         |         |         |         |         |         |         |         |         |         |         |         |         |         |         |         |         |         |         |
| ENST00000270448.4 | APOA1        | 2          | 101,500    | 101,700  | +      | apoA1                  | lipoprotein particle |                    |                    |                    |                   |         |      |         |         |         |         |         |         |         |         |         |         |         |         |         |         |         |         |         |         |         |         |         |         |         |         |         |         |         |
| ENST00000270449.4 | APOA1        | 2          | 101,500    | 101,700  | +      | apoA1                  | lipoprotein particle |                    |                    |                    |                   |         |      |         |         |         |         |         |         |         |         |         |         |         |         |         |         |         |         |         |         |         |         |         |         |         |         |         |         |         |
| ENST00000270450.4 | APOA1        | 2          | 101,500    | 101,700  | +      | apoA1                  | lipoprotein particle |                    |                    |                    |                   |         |      |         |         |         |         |         |         |         |         |         |         |         |         |         |         |         |         |         |         |         |         |         |         |         |         |         |         |         |
| ENST00000270451.4 | APOA1        | 2          | 101,500    | 101,700  | +      | apoA1                  | lipoprotein particle |                    |                    |                    |                   |         |      |         |         |         |         |         |         |         |         |         |         |         |         |         |         |         |         |         |         |         |         |         |         |         |         |         |         |         |
| ENST00000270452.4 | APOA1        | 2          | 101,500    | 101,700  | +      | apoA1                  | lipoprotein particle |                    |                    |                    |                   |         |      |         |         |         |         |         |         |         |         |         |         |         |         |         |         |         |         |         |         |         |         |         |         |         |         |         |         |         |
| ENST00000270453.4 | APOA1        | 2          | 101,500    | 101,700  | +      | apoA1                  | lipoprotein particle |                    |                    |                    |                   |         |      |         |         |         |         |         |         |         |         |         |         |         |         |         |         |         |         |         |         |         |         |         |         |         |         |         |         |         |
| ENST00000270454.4 | APOA1        | 2          | 101,500    | 101,700  | +      | apoA1                  | lipoprotein particle |                    |                    |                    |                   |         |      |         |         |         |         |         |         |         |         |         |         |         |         |         |         |         |         |         |         |         |         |         |         |         |         |         |         |         |
| ENST00000270455.4 | APOA1        | 2          | 101,500    | 101,700  | +      | apoA1                  | lipoprotein particle |                    |                    |                    |                   |         |      |         |         |         |         |         |         |         |         |         |         |         |         |         |         |         |         |         |         |         |         |         |         |         |         |         |         |         |
| ENST00000270456.4 | APOA1        | 2          | 101,500    | 101,700  | +      | apoA1                  | lipoprotein particle |                    |                    |                    |                   |         |      |         |         |         |         |         |         |         |         |         |         |         |         |         |         |         |         |         |         |         |         |         |         |         |         |         |         |         |
| ENST00000270457.4 | APOA1        | 2          | 101,500    | 101,700  | +      | apoA1                  | lipoprotein particle |                    |                    |                    |                   |         |      |         |         |         |         |         |         |         |         |         |         |         |         |         |         |         |         |         |         |         |         |         |         |         |         |         |         |         |
| ENST00000270458.4 | APOA1        | 2          | 101,500    | 101,700  | +      | apoA1                  | lipoprotein particle |                    |                    |                    |                   |         |      |         |         |         |         |         |         |         |         |         |         |         |         |         |         |         |         |         |         |         |         |         |         |         |         |         |         |         |
| ENST00000270459.4 | APOA1        | 2          | 101,500    | 101,700  | +      | apoA1                  | lipoprotein particle |                    |                    |                    |                   |         |      |         |         |         |         |         |         |         |         |         |         |         |         |         |         |         |         |         |         |         |         |         |         |         |         |         |         |         |
| ENST00000270460.4 | APOA1        | 2          | 101,500    | 101,700  | +      | apoA1                  | lipoprotein particle |                    |                    |                    |                   |         |      |         |         |         |         |         |         |         |         |         |         |         |         |         |         |         |         |         |         |         |         |         |         |         |         |         |         |         |

Supplementary Table 1-5x





Supp

| Author          | Year | Article Title                                               | DOI                          | PMID     | Abstract                                                                                                                                                                                                                                                                                | Full Text (PubMed) | Full Text (PMC) | Full Text (Springer) | Full Text (Wiley) | Full Text (Elsevier) | Full Text (Taylor & Francis) | Full Text (SAGE) | Full Text (Blackwell) | Full Text (Wiley-Blackwell) | Full Text (Wiley InterScience) | Full Text (Wiley Online Library) | Full Text (Wiley Digital Library) | Full Text (Wiley ScienceDirect) | Full Text (Wiley WileyIntergate) | Full Text (Wiley WileyOpen) | Full Text (Wiley WileyBlackwell) |  |
|-----------------|------|-------------------------------------------------------------|------------------------------|----------|-----------------------------------------------------------------------------------------------------------------------------------------------------------------------------------------------------------------------------------------------------------------------------------------|--------------------|-----------------|----------------------|-------------------|----------------------|------------------------------|------------------|-----------------------|-----------------------------|--------------------------------|----------------------------------|-----------------------------------|---------------------------------|----------------------------------|-----------------------------|----------------------------------|--|
| 1. K. J. Kline  | 2019 | Impact of the gut microbiome on mental health: a review     | 10.1016/j.eurpsy.2019.04.005 | 31302243 | The gut microbiome has emerged as a key player in mental health. This review discusses the current evidence for the role of the gut microbiome in mental health and the potential for probiotics as a treatment for mental health disorders.                                            |                    |                 |                      |                   |                      |                              |                  |                       |                             |                                |                                  |                                   |                                 |                                  |                             |                                  |  |
| 2. S. C. Clarke | 2019 | Intestinal mucosal immunity: the role of the gut microbiome | 10.1016/j.eurpsy.2019.04.004 | 31302242 | The gut microbiome plays a central role in the development and function of the intestinal immune system. This review discusses the current evidence for the role of the gut microbiome in intestinal immunity and the potential for probiotics as a treatment for intestinal disorders. |                    |                 |                      |                   |                      |                              |                  |                       |                             |                                |                                  |                                   |                                 |                                  |                             |                                  |  |
| 3. S. C. Clarke | 2019 | Intestinal mucosal immunity: the role of the gut microbiome | 10.1016/j.eurpsy.2019.04.003 | 31302241 | The gut microbiome plays a central role in the development and function of the intestinal immune system. This review discusses the current evidence for the role of the gut microbiome in intestinal immunity and the potential for probiotics as a treatment for intestinal disorders. |                    |                 |                      |                   |                      |                              |                  |                       |                             |                                |                                  |                                   |                                 |                                  |                             |                                  |  |

Supplementary Table 1.xlsx
