# Supplementary material
Source: PubMed Central journal article supplement (PMC9484382)
Supplement: gutjnl-2021-324994supp014.pdf [file gutjnl-2021-324994supp014.pdf]

| Cluster | ID    | Description                                                                                                                      | GeneRatio | HitRatio  | pvalue      | p.adjust    | qvalue      | Count |
|---------|-------|----------------------------------------------------------------------------------------------------------------------------------|-----------|-----------|-------------|-------------|-------------|-------|
| 1       | Cells | R-HSA-72766 Translation                                                                                                          | 128/1008  | 291/10723 | 2.85268E-56 | 2.78422E-53 | 1.8047E-53  | 128   |
| 2       | Cells | R-HSA-72163 mRNA Splicing - Major Pathway                                                                                        | 96/1008   | 181/10723 | 2.53062E-51 | 1.23494E-48 | 8.00476E-49 | 96    |
| 3       | Cells | R-HSA-72172 mRNA Splicing                                                                                                        | 96/1008   | 189/10723 | 4.22204E-49 | 1.73757E-46 | 8.90333E-47 | 96    |
| 4       | Cells | R-HSA-72203 Processing of Capped Intron-Containing Pre-mRNA                                                                      | 107/1008  | 241/10723 | 1.92336E-47 | 4.69299E-45 | 3.04194E-45 | 107   |
| 5       | Cells | R-HSA-9010553 Regulation of expression of SLTs and ROBOs                                                                         | 81/1008   | 170/10723 | 8.51564E-39 | 1.5912E-36  | 1.0314E-36  | 81    |
| 6       | Cells | R-HSA-376176 Signaling by ROBO receptor                                                                                          | 89/1008   | 216/10723 | 2.40292E-36 | 3.00876E-34 | 2.53361E-34 | 89    |
| 7       | Cells | R-HSA-72613 Eukaryotic Translation Initiation                                                                                    | 64/1008   | 119/10723 | 6.7786E-35  | 8.2699E-33  | 5.36045E-33 | 64    |
| 8       | Cells | R-HSA-72737 Cap-dependent Translation Initiation                                                                                 | 64/1008   | 119/10723 | 6.7786E-35  | 8.2699E-33  | 5.36045E-33 | 64    |
| 9       | Cells | R-HSA-72705 GTP hydrolysis and joining of the 60S ribosomal subunit                                                              | 62/1008   | 112/10723 | 8.06694E-35 | 8.74815E-33 | 5.67045E-33 | 62    |
| 10      | Cells | R-HSA-725687 L13-8 mediated translational silencing of Ceruloplasmin expression                                                  | 61/1008   | 111/10723 | 5.01135E-34 | 4.89108E-32 | 3.17034E-32 | 61    |
| 11      | Cells | R-HSA-927802 Nonsense-Mediated Decay (NMD)                                                                                       | 62/1008   | 115/10723 | 6.45753E-34 | 5.25212E-32 | 3.40436E-32 | 62    |
| 12      | Cells | R-HSA-975957 Nonsense Mediated Decay (NMD) enhanced by the Exon Junction Complex (EJC)                                           | 62/1008   | 115/10723 | 6.45753E-34 | 5.25212E-32 | 3.40436E-32 | 62    |
| 13      | Cells | R-HSA-975956 Nonsense Mediated Decay (NMD) independent of the Exon Junction Complex (EJC)                                        | 56/1008   | 95/10723  | 1.51006E-33 | 1.13371E-31 | 7.34855E-32 | 56    |
| 14      | Cells | R-HSA-72764 Eukaryotic Translation Termination                                                                                   | 55/1008   | 93/10723  | 4.52228E-33 | 3.15288E-31 | 2.04353E-31 | 55    |
| 15      | Cells | R-HSA-72689 Formation of a pool of free 40S subunits                                                                             | 56/1008   | 101/10723 | 1.35284E-31 | 8.80245E-30 | 5.70564E-30 | 56    |
| 16      | Cells | R-HSA-71291 Metabolism of amino acids and derivatives                                                                            | 113/1008  | 371/10723 | 1.53523E-31 | 9.3649E-30  | 6.07022E-30 | 113   |
| 17      | Cells | R-HSA-156842 Eukaryotic Translation Elongation                                                                                   | 53/1008   | 93/10723  | 8.90826E-31 | 5.11439E-29 | 3.31509E-29 | 53    |
| 18      | Cells | R-HSA-1799319 SRP-dependent cotranslational protein targeting to membrane                                                        | 58/1008   | 112/10723 | 1.55374E-30 | 8.24744E-29 | 5.46082E-29 | 58    |
| 19      | Cells | R-HSA-156902 Peptide chain elongation                                                                                            | 51/1008   | 89/10723  | 8.14662E-30 | 3.97555E-28 | 2.57691E-28 | 51    |
| 20      | Cells | R-HSA-192823 Viral RNA Translation                                                                                               | 51/1008   | 89/10723  | 8.14662E-30 | 3.97555E-28 | 2.57691E-28 | 51    |
| 21      | Cells | R-HSA-2408557 Selenocysteine synthesis                                                                                           | 52/1008   | 93/10723  | 1.16958E-29 | 5.43576E-28 | 3.23398E-28 | 52    |
| 22      | Cells | R-HSA-2408522 Selenoamino acid metabolism                                                                                        | 58/1008   | 117/10723 | 3.28308E-29 | 1.56569E-27 | 9.44083E-28 | 58    |
| 23      | Cells | R-HSA-168255 Influenza Infection                                                                                                 | 66/1008   | 155/10723 | 3.66392E-28 | 1.55478E-26 | 1.00779E-26 | 66    |
| 24      | Cells | R-HSA-168273 Influenza Viral RNA Transcription and Replication                                                                   | 61/1008   | 135/10723 | 7.76179E-28 | 3.15646E-26 | 2.04598E-26 | 61    |
| 25      | Cells | R-HSA-9633012 Response of EIF2AK4 (GCN2) to amino acid deficiency                                                                | 51/1008   | 101/10723 | 2.64315E-26 | 1.03188E-24 | 6.68855E-25 | 51    |
| 26      | Cells | R-HSA-128517 The citric acid (TCA) cycle and respiratory electron transport                                                      | 64/1008   | 178/10723 | 1.68441E-26 | 6.32031E-24 | 4.09852E-24 | 64    |
| 27      | Cells | R-HSA-8868773 RNA processing in the nucleus and cytosol                                                                          | 65/1008   | 192/10723 | 3.36417E-21 | 1.27609E-19 | 7.88252E-20 | 65    |
| 28      | Cells | R-HSA-72312 rRNA processing                                                                                                      | 66/1008   | 202/10723 | 1.47655E-20 | 5.14684E-19 | 3.33612E-19 | 66    |
| 29      | Cells | R-HSA-9711097 Cellular response to starvation                                                                                    | 56/1008   | 156/10723 | 8.40443E-20 | 2.90795E-18 | 1.8849E-18  | 56    |
| 30      | Cells | R-HSA-6791262 Major pathway of RNA processing in the nucleus and cytosol                                                         | 61/1008   | 182/10723 | 1.03213E-19 | 3.76551E-18 | 2.17652E-18 | 61    |
| 31      | Cells | R-HSA-163200 Respiratory electron transport, ATP synthesis by chemiosmotic coupling, and heat production by uncoupling proteins. | 48/1008   | 127/10723 | 3.35928E-18 | 1.05763E-16 | 6.85543E-17 | 48    |
| 32      | Cells | R-HSA-8873719 RAB geranylgeranylation                                                                                            | 33/1008   | 64/10723  | 8.07176E-18 | 2.46189E-16 | 1.59577E-16 | 33    |
| 33      | Cells | R-HSA-73856 RNA Polymerase II Transcription Termination                                                                          | 33/1008   | 66/10723  | 2.7243E-17  | 8.05733E-16 | 5.22267E-16 | 33    |
| 34      | Cells | R-HSA-72662 Activation of the mRNA upon binding of the cap-binding complex and eIFs, and subsequent binding to 43S               | 31/1008   | 59/10723  | 3.97965E-17 | 1.14239E-15 | 7.40485E-16 | 31    |
| 35      | Cells | R-HSA-72663 Translation initiation complex formation                                                                             | 30/1008   | 58/10723  | 2.28747E-16 | 6.20159E-15 | 4.01978E-15 | 30    |
| 36      | Cells | R-HSA-72702 Ribosomal scanning and start codon recognition                                                                       | 30/1008   | 58/10723  | 2.28747E-16 | 6.20159E-15 | 4.01978E-15 | 30    |
| 37      | Cells | R-HSA-6798695 Neurotrophil degradation                                                                                           | 100/1008  | 474/10723 | 2.70259E-15 | 7.12899E-14 | 4.62093E-14 | 100   |
| 38      | Cells | R-HSA-72187 mRNA 3'-end processing                                                                                               | 28/1008   | 57/10723  | 1.28811E-14 | 3.3084E-13  | 2.14447E-13 | 28    |
| 39      | Cells | R-HSA-3398040 Mitochondrial translation elongation                                                                               | 34/1008   | 93/10723  | 8.00336E-14 | 2.25316E-12 | 1.46047E-12 | 34    |
| 40      | Cells | R-HSA-5368287 Mitochondrial translation                                                                                          | 35/1008   | 93/10723  | 1.47147E-14 | 3.59103E-12 | 2.32767E-12 | 35    |
| 41      | Cells | R-HSA-611105 Respiratory electron transport                                                                                      | 37/1008   | 103/10723 | 1.61188E-13 | 3.83705E-12 | 2.48713E-12 | 37    |
| 42      | Cells | R-HSA-72695 Formation of the ternary complex, and subsequently, the 43S complex                                                  | 25/1008   | 53/10723  | 3.64074E-13 | 8.46039E-12 | 5.48392E-12 | 25    |
| 43      | Cells | R-HSA-5419276 Mitochondrial translation termination                                                                              | 32/1008   | 87/10723  | 5.86762E-13 | 1.28642E-11 | 8.3384E-12  | 32    |
| 44      | Cells | R-HSA-5368286 Mitochondrial translation initiation                                                                               | 32/1008   | 87/10723  | 3.98911E-12 | 7.5763E-11  | 4.8858E-11  | 32    |
| 45      | Cells | R-HSA-9711123 Cellular response to chemical stress                                                                               | 45/1008   | 158/10723 | 4.98529E-12 | 1.08125E-10 | 7.00856E-11 | 45    |
| 46      | Cells | R-HSA-450531 Regulation of mRNA stability by proteins that bind AU-rich elements                                                 | 30/1008   | 86/10723  | 7.56907E-11 | 1.60596E-09 | 1.04096E-09 | 30    |
| 47      | Cells | R-HSA-809505 Gene and protein expression by JAK-STAT signaling after Interleukin-12 stimulation                                  | 47/1008   | 191/10723 | 8.94855E-11 | 1.86241E-09 | 1.20719E-09 | 47    |
| 48      | Cells | R-HSA-450408 AUFS (hnRNP D0) binds and destabilizes mRNA                                                                         | 23/1008   | 54/10723  | 1.19381E-11 | 2.24741E-09 | 1.57342E-09 | 23    |
| 49      | Cells | R-HSA-159236 Transport of Mature mRNA derived from an Intron-Containing Transcript                                               | 27/1008   | 73/10723  | 1.45038E-10 | 2.88892E-09 | 1.87256E-09 | 27    |
| 50      | Cells | R-HSA-162906 HIV Infection                                                                                                       | 54/1008   | 232/10723 | 2.01114E-10 | 3.92575E-09 | 2.54463E-09 | 54    |
| 51      | Cells | R-HSA-72165 mRNA Splicing - Minor Pathway                                                                                        | 23/1008   | 51/10723  | 3.55140E-10 | 6.79589E-09 | 4.40546E-09 | 23    |
| 52      | Cells | R-HSA-72202 Transport of Mature Transcript to Cytoplasm                                                                          | 28/1008   | 82/10723  | 5.75357E-10 | 1.07649E-08 | 6.97765E-09 | 28    |
| 53      | Cells | R-HSA-9020591 Interleukin-12 signaling                                                                                           | 20/1008   | 46/10723  | 1.2587E-09  | 2.31791E-08 | 1.50244E-08 | 20    |
| 54      | Cells | R-HSA-1158372 Downstream signaling events of B Cell Receptor (BCR)                                                               | 27/1008   | 80/10723  | 1.56622E-09 | 2.8308E-08  | 1.83489E-08 | 27    |
| 55      | Cells | R-HSA-893239 ROS sensing by NF- $\kappa$ B                                                                                       | 56/1008   | 160/10723 | 1.94749E-09 | 3.45558E-08 | 2.24007E-08 | 56    |
| 56      | Cells | R-HSA-9609507 Protein localization                                                                                               | 41/1008   | 163/10723 | 2.80234E-09 | 4.88408E-08 | 3.1658E-08  | 41    |
| 57      | Cells | R-HSA-379716 Cytosolic tRNA aminoacylation                                                                                       | 14/1008   | 24/10723  | 3.07585E-09 | 5.26673E-08 | 3.41383E-08 | 14    |
| 58      | Cells | R-HSA-180855 Apoptosis                                                                                                           | 21/1008   | 53/10723  | 3.78305E-09 | 6.46959E-08 | 4.12634E-08 | 21    |
| 59      | Cells | R-HSA-105981 Apoptosis                                                                                                           | 43/1008   | 178/10723 | 4.36398E-09 | 7.21906E-08 | 4.67931E-08 | 43    |
| 60      | Cells | R-HSA-162909 Host Interactions of HIV factors                                                                                    | 35/1008   | 129/10723 | 4.80727E-09 | 7.9231E-08  | 5.15315E-08 | 35    |
| 61      | Cells | R-HSA-9707587 Regulation of HMOX1 expression and activity                                                                        | 23/1008   | 64/10723  | 6.42794E-09 | 1.02847E-07 | 6.66643E-08 | 23    |
| 62      | Cells | R-HSA-5357801 Programmed Cell Death                                                                                              | 47/1008   | 207/10723 | 7.15771E-09 | 1.12676E-07 | 7.30335E-08 | 47    |
| 63      | Cells | R-HSA-180534 Ypu mediated degradation of CD4                                                                                     | 20/1008   | 51/10723  | 1.10077E-09 | 1.70531E-07 | 1.10537E-07 | 20    |
| 64      | Cells | R-HSA-447115 Interleukin-12 family signaling                                                                                     | 21/1008   | 56/10723  | 1.21686E-08 | 1.85572E-07 | 1.20285E-07 | 21    |
| 65      | Cells | R-HSA-1236974 ER-Phagosome pathway                                                                                               | 27/1008   | 89/10723  | 1.23914E-08 | 3.16669E-07 | 2.05261E-07 | 27    |
| 66      | Cells | R-HSA-1236978 Cross-presentation of soluble exogenous antigens (endosomes)                                                       | 19/1008   | 48/10723  | 2.14141E-08 | 3.16669E-07 | 2.05261E-07 | 19    |
| 67      | Cells | R-HSA-9554050 FBX17 down-regulates AuroraB signaling during mitotic entry and in early mitosis                                   | 20/1008   | 53/10723  | 2.89227E-08 | 4.4336E-07  | 2.22562E-07 | 20    |
| 68      | Cells | R-HSA-9604323 Negative regulation of NOTCH4 signaling                                                                            | 20/1008   | 53/10723  | 2.89227E-08 | 4.4336E-07  | 2.22562E-07 | 20    |
| 69      | Cells | R-HSA-351202 Metabolism of polyamines                                                                                            | 21/1008   | 58/10723  | 2.51433E-08 | 3.53578E-07 | 2.29185E-07 | 21    |
| 70      | Cells | R-HSA-3858494 Beta-catenin independent WNT signaling                                                                             | 36/1008   | 143/10723 | 2.53591E-08 | 3.53578E-07 | 2.29185E-07 | 36    |
| 71      | Cells | R-HSA-21133 Regulation of activated RAS p33 by p19                                                                               | 49/1008   | 190/10723 | 3.15228E-08 | 4.38826E-07 | 2.84442E-07 | 49    |
| 72      | Cells | R-HSA-174113 SCF-beta-TCP mediated degradation of Emi1                                                                           | 20/1008   | 54/10723  | 3.46725E-08 | 4.62093E-07 | 2.99523E-07 | 20    |
| 73      | Cells | R-HSA-8941858 Regulation of RUNX3 expression and activity                                                                        | 20/1008   | 54/10723  | 3.46725E-08 | 4.62093E-07 | 2.99523E-07 | 20    |
| 74      | Cells | R-HSA-1268020 Mitochondrial protein import                                                                                       | 22/1008   | 64/10723  | 3.50357E-08 | 4.62093E-07 | 2.99523E-07 | 22    |
| 75      | Cells | R-HSA-505062 Regulation of ornithine decarboxylase [ODC]                                                                         | 19/1008   | 50/10723  | 4.69943E-08 | 6.11552E-07 | 3.96401E-07 | 19    |
| 76      | Cells | R-HSA-5362768 Hb mutants are degraded by ERAD                                                                                    | 20/1008   | 55/10723  | 4.97221E-08 | 6.38537E-07 | 4.13892E-07 | 20    |
| 77      | Cells | R-HSA-9707564 Cytoprotection by HMOX1                                                                                            | 32/1008   | 122/10723 | 5.33421E-08 | 6.76129E-07 | 4.38259E-07 | 32    |
| 78      | Cells | R-HSA-195253 Autodegradation of beta-catenin by the destruction complex                                                          | 25/1008   | 82/10723  | 6.37211E-08 | 7.9733E-07  | 5.1682E-07  | 25    |
| 79      | Cells | R-HSA-349425 Autodegradation of the E3 ubiquitin ligase COP1                                                                     | 19/1008   | 51/10723  | 6.83613E-08 | 8.03863E-07 | 5.21054E-07 | 19    |
| 80      | Cells | R-HSA-69601 Ubiquitin-Mediated Degradation of Phosphorylated Cdc25A                                                              | 19/1008   | 51/10723  | 6.83613E-08 | 8.03863E-07 | 5.21054E-07 | 19    |
| 81      | Cells | R-HSA-69610 p53-independent DNA Damage Response                                                                                  | 19/1008   | 51/10723  | 6.83613E-08 | 8.03863E-07 | 5.21054E-07 | 19    |
| 82      | Cells | R-HSA-69613 p53-independent G1/S DNA damage checkpoint                                                                           | 19/1008   | 51/10723  | 6.83613E-08 | 8.03863E-07 | 5.21054E-07 | 19    |
| 83      | Cells | R-HSA-75815 Ubiquitin-dependent degradation of Cyclin D                                                                          | 19/1008   | 51/10723  | 6.83613E-08 | 8.03863E-07 | 5.21054E-07 | 19    |
| 84      | Cells | R-HSA-5687128 MAPK6/MapK4 signaling                                                                                              | 26/1008   | 80/10723  | 7.10315E-08 | 8.75319E-07 | 5.34962E-07 | 26    |
| 85      | Cells | R-HSA-5658442 Regulation of RAS by GAPs                                                                                          | 22/1008   | 67/10723  | 8.98253E-08 | 1.03141E-06 | 6.68545E-07 | 22    |
| 86      | Cells | R-HSA-169911 Regulation of Apoptosis                                                                                             | 19/1008   | 52/10723  | 9.83228E-08 | 1.11328E-06 | 7.21614E-07 | 19    |
| 87      | Cells | R-HSA-6791918 Complex biogenesis                                                                                                 | 20/1008   | 57/10723  | 9.9237E-08  | 1.11328E-06 | 7.21614E-07 | 20    |
| 88      | Cells | R-HSA-71403 Citric acid cycle (TCA cycle)                                                                                        | 121/1008  | 310/10723 | 1.1847E-07  | 1.31413E-06 | 8.51803E-07 | 121   |
| 89      | Cells | R-HSA-8948751 Regulation of PTEN stability and activity                                                                          | 22/1008   | 68/10723  | 1.21151E-07 | 1.32858E-06 | 8.61169E-07 | 22    |
| 90      | Cells | R-HSA-5387390 Hb mutants abrogate ligand secretion                                                                               | 20/1008   | 58/10723  | 1.38234E-07 | 1.48259E-06 | 9.60999E-07 | 20    |
| 91      | Cells | R-HSA-5676590 NIK-noncanonical NF- $\kappa$ B signaling                                                                          | 20/1008   | 58/10723  | 1.38234E-07 | 1.48259E-06 | 9.60999E-07 | 20    |
| 92      | Cells | R-HSA-5607764 CLEC7A (Dectin-1) signaling                                                                                        | 19/1008   | 51/10723  | 1.5649E-07  | 1.66185E-06 | 1.07719E-06 | 19    |
| 93      | Cells | R-HSA-983705 Signaling by the B Cell Receptor (BCR)                                                                              | 29/1008   | 109/10723 | 1.66395E-07 | 1.68329E-06 | 1.09109E-06 | 29    |
| 94      | Cells | R-HSA-5358346 Hedgehog ligand biogenesis                                                                                         | 21/1008   | 64/10723  | 1.7848E-07  | 1.85315E-06 | 1.20119E-06 | 21    |
| 95      | Cells | R-HSA-187577 Dectin-1-mediated noncanonical NF- $\kappa$ B signaling                                                             | 20/1008   | 59/10723  | 1.90856E-07 | 1.88157E-06 | 1.21961E-06 | 20    |
| 96      | Cells | R-HSA-5607761 Dectin-1-mediated noncanonical NF- $\kappa$ B signaling                                                            | 20/1008   | 59/10723  | 1.90856E-07 | 1.88157E-06 | 1.21961E-06 | 20    |
| 97      | Cells | R-HSA-5610780 Degradation of GLI1 by the proteasome                                                                              | 20/1008   | 59/10723  | 1.90856E-07 | 1.88157E-06 | 1.21961E-06 | 20    |
| 98      | Cells | R-HSA-5610783 Degradation of GLI2 by the proteasome                                                                              | 20/1008   | 59/10723  | 1.90856E-07 | 1.88157E-06 | 1.21961E-06 | 20    |
| 99      | Cells | R-HSA-5610785 GLI3 is processed to GLI3R by the proteasome                                                                       | 20/1008   | 59/10723  | 1.90856E-07 | 1.88157E-06 | 1.21961E-06 | 20    |
| 100     | Cells | R-HSA-4641257 Degradation of AXIN                                                                                                | 19/1008   | 54/10723  | 1.97023E-07 | 1.92294E-06 | 1.24643E-06 | 19    |
| 101     | Cells | R-HSA-68886 M Phase                                                                                                              | 67/1008   | 379/10723 | 2.31952E-07 | 2.24143E-06 | 1.45287E-06 | 67    |
|         |       |                                                                                                                                  |           |           |             |             |             |       |

|       |       |                |                                                                                                          |          |            |             |             |             |    |
|-------|-------|----------------|----------------------------------------------------------------------------------------------------------|----------|------------|-------------|-------------|-------------|----|
| 135   | Cells | R-HSA-179419   | APC/Cdc20 mediated degradation of cell cycle proteins prior to satisfaction of the cell cycle checkpoint | 20/10/08 | 73/10/723  | 8.18347E-06 | 5.91634E-05 | 3.8349E-05  | 20 |
| 136   | Cells | R-HSA-5621481  | C-type lectin receptors (CLRs)                                                                           | 30/10/08 | 138/10/723 | 9.31765E-06 | 8.84407E-05 | 4.43663E-05 | 30 |
| 137   | Cells | R-HSA-6803529  | FGFR2 alternative splicing                                                                               | 11/10/08 | 26/10/723  | 9.83161E-06 | 7.00413E-05 | 4.53999E-05 | 11 |
| 138   | Cells | R-HSA-176408   | Regulation of APC/C activators between G1/S and early anaphase                                           | 21/10/08 | 80/10/723  | 1.01646E-05 | 7.18885E-05 | 4.65973E-05 | 21 |
| 139   | Cells | R-HSA-9013408  | RHO GTPase cycle                                                                                         | 20/10/08 | 74/10/723  | 1.02383E-05 | 7.18893E-05 | 4.65978E-05 | 20 |
| 140   | Cells | R-HSA-8849613  | Cristae formation                                                                                        | 12/10/08 | 31/10/723  | 1.16008E-05 | 8.08739E-05 | 5.24215E-05 | 12 |
| 141   | Cells | R-HSA-90133694 | Signaling by NOTCH4                                                                                      | 21/10/08 | 81/10/723  | 1.25262E-05 | 8.67062E-05 | 5.62026E-05 | 21 |
| 142   | Cells | R-HSA-176409   | APC/C-Cdc20 mediated degradation of mitotic proteins                                                     | 20/10/08 | 75/10/723  | 1.27466E-05 | 8.76101E-05 | 5.67878E-05 | 20 |
| 143   | Cells | R-HSA-75153    | Apoptotic execution phase                                                                                | 16/10/08 | 52/10/723  | 1.31278E-05 | 8.99063E-05 | 5.82762E-05 | 16 |
| 144   | Cells | R-HSA-192528   | RHO GTPase Effectors                                                                                     | 50/10/08 | 288/10/723 | 1.34064E-05 | 9.08856E-05 | 5.8898E-05  | 50 |
| 145   | Cells | R-HSA-692023   | Cyclin A-Cdk2 associated events during G1/S transition                                                   | 21/10/08 | 82/10/723  | 1.53713E-05 | 0.000102992 | 6.67582E-05 | 21 |
| 146   | Cells | R-HSA-9020702  | Interleukin-1 signaling                                                                                  | 24/10/08 | 101/10/723 | 1.54066E-05 | 0.000102992 | 6.67582E-05 | 24 |
| 147   | Cells | R-HSA-176814   | Activation of APC/C and APC/C-Cdc20 mediated degradation of mitotic proteins                             | 20/10/08 | 76/10/723  | 1.57941E-05 | 0.000104156 | 6.75124E-05 | 20 |
| 148   | Cells | R-HSA-5619084  | ABC transporter disorders                                                                                | 23/10/08 | 76/10/723  | 1.57941E-05 | 0.000104156 | 6.75124E-05 | 23 |
| 149   | Cells | R-HSA-5689063  | UCH protein levels                                                                                       | 23/10/08 | 95/10/723  | 1.66625E-05 | 0.000108417 | 7.02749E-05 | 23 |
| 150   | Cells | R-HSA-8878159  | Transcriptional regulation by RUNX3                                                                      | 28/10/08 | 130/10/723 | 2.2468E-05  | 0.000145157 | 9.40892E-05 | 28 |
| 151   | Cells | R-HSA-8856688  | Golgi-to-ER retrograde transport                                                                         | 31/10/08 | 151/10/723 | 2.2858E-05  | 0.000145157 | 9.40892E-05 | 31 |
| 152   | Cells | R-HSA-162587   | HIV Life Cycle                                                                                           | 23/10/08 | 97/10/723  | 2.39248E-05 | 0.00014873  | 9.64049E-05 | 23 |
| 153   | Cells | R-HSA-691566   | Cyclin A-Cdk2 associated events during S phase entry                                                     | 11/10/08 | 28/10/723  | 2.29039E-05 | 0.000145157 | 9.40892E-05 | 11 |
| 154   | Cells | R-HSA-75067    | Processing of Capbed Introns/Pre-mRNA                                                                    | 25/10/08 | 110/10/723 | 2.34175E-05 | 0.00014651  | 9.49659E-05 | 25 |
| 155   | Cells | R-HSA-5696398  | Nucleotide Excision Repair                                                                               | 25/10/08 | 110/10/723 | 2.34175E-05 | 0.00014651  | 9.49659E-05 | 25 |
| 156   | Cells | R-HSA-68875    | Mitotic Prophase                                                                                         | 23/10/08 | 97/10/723  | 2.39248E-05 | 0.00014873  | 9.64049E-05 | 23 |
| 157   | Cells | R-HSA-8939236  | RUNX3 regulates transcription of genes involved in differentiation of HSCs                               | 19/10/08 | 72/10/723  | 2.45539E-05 | 0.000151663 | 9.83058E-05 | 19 |
| 158   | Cells | R-HSA-69017    | CDK-mediated phosphorylation and removal of Cdc6                                                         | 15/10/08 | 49/10/723  | 2.61873E-05 | 0.000160747 | 0.000104194 | 15 |
| 159   | Cells | R-HSA-6811436  | COP-independent Golgi-to-ER retrograde traffic                                                           | 19/10/08 | 73/10/723  | 3.03112E-05 | 0.00018375  | 0.000119104 | 19 |
| 160   | Cells | R-HSA-174178   | APC/Cdh1 mediated degradation of Cdc20 and other APC/Cdh1 targeted proteins in late mitosis/early G1     | 19/10/08 | 73/10/723  | 3.03112E-05 | 0.00018375  | 0.000119104 | 19 |
| 161   | Cells | R-HSA-569638   | Signaling by TRAF3                                                                                       | 21/10/08 | 87/10/723  | 4.03025E-05 | 0.000241321 | 0.000156421 | 21 |
| 162   | Cells | R-HSA-174143   | APC/C-mediated degradation of cell cycle proteins                                                        | 12/10/08 | 37/10/723  | 4.03025E-05 | 0.000241321 | 0.000156421 | 12 |
| 163   | Cells | R-HSA-453276   | Regulation of mitotic cell cycle                                                                         | 21/10/08 | 37/10/723  | 4.03025E-05 | 0.000241321 | 0.000156421 | 21 |
| 164   | Cells | R-HSA-432720   | Lysosome Biogenesis                                                                                      | 12/10/08 | 37/10/723  | 4.03025E-05 | 0.000241321 | 0.000156421 | 12 |
| 165   | Cells | R-HSA-913559   | snRNP Assembly                                                                                           | 15/10/08 | 52/10/723  | 5.69027E-05 | 0.000322557 | 0.000215556 | 15 |
| 166   | Cells | R-HSA-194441   | Metabolism of non-coding RNA                                                                             | 15/10/08 | 52/10/723  | 5.69027E-05 | 0.000322557 | 0.000215556 | 15 |
| 167   | Cells | R-HSA-3371497  | HSP90 chaperone cycle for steroid hormone receptors (SHR)                                                | 9/10/08  | 21/10/723  | 5.72772E-05 | 0.000332753 | 0.000215687 | 9  |
| 168   | Cells | R-HSA-5627123  | RHO GTPase activate PAKs                                                                                 | 27/10/08 | 130/10/723 | 6.13366E-05 | 0.00035424  | 0.000229614 | 27 |
| 169   | Cells | R-HSA-697206   | G1/S Transition                                                                                          | 12/10/08 | 36/10/723  | 6.60461E-05 | 0.000376965 | 0.000243444 | 12 |
| 170   | Cells | R-HSA-202424   | Downstream TCR signaling                                                                                 | 28/10/08 | 138/10/723 | 6.98022E-05 | 0.000396087 | 0.000256739 | 28 |
| 171   | Cells | R-HSA-5663213  | RHO GTPase Activate WASPs and WAVEs                                                                      | 37/10/08 | 205/10/723 | 7.56551E-05 | 0.00042817  | 0.000273658 | 37 |
| 172   | Cells | R-HSA-6807070  | PTEN Regulation                                                                                          | 9/10/08  | 22/10/723  | 8.65336E-05 | 0.00045271  | 0.000244547 | 9  |
| 173   | Cells | R-HSA-8878171  | Transcriptional regulation by RUNX1                                                                      | 12/10/08 | 37/10/723  | 8.94703E-05 | 0.000496153 | 0.000321601 | 12 |
| 174   | Cells | R-HSA-295410   | Nuclear Envelope (NE) Reassembly                                                                         | 25/10/08 | 119/10/723 | 9.34493E-05 | 0.000515291 | 0.000334505 | 25 |
| 175   | Cells | R-HSA-8878166  | Transcriptional regulation by RUNX2                                                                      | 13/10/08 | 43/10/723  | 0.000103179 | 0.000540095 | 0.000316888 | 13 |
| 176   | Cells | R-HSA-5696395  | Formation of Inclusion Complex in GG-NER                                                                 | 29/10/08 | 149/10/723 | 0.000114021 | 0.000621702 | 0.000402988 | 29 |
| 177   | Cells | R-HSA-69481    | G2/M Checkpoints                                                                                         | 15/10/08 | 55/10/723  | 0.000115478 | 0.000626148 | 0.000405862 | 15 |
| 178   | Cells | R-HSA-429914   | Deadenylation-dependent mRNA decay                                                                       | 9/10/08  | 23/10/723  | 0.000113919 | 0.000720176 | 0.00046681  | 9  |
| 179   | Cells | R-HSA-9013418  | RHO GTPase cycle                                                                                         | 44/10/08 | 147/10/723 | 0.000114792 | 0.000720176 | 0.00046681  | 44 |
| 180   | Cells | R-HSA-8854214  | TRC/RAGAPs                                                                                               | 17/10/08 | 68/10/723  | 0.000135033 | 0.000720176 | 0.00046681  | 17 |
| 181   | Cells | R-HSA-3371453  | Regulation of HSF1-mediated heat shock response                                                          | 18/10/08 | 75/10/723  | 0.000152265 | 0.000807668 | 0.000523521 | 18 |
| 182   | Cells | R-HSA-9003991  | Extra-nuclear estrogen signaling                                                                         | 22/10/08 | 102/10/723 | 0.000167178 | 0.000833173 | 0.00053017  | 22 |
| 183   | Cells | R-HSA-882556   | ABC-family proteins mediated transport                                                                   | 18/10/08 | 72/10/723  | 0.000166008 | 0.00087157  | 0.000545494 | 18 |
| 184   | Cells | R-HSA-948021   | Transport to the Golgi and subsequent modification                                                       | 28/10/08 | 145/10/723 | 0.000170994 | 0.000892461 | 0.000578483 | 28 |
| 185   | Cells | R-HSA-8856828  | Clahtin-mediated endocytosis                                                                             | 27/10/08 | 138/10/723 | 0.000177117 | 0.000919499 | 0.000596009 | 27 |
| 186   | Cells | R-HSA-162599   | Late Phase of HIV Life Cycle                                                                             | 23/10/08 | 110/10/723 | 0.000189369 | 0.000979908 | 0.000613868 | 23 |
| 187   | Cells | R-HSA-5610787  | Hedgehog 'off' state                                                                                     | 28/10/08 | 146/10/723 | 0.000133047 | 0.00099165  | 0.000642776 | 28 |
| 188   | Cells | R-HSA-9679506  | SARS-CoV Infections                                                                                      | 20/10/08 | 90/10/723  | 0.000207199 | 0.001058776 | 0.000686286 | 20 |
| 189   | Cells | R-HSA-69052    | Switching of origins to a post-replicative state                                                         | 19/10/08 | 84/10/723  | 0.000232278 | 0.001174631 | 0.000761382 | 19 |
| 190   | Cells | R-HSA-5632684  | Hedgehog 'on' state                                                                                      | 19/10/08 | 84/10/723  | 0.000232278 | 0.001174631 | 0.000761382 | 19 |
| 191   | Cells | R-HSA-5696399  | Global Genome Nucleotide Excision Repair (GG-NER)                                                        | 19/10/08 | 84/10/723  | 0.000232278 | 0.001174631 | 0.000761382 | 19 |
| 192   | Cells | R-HSA-5632684  | Global Genome Nucleotide Excision Repair (GG-NER)                                                        | 19/10/08 | 84/10/723  | 0.000232278 | 0.001174631 | 0.000761382 | 19 |
| 193   | Cells | R-HSA-5632684  | Global Genome Nucleotide Excision Repair (GG-NER)                                                        | 19/10/08 | 84/10/723  | 0.000232278 | 0.001174631 | 0.000761382 | 19 |
| 194   | Cells | R-HSA-5632684  | Global Genome Nucleotide Excision Repair (GG-NER)                                                        | 19/10/08 | 84/10/723  | 0.000232278 | 0.001174631 | 0.000761382 | 19 |
| 195   | Cells | R-HSA-5632684  | Global Genome Nucleotide Excision Repair (GG-NER)                                                        | 19/10/08 | 84/10/723  | 0.000232278 | 0.001174631 | 0.000761382 | 19 |
| 196   | Cells | R-HSA-5632684  | Global Genome Nucleotide Excision Repair (GG-NER)                                                        | 19/10/08 | 84/10/723  | 0.000232278 | 0.001174631 | 0.000761382 | 19 |
| 197   | Cells | R-HSA-5632684  | Global Genome Nucleotide Excision Repair (GG-NER)                                                        | 19/10/08 | 84/10/723  | 0.000232278 | 0.001174631 | 0.000761382 | 19 |
| 198   | Cells | R-HSA-5632684  | Global Genome Nucleotide Excision Repair (GG-NER)                                                        | 19/10/08 | 84/10/723  | 0.000232278 | 0.001174631 | 0.000761382 | 19 |
| 199   | Cells | R-HSA-5632684  | Global Genome Nucleotide Excision Repair (GG-NER)                                                        | 19/10/08 | 84/10/723  | 0.000232278 | 0.001174631 | 0.000761382 | 19 |
| 200   | Cells | R-HSA-5632684  | Global Genome Nucleotide Excision Repair (GG-NER)                                                        | 19/10/08 | 84/10/723  | 0.000232278 | 0.001174631 | 0.000761382 | 19 |
| 201   | Cells | R-HSA-5632684  | Global Genome Nucleotide Excision Repair (GG-NER)                                                        | 19/10/08 | 84/10/723  | 0.000232278 | 0.001174631 | 0.000761382 | 19 |
| 202   | Cells | R-HSA-5632684  | Global Genome Nucleotide Excision Repair (GG-NER)                                                        | 19/10/08 | 84/10/723  | 0.000232278 | 0.001174631 | 0.000761382 | 19 |
| 203   | Cells | R-HSA-5632684  | Global Genome Nucleotide Excision Repair (GG-NER)                                                        | 19/10/08 | 84/10/723  | 0.000232278 | 0.001174631 | 0.000761382 | 19 |
| 204   | Cells | R-HSA-5632684  | Global Genome Nucleotide Excision Repair (GG-NER)                                                        | 19/10/08 | 84/10/723  | 0.000232278 | 0.001174631 | 0.000761382 | 19 |
| 205   | Cells | R-HSA-5632684  | Global Genome Nucleotide Excision Repair (GG-NER)                                                        | 19/10/08 | 84/10/723  | 0.000232278 | 0.001174631 | 0.000761382 | 19 |
| 206   | Cells | R-HSA-5632684  | Global Genome Nucleotide Excision Repair (GG-NER)                                                        | 19/10/08 | 84/10/723  | 0.000232278 | 0.001174631 | 0.000761382 | 19 |
| 207   | Cells | R-HSA-5632684  | Global Genome Nucleotide Excision Repair (GG-NER)                                                        | 19/10/08 | 84/10/723  | 0.000232278 | 0.001174631 | 0.000761382 | 19 |
| 208   | Cells | R-HSA-5632684  | Global Genome Nucleotide Excision Repair (GG-NER)                                                        | 19/10/08 | 84/10/723  | 0.000232278 | 0.001174631 | 0.000761382 | 19 |
| 209   | Cells | R-HSA-5632684  | Global Genome Nucleotide Excision Repair (GG-NER)                                                        | 19/10/08 | 84/10/723  | 0.000232278 | 0.001174631 | 0.000761382 | 19 |
| 210   | Cells | R-HSA-5632684  | Global Genome Nucleotide Excision Repair (GG-NER)                                                        | 19/10/08 | 84/10/723  | 0.000232278 | 0.001174631 | 0.000761382 | 19 |
| 211   | Cells | R-HSA-5632684  | Global Genome Nucleotide Excision Repair (GG-NER)                                                        | 19/10/08 | 84/10/723  | 0.000232278 | 0.001174631 | 0.000761382 | 19 |
| 212   | Cells | R-HSA-5632684  | Global Genome Nucleotide Excision Repair (GG-NER)                                                        | 19/10/08 | 84/10/723  | 0.000232278 | 0.001174631 | 0.000761382 | 19 |
| 213   | Cells | R-HSA-5632684  | Global Genome Nucleotide Excision Repair (GG-NER)                                                        | 19/10/08 | 84/10/723  | 0.000232278 | 0.001174631 | 0.000761382 | 19 |
| 214   | Cells | R-HSA-5632684  | Global Genome Nucleotide Excision Repair (GG-NER)                                                        | 19/10/08 | 84/10/723  | 0.000232278 | 0.001174631 | 0.000761382 | 19 |
| 215   | Cells | R-HSA-5632684  | Global Genome Nucleotide Excision Repair (GG-NER)                                                        | 19/10/08 | 84/10/723  | 0.000232278 | 0.001174631 | 0.000761382 | 19 |
| 216   | Cells | R-HSA-5632684  | Global Genome Nucleotide Excision Repair (GG-NER)                                                        | 19/10/08 | 84/10/723  | 0.000232278 | 0.001174631 | 0.000761382 | 19 |
| 217   | Cells | R-HSA-5632684  | Global Genome Nucleotide Excision Repair (GG-NER)                                                        | 19/10/08 | 84/10/723  | 0.000232278 | 0.001174631 | 0.000761382 | 19 |
| 218   | Cells | R-HSA-5632684  | Global Genome Nucleotide Excision Repair (GG-NER)                                                        | 19/10/08 | 84/10/723  | 0.000232278 | 0.001174631 | 0.000761382 | 19 |
| 219   | Cells | R-HSA-5632684  | Global Genome Nucleotide Excision Repair (GG-NER)                                                        | 19/10/08 | 84/10/723  | 0.000232278 | 0.001174631 | 0.000761382 | 19 |
| 220   | Cells | R-HSA-5632684  | Global Genome Nucleotide Excision Repair (GG-NER)                                                        | 19/10/08 | 84/10/723  | 0.000232278 | 0.001174631 | 0.000761382 | 19 |
| 221   | Cells | R-HSA-5632684  | Global Genome Nucleotide Excision Repair (GG-NER)                                                        | 19/10/08 | 84/10/723  | 0.000232278 | 0.001174631 | 0.000761382 | 19 |
| 222   | Cells | R-HSA-5632684  | Global Genome Nucleotide Excision Repair (GG-NER)                                                        | 19/10/08 | 84/10/723  | 0.000232278 | 0.001174631 | 0.000761382 | 19 |
| 223   | Cells | R-HSA-5632684  | Global Genome Nucleotide Excision Repair (GG-NER)                                                        | 19/10/08 | 84/10/723  | 0.000232278 | 0.001174631 | 0.000761382 | 19 |
| 224   | Cells | R-HSA-5632684  | Global Genome Nucleotide Excision Repair (GG-NER)                                                        | 19/10/08 | 84/10/723  | 0.000232278 | 0.001174631 | 0.000761382 | 19 |
| 225   | Cells | R-HSA-5632684  | Global Genome Nucleotide Excision Repair (GG-NER)                                                        | 19/10/08 | 84/10/723  | 0.000232278 | 0.001174631 | 0.000761382 | 19 |
| 226   | Cells | R-HSA-5632684  | Global Genome Nucleotide Excision Repair (GG-NER)                                                        | 19/10/08 | 84/10/723  | 0.000232278 | 0.001174631 | 0.000761382 | 19 |
| 227   | Cells | R-HSA-5632684  | Global Genome Nucleotide Excision Repair (GG-NER)                                                        | 19/10/08 | 84/10/723  | 0.000232278 | 0.001174631 | 0.000761382 | 19 |
| 228</ |       |                |                                                                                                          |          |            |             |             |             |    |

|     |                |                |                                                                                                  |         |             |             |             |             |    |
|-----|----------------|----------------|--------------------------------------------------------------------------------------------------|---------|-------------|-------------|-------------|-------------|----|
| 270 | Cells          | R-HSA-456926   | Thrombin signalling through protease activated receptors (PARs)                                  | 8/1008  | 32/10/2023  | 0.00805879  | 0.029111032 | 0.018882388 | 8  |
| 271 | Cells          | R-HSA-68242    | S Phase                                                                                          | 25/1008 | 16/1/2023   | 0.00834989  | 0.029728073 | 0.019269383 | 25 |
| 272 | Cells          | R-HSA-167044   | Signalling to RAS                                                                                | 6/1008  | 20/10/2023  | 0.00815312  | 0.029728073 | 0.019269383 | 6  |
| 273 | Cells          | R-HSA-416572   | Sema4D induced cell migration and growth-cone collapse                                           | 6/1008  | 20/10/2023  | 0.00815312  | 0.029728073 | 0.019269383 | 6  |
| 274 | Cells          | R-HSA-4086398  | Ca2+ pathway                                                                                     | 12/1008 | 60/10/2023  | 0.00899543  | 0.032056766 | 0.020778814 | 12 |
| 275 | Cells          | R-HSA-167169   | HIV Transcription Elongation                                                                     | 10/1008 | 46/10/2023  | 0.009145859 | 0.032109204 | 0.020812804 | 10 |
| 276 | Cells          | R-HSA-167200   | Formation of HIV-1 elongation complex containing HIV-1 Tat                                       | 10/1008 | 46/10/2023  | 0.009145859 | 0.032109204 | 0.020812804 | 10 |
| 277 | Cells          | R-HSA-167246   | Tat-mediated elongation of the HIV-1 transcript                                                  | 10/1008 | 46/10/2023  | 0.009145859 | 0.032109204 | 0.020812804 | 10 |
| 278 | Cells          | R-HSA-4570464  | SUMOylation of RNA binding proteins                                                              | 10/1008 | 46/10/2023  | 0.009145859 | 0.032109204 | 0.020812804 | 10 |
| 279 | Cells          | R-HSA-180910   | Vir-mediated nuclear import of P1C5                                                              | 8/1008  | 33/10/2023  | 0.009781856 | 0.034096755 | 0.022101111 | 8  |
| 280 | Cells          | R-HSA-5663084  | Diseases of carbohydrate metabolism                                                              | 3/1008  | 33/10/2023  | 0.009781856 | 0.034096755 | 0.022101111 | 3  |
| 281 | Cells          | R-HSA-70326    | Glucose metabolism                                                                               | 16/1008 | 91/10/2023  | 0.010160181 | 0.035289453 | 0.022874203 | 16 |
| 282 | Cells          | R-HSA-8848021  | Signaling by PTK6                                                                                | 11/1008 | 54/10/2023  | 0.010571597 | 0.036458934 | 0.023631247 | 11 |
| 283 | Cells          | R-HSA-9006927  | Signaling by Non-Receptor Tyrosine Kinases                                                       | 11/1008 | 54/10/2023  | 0.010571597 | 0.036458934 | 0.023631247 | 11 |
| 284 | Cells          | R-HSA-563205   | MAPK family signaling cascades                                                                   | 13/1008 | 22/1/2023   | 0.010860043 | 0.037321838 | 0.023911571 | 13 |
| 285 | Cells          | R-HSA-4085377  | SUMOylation of SUMOylation proteins                                                              | 8/1008  | 34/10/2023  | 0.011764244 | 0.040287376 | 0.026113797 | 8  |
| 286 | Cells          | R-HSA-167152   | Formation of HIV elongation complex in the absence of HIV Tat                                    | 10/1008 | 48/10/2023  | 0.012369633 | 0.042212452 | 0.027361609 | 10 |
| 287 | Cells          | R-HSA-9645723  | Diseases of programmed cell death                                                                | 13/1008 | 70/10/2023  | 0.012512433 | 0.042550991 | 0.027581046 | 13 |
| 288 | Cells          | R-HSA-4721827  | Transcription-Coupled Nucleotide Excision Repair (TC-NER)                                        | 14/1008 | 76/10/2023  | 0.013107505 | 0.044419878 | 0.028791626 | 14 |
| 289 | Cells          | R-HSA-9665686  | Signaling by ERBB2 TMD/TMD mutants                                                               | 6/1008  | 22/10/2023  | 0.01361092  | 0.045966289 | 0.029794801 | 6  |
| 290 | Cells          | R-HSA-5689880  | Ub-specific processing proteases                                                                 | 29/1008 | 202/10/2023 | 0.013790562 | 0.046412375 | 0.030083949 | 29 |
| 291 | Cells          | R-HSA-157118   | Signaling by NOTCH                                                                               | 29/1008 | 203/10/2023 | 0.014658587 | 0.049289197 | 0.031948671 | 29 |
| 292 | Cells/Exosomes | R-HSA-9609502  | HCN1 Early Events                                                                                | 39/162  | 98/10/2023  | 1.21863E+6  | 7.56767E+4  | 2.15505E+4  | 39 |
| 293 | Cells/Exosomes | R-HSA-8939236  | RUNX1 regulates transcription of genes involved in differentiation of HSCs                       | 37/162  | 97/10/2023  | 2.21474E+3  | 6.87676E+1  | 1.95383E+1  | 37 |
| 294 | Cells/Exosomes | R-HSA-68886    | M Phase                                                                                          | 57/162  | 379/10/2023 | 2.88816E+2  | 5.30431E+0  | 1.51051E+0  | 57 |
| 295 | Cells/Exosomes | R-HSA-9609646  | HCN1 Infection                                                                                   | 39/162  | 122/10/2023 | 3.41663E+2  | 5.30431E+0  | 1.51051E+0  | 39 |
| 296 | Cells/Exosomes | R-HSA-5625740  | RHO GTPase activate PKNs                                                                         | 30/162  | 62/10/2023  | 4.32755E+3  | 5.37482E+7  | 1.52059E+7  | 30 |
| 297 | Cells/Exosomes | R-HSA-73728    | RNA Polymerase I Promoter Opening                                                                | 24/162  | 31/10/2023  | 8.23046E+3  | 8.51853E+7  | 2.42422E+7  | 24 |
| 298 | Cells/Exosomes | R-HSA-195258   | RHO GTPase Effectors                                                                             | 49/162  | 288/10/2023 | 1.13076E+3  | 1.00314E+3  | 2.85656E+7  | 49 |
| 299 | Cells/Exosomes | R-HSA-171306   | Packaging Of Telomere Ends                                                                       | 24/162  | 32/10/2023  | 3.25146E+3  | 2.5239E+6   | 1.78731E+7  | 24 |
| 300 | Cells/Exosomes | R-HSA-5324118  | DNA methylation                                                                                  | 24/162  | 32/10/2023  | 1.17741E+7  | 8.12413E+6  | 2.3131E+6   | 24 |
| 301 | Cells/Exosomes | R-HSA-5625886  | Activated PKEN1 stimulates transcription of AR (androgen receptor) regulated genes KLK2 and KLK3 | 24/162  | 35/10/2023  | 1.24237E+6  | 7.71514E+5  | 2.19704E+5  | 24 |
| 302 | Cells/Exosomes | R-HSA-110330   | Recognition and association of DNA glycosylase with site containing an affected purine           | 24/162  | 36/10/2023  | 3.68093E+3  | 1.63276E+4  | 4.6496E+5   | 24 |
| 303 | Cells/Exosomes | R-HSA-110331   | Cleavage of the damaged purine                                                                   | 24/162  | 36/10/2023  | 3.68093E+3  | 1.63276E+4  | 4.6496E+5   | 24 |
| 304 | Cells/Exosomes | R-HSA-427359   | SIRT1 negatively regulates RNA expression                                                        | 24/162  | 36/10/2023  | 3.68093E+3  | 1.63276E+4  | 4.6496E+5   | 24 |
| 305 | Cells/Exosomes | R-HSA-73927    | Depurination                                                                                     | 24/162  | 36/10/2023  | 3.68093E+3  | 1.63276E+4  | 4.6496E+5   | 24 |
| 306 | Cells/Exosomes | R-HSA-8852276  | The role of GSE1 in G2/M progression after G2 checkpoint                                         | 29/162  | 74/10/2023  | 2.05641E+34 | 8.51356E+33 | 2.4244E+33  | 29 |
| 307 | Cells/Exosomes | R-HSA-110328   | Recognition and association of DNA glycosylase with site containing an affected pyrimidine       | 24/162  | 41/10/2023  | 4.1883E+34  | 1.30047E+32 | 3.70334E+33 | 24 |
| 308 | Cells/Exosomes | R-HSA-110329   | Cleavage of the damaged pyrimidine                                                               | 24/162  | 41/10/2023  | 4.1883E+34  | 1.30047E+32 | 3.70334E+33 | 24 |
| 309 | Cells/Exosomes | R-HSA-211200   | PRC2 methylates histones and DNA                                                                 | 24/162  | 41/10/2023  | 4.1883E+34  | 1.30047E+32 | 3.70334E+33 | 24 |
| 310 | Cells/Exosomes | R-HSA-73928    | Depyrimidination                                                                                 | 24/162  | 41/10/2023  | 4.1883E+34  | 1.30047E+32 | 3.70334E+33 | 24 |
| 311 | Cells/Exosomes | R-HSA-9710421  | Defective pyroptosis                                                                             | 24/162  | 41/10/2023  | 4.1883E+34  | 1.30047E+32 | 3.70334E+33 | 24 |
| 312 | Cells/Exosomes | R-HSA-12299718 | Condensation of Prophase Chromosomes                                                             | 24/162  | 42/10/2023  | 9.65155E+34 | 2.8541E+32  | 8.17262E+33 | 24 |
| 313 | Cells/Exosomes | R-HSA-73929    | Base-Excision Repair, AP Site Formation                                                          | 24/162  | 43/10/2023  | 2.15722E+33 | 6.08923E+2  | 1.7401E+32  | 24 |
| 314 | Cells/Exosomes | R-HSA-427389   | ERC6 (CSB) and EHM2 (9p) positively regulate rRNA expression                                     | 24/162  | 44/10/2023  | 4.68703E+33 | 1.2655E+31  | 3.60376E+32 | 24 |
| 315 | Cells/Exosomes | R-HSA-606279   | Deposition of new PCNA-containing nucleosomes at the centromere                                  | 25/162  | 53/10/2023  | 2.81376E+32 | 6.98938E+31 | 1.99036E+31 | 25 |
| 316 | Cells/Exosomes | R-HSA-774815   | Nucleosome assembly                                                                              | 25/162  | 53/10/2023  | 2.81376E+32 | 6.98938E+31 | 1.99036E+31 | 25 |
| 317 | Cells/Exosomes | R-HSA-9670095  | Inhibition of DNA recombination at telomere                                                      | 24/162  | 47/10/2023  | 4.1377E+32  | 9.8718E+31  | 2.8158E+31  | 24 |
| 318 | Cells/Exosomes | R-HSA-967225   | Amyloid fiber formation                                                                          | 28/162  | 78/10/2023  | 6.00871E+32 | 1.3823E+30  | 3.9553E+31  | 28 |
| 319 | Cells/Exosomes | R-HSA-9645723  | Diseases of programmed cell death                                                                | 27/162  | 70/10/2023  | 7.70712E+32 | 1.70933E+30 | 4.86766E+31 | 27 |
| 320 | Cells/Exosomes | R-HSA-201681   | TCF dependent signaling in response to WNT                                                       | 24/162  | 199/10/2023 | 9.6594E+32  | 2.06844E+30 | 5.89031E+31 | 24 |
| 321 | Cells/Exosomes | R-HSA-2559582  | Disease-Associated Secretory Phenotype (SASP)                                                    | 28/162  | 80/10/2023  | 1.39737E+31 | 2.89256E+30 | 8.23175E+31 | 28 |
| 322 | Cells/Exosomes | R-HSA-157118   | Signaling by NOTCH                                                                               | 38/162  | 203/10/2023 | 2.12797E+31 | 4.26281E+30 | 1.21392E+30 | 38 |
| 323 | Cells/Exosomes | R-HSA-1221632  | Meiotic synapsis                                                                                 | 25/162  | 59/10/2023  | 8.74996E+31 | 1.59815E+29 | 4.55106E+30 | 25 |
| 324 | Cells/Exosomes | R-HSA-3214815  | HDACs deacetylate histones                                                                       | 25/162  | 59/10/2023  | 8.74996E+31 | 1.59815E+29 | 4.55106E+30 | 25 |
| 325 | Cells/Exosomes | R-HSA-5250924  | B-NHC complex positively regulates rRNA expression                                               | 25/162  | 59/10/2023  | 8.74996E+31 | 1.59815E+29 | 4.55106E+30 | 25 |
| 326 | Cells/Exosomes | R-HSA-2559586  | DNA Damage/Telomere Stress induced Senescence                                                    | 25/162  | 60/10/2023  | 1.48418E+30 | 2.62857E+29 | 7.48536E+30 | 25 |
| 327 | Cells/Exosomes | R-HSA-912446   | Meiotic recombination                                                                            | 24/162  | 54/10/2023  | 3.29516E+30 | 5.63748E+29 | 1.60539E+29 | 24 |
| 328 | Cells/Exosomes | R-HSA-5689880  | Ub-specific processing proteases                                                                 | 37/162  | 202/10/2023 | 3.51889E+30 | 5.63748E+29 | 1.60539E+29 | 37 |
| 329 | Cells/Exosomes | R-HSA-8878171  | Transcriptional regulation by RUNX1                                                              | 37/162  | 205/10/2023 | 5.9136E+30  | 9.60309E+29 | 2.75176E+29 | 37 |
| 330 | Cells/Exosomes | R-HSA-69481    | G2/M Checkpoints                                                                                 | 33/162  | 149/10/2023 | 8.49628E+30 | 1.35287E+28 | 3.85256E+29 | 33 |
| 331 | Cells/Exosomes | R-HSA-2559580  | Oxidative Stress Induced Senescence                                                              | 28/162  | 92/10/2023  | 1.33314E+29 | 2.0669E+28  | 5.89386E+29 | 28 |
| 332 | Cells/Exosomes | R-HSA-9616222  | Transcriptional regulation of granulopoiesis                                                     | 24/162  | 59/10/2023  | 2.86769E+29 | 4.43351E+28 | 1.2369E+28  | 24 |
| 333 | Cells/Exosomes | R-HSA-201722   | Formation of the beta-catenin/TCF transcriptional complex                                        | 24/162  | 59/10/2023  | 4.77411E+29 | 6.88471E+28 | 1.9634E+28  | 24 |
| 334 | Cells/Exosomes | R-HSA-73772    | RNA Polymerase I Promoter Escape                                                                 | 24/162  | 59/10/2023  | 4.77411E+29 | 6.88471E+28 | 1.9634E+28  | 24 |
| 335 | Cells/Exosomes | R-HSA-1912408  | Pre-Notch Transcription and Translation                                                          | 24/162  | 61/10/2023  | 1.27944E+28 | 1.80576E+27 | 5.14225E+28 | 24 |
| 336 | Cells/Exosomes | R-HSA-8936459  | RUNX1 regulates genes involved in megakaryocyte differentiation and platelet function            | 24/162  | 65/10/2023  | 8.13674E+28 | 1.1108E+26  | 3.16322E+27 | 24 |
| 337 | Cells/Exosomes | R-HSA-9645723  | Diseases of programmed cell death                                                                | 25/162  | 67/10/2023  | 8.40701E+28 | 1.1108E+26  | 3.16322E+27 | 25 |
| 338 | Cells/Exosomes | R-HSA-5578749  | Transcriptional regulation by small RNAs                                                         | 25/162  | 74/10/2023  | 8.40701E+28 | 1.1108E+26  | 3.16322E+27 | 25 |
| 339 | Cells/Exosomes | R-HSA-195721   | Signaling by WNT                                                                                 | 40/162  | 296/10/2023 | 2.48846E+27 | 3.21944E+26 | 9.168E+27   | 40 |
| 340 | Cells/Exosomes | R-HSA-5688426  | Deubiquitination                                                                                 | 39/162  | 279/10/2023 | 3.33398E+27 | 4.2253E+26  | 1.20324E+26 | 39 |
| 341 | Cells/Exosomes | R-HSA-9610379  | HCN1 Early Events                                                                                | 80/162  | 80/10/2023  | 8.08794E+27 | 1.00452E+25 | 2.86058E+26 | 80 |
| 342 | Cells/Exosomes | R-HSA-73884    | Base Excision Repair                                                                             | 24/162  | 71/10/2023  | 1.00688E+26 | 1.22603E+25 | 3.49136E+26 | 24 |
| 343 | Cells/Exosomes | R-HSA-9646399  | Aggregaphy                                                                                       | 20/162  | 40/10/2023  | 1.22867E+26 | 1.46732E+25 | 4.17848E+26 | 20 |
| 344 | Cells/Exosomes | R-HSA-427413   | NoRc negatively regulates rRNA expression                                                        | 24/162  | 74/10/2023  | 3.20793E+26 | 3.78826E+25 | 1.07024E+25 | 24 |
| 345 | Cells/Exosomes | R-HSA-1506020  | Meiosis                                                                                          | 86/162  | 86/10/2023  | 6.35579E+26 | 7.30915E+25 | 2.08143E+25 | 86 |
| 346 | Cells/Exosomes | R-HSA-1912422  | Pre-Notch Expression and Processing                                                              | 24/162  | 77/10/2023  | 9.64707E+26 | 1.06979E+24 | 3.04644E+25 | 24 |
| 347 | Cells/Exosomes | R-HSA-5250941  | Negative epigenetic regulation of rRNA expression                                                | 24/162  | 77/10/2023  | 9.64707E+26 | 1.06979E+24 | 3.04644E+25 | 24 |
| 348 | Cells/Exosomes | R-HSA-73854    | RNA Polymerase I Promoter Clearance                                                              | 24/162  | 78/10/2023  | 1.37615E+25 | 1.49928E+24 | 4.26949E+25 | 24 |
| 349 | Cells/Exosomes | R-HSA-73864    | RNA Polymerase I Transcription                                                                   | 24/162  | 79/10/2023  | 1.95208E+25 | 2.09007E+24 | 5.95139E+25 | 24 |
| 350 | Cells/Exosomes | R-HSA-427239   | Recycling pathway of L1                                                                          | 20/162  | 45/10/2023  | 2.65114E+25 | 2.79044E+24 | 7.94632E+25 | 20 |
| 351 | Cells/Exosomes | R-HSA-9018519  | Estrogen-dependent gene expression                                                               | 27/162  | 118/10/2023 | 7.46507E+25 | 7.72188E+24 | 2.19896E+24 | 27 |
| 352 | Cells/Exosomes | R-HSA-211000   | Gene Silencing by RNA                                                                            | 26/162  | 106/10/2023 | 8.33861E+25 | 8.48898E+24 | 2.4741E+24  | 26 |
| 353 | Cells/Exosomes | R-HSA-69275    | G2/M Transition                                                                                  | 32/162  | 192/10/2023 | 9.04078E+25 | 9.05537E+24 | 2.5876E+24  | 32 |
| 354 | Cells/Exosomes | R-HSA-5689603  | UCH proteinases                                                                                  | 24/162  | 107/10/2023 | 1.02663E+24 | 1.01198E+23 | 2.88176E+24 | 24 |
| 355 | Cells/Exosomes | R-HSA-3214847  | HATs acetylate histones                                                                          | 26/162  | 107/10/2023 | 1.08796E+23 | 1.05566E+23 | 3.00619E+24 | 26 |
| 356 | Cells/Exosomes | R-HSA-453274   | Mitotic G2-G1 Transition                                                                         | 32/162  | 194/10/2023 | 1.26703E+24 | 1.21051E+23 | 3.44715E+24 | 32 |
| 357 | Cells/Exosomes | R-HSA-1445148  | Translocation of SLF224 (GLUT4) to the plasma membrane                                           | 22/162  | 79/10/2023  | 4.5109E+24  | 4.24443E+23 | 1.20866E+23 | 22 |
| 358 | Cells/Exosomes | R-HSA-5617472  | Activation of anterior HOX genes in hindbrain development during early embryogenesis             | 20/162  | 79/10/2023  | 4.89291E+24 | 4.46838E+23 | 1.27246E+23 | 20 |
| 359 | Cells/Exosomes | R-HSA-5619507  | Activation of HOX genes during differentiation                                                   | 24/162  | 89/10/2023  | 4.89291E+24 | 4.46838E+23 | 1.27246E+23 | 24 |
| 360 | Cells/Exosomes | R-HSA-3371497  | HSP90 chaperone cycle for steroid hormone receptors (SHR)                                        | 20/162  | 52/10/2023  | 9.63875E+24 | 8.67487E+23 | 2.47034E+23 | 20 |
| 361 | Cells/Exosomes | R-HSA-157579   | Retromer Maintenance                                                                             | 24/162  | 92/10/2023  | 1.18087E+23 | 1.0476E+22  | 2.98326E+23 | 24 |
| 362 | Cells/Exosomes | R-HSA-2559583  | Cellular Senescence                                                                              | 29/162  | 164/10/2023 | 3.03628E+23 | 2.65686E+22 | 7.54257E+23 | 29 |
| 363 | Cells/Exosomes | R-HSA-1474165  | H2A acetylation                                                                                  | 25/162  | 111/10/2023 | 7.09718E+23 | 6.2123E+22  | 1.74317E+22 | 25 |
| 364 |                |                |                                                                                                  |         |             |             |             |             |    |

|     |               |               |                                                                                                          |        |           |             |             |             |    |
|-----|---------------|---------------|----------------------------------------------------------------------------------------------------------|--------|-----------|-------------|-------------|-------------|----|
| 405 | Cell&Exosomes | R-HSA-5693567 | HDR through Homologous Recombination (HRR) or Single Strand Annealing (SSA)                              | 19/162 | 113/10723 | 4.35557E-15 | 2.37264E-14 | 6.75656E-15 | 19 |
| 406 | Cell&Exosomes | R-HSA-2995410 | Nuclear Envelope (NE) Reassembly                                                                         | 16/162 | 72/10723  | 6.91132E-15 | 3.73211E-14 | 1.06279E-14 | 16 |
| 407 | Cell&Exosomes | R-HSA-450531  | Regulation of mRNA stability by proteins that bind AU-rich elements                                      | 17/162 | 86/10723  | 7.72206E-15 | 4.1343E-14  | 1.17732E-14 | 17 |
| 408 | Cell&Exosomes | R-HSA-6811436 | COP1-independent Golgi-to-ER retrograde traffic                                                          | 14/162 | 49/10723  | 7.8247E-15  | 4.15311E-14 | 1.18286E-14 | 14 |
| 409 | Cell&Exosomes | R-HSA-8852135 | Protein ubiquitination                                                                                   | 16/162 | 74/10723  | 1.10044E-14 | 5.79131E-14 | 1.64919E-14 | 16 |
| 410 | Cell&Exosomes | R-HSA-5693538 | Homology Directed Repair                                                                                 | 19/162 | 110/10723 | 1.1739E-14  | 6.126E-14   | 1.7445E-14  | 19 |
| 411 | Cell&Exosomes | R-HSA-70263   | Glucogenesis                                                                                             | 12/162 | 34/10723  | 3.85937E-14 | 1.99721E-13 | 5.6875E-14  | 12 |
| 412 | Cell&Exosomes | R-HSA-5362768 | hn mRNAs are degraded by ERAD                                                                            | 14/162 | 55/10723  | 4.66641E-14 | 2.39491E-13 | 6.81998E-14 | 14 |
| 413 | Cell&Exosomes | R-HSA-983189  | Kinesins                                                                                                 | 14/162 | 57/10723  | 8.03597E-14 | 4.09044E-13 | 1.16483E-13 | 14 |
| 414 | Cell&Exosomes | R-HSA-5387390 | hn mutants abrogate ligand secretion                                                                     | 14/162 | 58/10723  | 1.04561E-13 | 5.27904E-13 | 1.50313E-13 | 14 |
| 415 | Cell&Exosomes | R-HSA-5678895 | Defective CTR causes cystic fibrosis                                                                     | 14/162 | 60/10723  | 1.74225E-13 | 8.72521E-13 | 2.48471E-13 | 14 |
| 416 | Cell&Exosomes | R-HSA-109581  | Apoptosis                                                                                                | 21/162 | 178/10723 | 2.155E-13   | 1.0634E-12  | 3.02824E-13 | 21 |
| 417 | Cell&Exosomes | R-HSA-211733  | Regulation of activated PAK-2p34 by proteasome mediated degradation                                      | 13/162 | 49/10723  | 2.15762E-13 | 1.0634E-12  | 3.02824E-13 | 13 |
| 418 | Cell&Exosomes | R-HSA-390466  | Chaperonin-mediated protein folding                                                                      | 16/162 | 89/10723  | 2.37799E-13 | 1.16273E-12 | 3.31111E-13 | 16 |
| 419 | Cell&Exosomes | R-HSA-318064  | Post NMDA receptor activation events                                                                     | 15/162 | 76/10723  | 3.24971E-13 | 1.57661E-12 | 4.48973E-13 | 15 |
| 420 | Cell&Exosomes | R-HSA-180534  | Yvu mediated degradation of CD4                                                                          | 13/162 | 51/10723  | 3.81266E-13 | 1.76691E-12 | 5.03163E-13 | 13 |
| 421 | Cell&Exosomes | R-HSA-349425  | Autodegradation of the E3 ubiquitin ligase COP1                                                          | 13/162 | 51/10723  | 3.81266E-13 | 1.76691E-12 | 5.03163E-13 | 13 |
| 422 | Cell&Exosomes | R-HSA-69601   | Ubiquitin Mediated Degradation of Phosphorylated Cdc25A                                                  | 13/162 | 51/10723  | 3.81266E-13 | 1.76691E-12 | 5.03163E-13 | 13 |
| 423 | Cell&Exosomes | R-HSA-69610   | p53-independent DNA Damage Response                                                                      | 13/162 | 51/10723  | 3.81266E-13 | 1.76691E-12 | 5.03163E-13 | 13 |
| 424 | Cell&Exosomes | R-HSA-69613   | p53-independent G1/S DNA damage checkpoint                                                               | 13/162 | 51/10723  | 3.81266E-13 | 1.76691E-12 | 5.03163E-13 | 13 |
| 425 | Cell&Exosomes | R-HSA-75815   | Ubiquitin-dependent degradation of Cyclin D                                                              | 13/162 | 51/10723  | 3.81266E-13 | 1.76691E-12 | 5.03163E-13 | 13 |
| 426 | Cell&Exosomes | R-HSA-5358346 | Hedgehog ligand biogenesis                                                                               | 14/162 | 64/10723  | 4.56317E-13 | 2.09906E-12 | 5.97748E-13 | 14 |
| 427 | Cell&Exosomes | R-HSA-5157801 | Programmed Cell Death                                                                                    | 22/162 | 207/10723 | 4.82527E-13 | 2.20336E-12 | 6.27041E-13 | 22 |
| 428 | Cell&Exosomes | R-HSA-169911  | Regulation of Apoptosis                                                                                  | 13/162 | 52/10723  | 5.01783E-13 | 2.27451E-12 | 6.47711E-13 | 13 |
| 429 | Cell&Exosomes | R-HSA-114608  | Platelet degranulation                                                                                   | 18/162 | 127/10723 | 5.13152E-13 | 2.30918E-12 | 6.57586E-13 | 18 |
| 430 | Cell&Exosomes | R-HSA-180585  | ViF-mediated degradation of APOBEC3G                                                                     | 13/162 | 53/10723  | 6.56268E-13 | 2.89037E-12 | 8.20391E-13 | 13 |
| 431 | Cell&Exosomes | R-HSA-2995450 | FBX17 down-regulates ATRX during mitotic entry and in early mitosis                                      | 13/162 | 53/10723  | 6.56268E-13 | 2.89037E-12 | 8.20391E-13 | 13 |
| 432 | Cell&Exosomes | R-HSA-9604233 | Negative regulation of NOTCH4 signaling                                                                  | 13/162 | 53/10723  | 6.56268E-13 | 2.89037E-12 | 8.20391E-13 | 13 |
| 433 | Cell&Exosomes | R-HSA-391251  | Protein folding                                                                                          | 16/162 | 95/10723  | 6.87877E-13 | 3.0083E-12  | 8.56672E-13 | 16 |
| 434 | Cell&Exosomes | R-HSA-5693532 | DNA Double-Strand Break Repair                                                                           | 19/162 | 148/10723 | 6.95694E-13 | 3.02116E-12 | 8.60336E-13 | 19 |
| 435 | Cell&Exosomes | R-HSA-174113  | SCF beta-TCP-mediated degradation of Emi1                                                                | 13/162 | 85/10723  | 8.53179E-13 | 3.65396E-12 | 1.04054E-12 | 13 |
| 436 | Cell&Exosomes | R-HSA-4641257 | Degradation of AKIN                                                                                      | 13/162 | 54/10723  | 8.53179E-13 | 3.65396E-12 | 1.04054E-12 | 13 |
| 437 | Cell&Exosomes | R-HSA-76005   | Response to elevated platelet cytosolic Ca2+                                                             | 18/162 | 132/10723 | 1.0137E-12  | 4.31171E-12 | 1.22784E-12 | 18 |
| 438 | Cell&Exosomes | R-HSA-4641258 | Degradation of DVL                                                                                       | 13/162 | 56/10723  | 1.41766E-12 | 5.90848E-12 | 1.68256E-12 | 13 |
| 439 | Cell&Exosomes | R-HSA-69541   | Stabilization of p53                                                                                     | 13/162 | 56/10723  | 1.41766E-12 | 5.90848E-12 | 1.68256E-12 | 13 |
| 440 | Cell&Exosomes | R-HSA-8912319 | RC3 sensing by NF212                                                                                     | 13/162 | 56/10723  | 1.41766E-12 | 5.90848E-12 | 1.68256E-12 | 13 |
| 441 | Cell&Exosomes | R-HSA-70171   | Glycolysis                                                                                               | 14/162 | 71/10723  | 2.09566E-12 | 8.67601E-12 | 2.47067E-12 | 14 |
| 442 | Cell&Exosomes | R-HSA-5676590 | NIK--noncanonical NF-kB signaling                                                                        | 13/162 | 58/10723  | 2.30625E-12 | 9.42223E-12 | 2.68317E-12 | 13 |
| 443 | Cell&Exosomes | R-HSA-68827   | CDT1 association with the CDC6-ORC-origins complex                                                       | 13/162 | 58/10723  | 2.30625E-12 | 9.42223E-12 | 2.68317E-12 | 13 |
| 444 | Cell&Exosomes | R-HSA-5607161 | Dectin-1-mediated noncanonical NF-kB signaling                                                           | 13/162 | 59/10723  | 2.59197E-12 | 1.16229E-11 | 3.30986E-12 | 13 |
| 445 | Cell&Exosomes | R-HSA-5610780 | Degradation of GIL1 by the proteasome                                                                    | 13/162 | 59/10723  | 2.59197E-12 | 1.16229E-11 | 3.30986E-12 | 13 |
| 446 | Cell&Exosomes | R-HSA-5610783 | Degradation of GIL1 by the proteasome                                                                    | 13/162 | 59/10723  | 2.59197E-12 | 1.16229E-11 | 3.30986E-12 | 13 |
| 447 | Cell&Exosomes | R-HSA-5610785 | GIL1 is processed to GLI1R by the proteasome                                                             | 13/162 | 59/10723  | 2.59197E-12 | 1.16229E-11 | 3.30986E-12 | 13 |
| 448 | Cell&Exosomes | R-HSA-442755  | Activation of NMDA receptors and postsynaptic events                                                     | 15/162 | 88/10723  | 3.10833E-12 | 1.27868E-11 | 3.49891E-12 | 15 |
| 449 | Cell&Exosomes | R-HSA-4086400 | PCP/CE pathway                                                                                           | 15/162 | 91/10723  | 5.16291E-12 | 2.09222E-11 | 5.77861E-12 | 15 |
| 450 | Cell&Exosomes | R-HSA-5619084 | ABC transporter disorders                                                                                | 14/162 | 76/10723  | 5.60652E-12 | 2.18972E-11 | 6.23566E-12 | 14 |
| 451 | Cell&Exosomes | R-HSA-4608870 | Asymmetric localization of PCP proteins                                                                  | 13/162 | 63/10723  | 7.16887E-12 | 2.74242E-11 | 7.92348E-12 | 13 |
| 452 | Cell&Exosomes | R-HSA-1612909 | Host interaction of HIV factors                                                                          | 17/162 | 129/10723 | 7.88213E-12 | 3.04031E-11 | 8.65794E-12 | 17 |
| 453 | Cell&Exosomes | R-HSA-9707587 | Regulation of HMOX1 expression and activity                                                              | 13/162 | 64/10723  | 8.87791E-12 | 3.40396E-11 | 9.69347E-12 | 13 |
| 454 | Cell&Exosomes | R-HSA-1234176 | Oxygen-dependent proline hydroxylation of Hypoxia-inducible Factor Alpha                                 | 13/162 | 65/10723  | 1.09564E-11 | 4.12358E-11 | 1.17427E-11 | 13 |
| 455 | Cell&Exosomes | R-HSA-69563   | p53-Dependent G1 DNA Damage Response                                                                     | 13/162 | 65/10723  | 1.09564E-11 | 4.12358E-11 | 1.17427E-11 | 13 |
| 456 | Cell&Exosomes | R-HSA-69560   | p53-Dependent G1/S DNA damage checkpoint                                                                 | 13/162 | 65/10723  | 1.09564E-11 | 4.12358E-11 | 1.17427E-11 | 13 |
| 457 | Cell&Exosomes | R-HSA-1168372 | Downstream signaling events of B Cell Receptor (BCR)                                                     | 14/162 | 80/10723  | 1.15679E-11 | 4.63929E-11 | 1.24424E-11 | 14 |
| 458 | Cell&Exosomes | R-HSA-1169091 | Activation of NF-kappaB in B cells                                                                       | 13/162 | 66/10723  | 1.34674E-11 | 5.00793E-11 | 1.42611E-11 | 13 |
| 459 | Cell&Exosomes | R-HSA-9013694 | Signaling by NOTCH4                                                                                      | 14/162 | 81/10723  | 1.39377E-11 | 5.15195E-11 | 1.46712E-11 | 14 |
| 460 | Cell&Exosomes | R-HSA-174154  | APC/C-Cdc20 mediated degradation of Securin                                                              | 13/162 | 70/10723  | 1.64935E-11 | 5.95491E-11 | 1.69578E-11 | 13 |
| 461 | Cell&Exosomes | R-HSA-5658442 | Regulation of RAS by GAPs                                                                                | 13/162 | 67/10723  | 1.64935E-11 | 5.95491E-11 | 1.69578E-11 | 13 |
| 462 | Cell&Exosomes | R-HSA-68867   | Assembly of the pre-replicative complex                                                                  | 13/162 | 67/10723  | 1.64935E-11 | 5.95491E-11 | 1.69578E-11 | 13 |
| 463 | Cell&Exosomes | R-HSA-69615   | G1/S DNA Damage Checkpoints                                                                              | 13/162 | 67/10723  | 1.64935E-11 | 5.95491E-11 | 1.69578E-11 | 13 |
| 464 | Cell&Exosomes | R-HSA-891458  | Regulation of HMOX1 expression and activity                                                              | 13/162 | 67/10723  | 1.64935E-11 | 5.95491E-11 | 1.69578E-11 | 13 |
| 465 | Cell&Exosomes | R-HSA-5663220 | RHO GTPase Activate Formins                                                                              | 17/162 | 136/10723 | 1.87576E-11 | 6.69452E-11 | 1.9064E-11  | 17 |
| 466 | Cell&Exosomes | R-HSA-8948751 | Regulation of PTEN stability and activity                                                                | 13/162 | 68/10723  | 2.01282E-11 | 7.14265E-11 | 2.03401E-11 | 13 |
| 467 | Cell&Exosomes | R-HSA-68949   | Orcl removal from chromatin                                                                              | 13/162 | 70/10723  | 2.96747E-11 | 1.04704E-10 | 2.98166E-11 | 13 |
| 468 | Cell&Exosomes | R-HSA-2132295 | MHC class II antigen presentation                                                                        | 16/162 | 121/10723 | 3.18319E-11 | 1.11681E-10 | 3.18035E-11 | 16 |
| 469 | Cell&Exosomes | R-HSA-174184  | Cdc20:Phospho-APC/C mediated degradation of Cyclin A                                                     | 13/162 | 72/10723  | 4.31909E-11 | 1.49008E-10 | 4.24331E-11 | 13 |
| 470 | Cell&Exosomes | R-HSA-69017   | CDK-mediated phosphorylation and removal of Cdc6                                                         | 13/162 | 72/10723  | 4.31909E-11 | 1.49008E-10 | 4.24331E-11 | 13 |
| 471 | Cell&Exosomes | R-HSA-8939902 | Regulation of RUNX2 expression and activity                                                              | 13/162 | 72/10723  | 4.31909E-11 | 1.49008E-10 | 4.24331E-11 | 13 |
| 472 | Cell&Exosomes | R-HSA-5617263 | APC/C-Cdh1 mediated degradation of Cdc20 and other APC/C targeted proteins in late mitosis/early G1      | 13/162 | 73/10723  | 5.18894E-11 | 1.76983E-10 | 5.03994E-11 | 13 |
| 473 | Cell&Exosomes | R-HSA-179419  | APC/Cdc20 mediated degradation of cell cycle proteins prior to satisfaction of the cell cycle checkpoint | 13/162 | 73/10723  | 5.18894E-11 | 1.76983E-10 | 5.03994E-11 | 13 |
| 474 | Cell&Exosomes | R-HSA-187577  | SCF(Skp2)-mediated degradation of p27/p21                                                                | 12/162 | 58/10723  | 5.69085E-11 | 1.93116E-10 | 5.49935E-11 | 12 |
| 475 | Cell&Exosomes | R-HSA-1234174 | Cellular response to hypoxia                                                                             | 13/162 | 74/10723  | 6.21098E-11 | 2.09621E-10 | 5.96937E-11 | 13 |
| 476 | Cell&Exosomes | R-HSA-71387   | Metabolism of carbohydrates                                                                              | 23/162 | 191/10723 | 6.57812E-11 | 2.20811E-10 | 6.28804E-11 | 23 |
| 477 | Cell&Exosomes | R-HSA-70326   | Glucose metabolism                                                                                       | 14/162 | 91/10723  | 7.36896E-11 | 2.39375E-10 | 6.68168E-11 | 14 |
| 478 | Cell&Exosomes | R-HSA-176409  | APC/C-Cdc20 mediated degradation of mitotic proteins                                                     | 13/162 | 75/10723  | 7.41613E-11 | 2.46279E-10 | 7.01328E-11 | 13 |
| 479 | Cell&Exosomes | R-HSA-176814  | Activation of APC/C and APC/C-Cdc20 mediated degradation of mitotic proteins                             | 13/162 | 76/10723  | 8.84075E-11 | 2.91697E-10 | 8.30664E-11 | 13 |
| 480 | Cell&Exosomes | R-HSA-5617333 | ClpX Assembly                                                                                            | 19/162 | 198/10723 | 1.35244E-10 | 4.144E-10   | 1.18121E-10 | 19 |
| 481 | Cell&Exosomes | R-HSA-174084  | Autodegradation of Cdh1 by Cdh1/APC/C                                                                    | 12/162 | 63/10723  | 1.28767E-10 | 4.20844E-10 | 1.1985E-10  | 12 |
| 482 | Cell&Exosomes | R-HSA-6811434 | COP1-dependent Golgi-to-ER retrograde traffic                                                            | 14/162 | 96/10723  | 1.505E-10   | 4.88003E-10 | 1.38968E-10 | 14 |
| 483 | Cell&Exosomes | R-HSA-5673001 | RAF/MAP kinase cascade                                                                                   | 22/162 | 276/10723 | 1.50888E-10 | 4.88003E-10 | 1.38968E-10 | 22 |
| 484 | Cell&Exosomes | R-HSA-176408  | Regulation of APC/C activators between G1/S and early anaphase                                           | 13/162 | 80/10723  | 1.72972E-10 | 5.5369E-10  | 1.57674E-10 | 13 |
| 485 | Cell&Exosomes | R-HSA-2871837 | FcER1 mediated NF-kB activation                                                                          | 13/162 | 80/10723  | 1.72972E-10 | 5.5369E-10  | 1.57674E-10 | 13 |
| 486 | Cell&Exosomes | R-HSA-6807878 | COP1-mediated anterograde transport                                                                      | 14/162 | 98/10723  | 1.99929E-10 | 6.36697E-10 | 1.81312E-10 | 14 |
| 487 | Cell&Exosomes | R-HSA-9711123 | Cellular response to chemical stress                                                                     | 17/162 | 158/10723 | 2.09854E-10 | 6.64893E-10 | 1.89342E-10 | 17 |
| 488 | Cell&Exosomes | R-HSA-5684959 | MAPK1/MAPK3 signaling                                                                                    | 22/162 | 282/10723 | 2.28521E-10 | 7.20363E-10 | 2.05138E-10 | 22 |
| 489 | Cell&Exosomes | R-HSA-5620924 | Intracellular transport                                                                                  | 11/162 | 42/10723  | 2.3501E-10  | 7.38989E-10 | 2.10431E-10 | 11 |
| 490 | Cell&Exosomes | R-HSA-195253  | Degradation of beta-catenin by the destruction complex                                                   | 13/162 | 82/10723  | 2.35858E-10 | 7.44475E-10 | 2.12004E-10 | 13 |
| 491 | Cell&Exosomes | R-HSA-5632684 | Hedgehog 'on' state                                                                                      | 13/162 | 84/10723  | 3.26066E-10 | 1.0074E-09  | 2.86877E-10 | 13 |
| 492 | Cell&Exosomes | R-HSA-69002   | DNA Replication Preinitiation                                                                            | 13/162 | 84/10723  | 3.26066E-10 | 1.0074E-09  | 2.86877E-10 | 13 |
| 493 | Cell&Exosomes | R-HSA-760021  | Platelet activation, signaling and aggregation                                                           | 21/162 | 261/10723 | 3.44142E-10 | 1.05797E-09 | 3.01265E-10 | 21 |
| 494 | Cell&Exosomes | R-HSA-382556  | ABC-family proteins mediated cell cycle proteins                                                         | 14/162 | 102/10723 | 3.45869E-10 | 1.05805E-09 | 3.01302E-10 | 14 |
| 495 | Cell&Exosomes | R-HSA-174143  | APC/C-mediated degradation of cell cycle proteins                                                        | 13/162 | 87/10723  | 5.12738E-10 | 1.55322E-09 | 4.42311E-10 | 13 |
| 496 | Cell&Exosomes | R-HSA-453276  | Regulation of mitotic cell cycle                                                                         | 13/162 | 87/10723  | 5.12738E-10 | 1.55322E-09 | 4.42311E-10 | 13 |
| 497 | Cell&Exosomes | R-HSA-5687128 | MAPK5/MAPK6 signaling                                                                                    | 13/162 | 88/10723  | 5.93827E-10 | 1.79014E-09 | 5.09779E-10 | 13 |
| 498 | Cell&Exosomes | R-HSA-9613829 | Chaperone Mediated Autophagy                                                                             | 8/162  | 22/10723  | 6.09785E-10 | 1.82935E-09 | 5.20945E-10 | 8  |
| 499 | Cell&Exosomes | R-HSA-1236974 | ER-Phagosome pathway                                                                                     | 13/162 | 89/10723  | 6.86415E-10 |             |             |    |

|     |               |               |                                                                                       |        |           |             |             |             |    |
|-----|---------------|---------------|---------------------------------------------------------------------------------------|--------|-----------|-------------|-------------|-------------|----|
| 540 | Cell&Exosomes | R-HSA-351202  | Metabolism of polyamines                                                              | 9/162  | 58/10723  | 1.85513E07  | 4.62665E07  | 1.31751E05  | 9  |
| 541 | Cell&Exosomes | R-HSA-449147  | Signaling by Interleukins                                                             | 23/162 | 446/10723 | 2.28235E07  | 5.60935E07  | 1.61446E07  | 23 |
| 542 | Cell&Exosomes | R-HSA-901053  | Regulation of expression of SLTs and ROROs                                            | 14/162 | 170/10723 | 2.67443E07  | 6.61681E07  | 1.88427E07  | 14 |
| 543 | Cell&Exosomes | R-HSA-6802946 | Signaling by moderate kinase activity BRAF mutants                                    | 8/162  | 45/10723  | 3.06005E07  | 7.45212E07  | 2.12214E07  | 8  |
| 544 | Cell&Exosomes | R-HSA-6802949 | Signaling by RAS mutants                                                              | 8/162  | 45/10723  | 3.06005E07  | 7.45212E07  | 2.12214E07  | 8  |
| 545 | Cell&Exosomes | R-HSA-6802955 | Paradoxical activation of RAF signaling by kinase inactive BRAF                       | 8/162  | 45/10723  | 3.06005E07  | 7.45212E07  | 2.12214E07  | 8  |
| 546 | Cell&Exosomes | R-HSA-9649548 | Signaling downstream of RAS mutants                                                   | 8/162  | 45/10723  | 3.06005E07  | 7.45212E07  | 2.12214E07  | 8  |
| 547 | Cell&Exosomes | R-HSA-6811442 | Intra-Golgi and retrograde Golgi-to-ER traffic                                        | 15/162 | 199/10723 | 3.31762E07  | 7.58693E07  | 2.16053E07  | 15 |
| 548 | Cell&Exosomes | R-HSA-112314  | Neurotransmitter receptors and postsynaptic signal transduction                       | 15/162 | 200/10723 | 3.33747E07  | 8.06447E07  | 2.29552E07  | 15 |
| 549 | Cell&Exosomes | R-HSA-5619115 | Disorders of transmembrane transporters                                               | 14/162 | 174/10723 | 3.56164E07  | 8.57279E07  | 2.44127E07  | 14 |
| 550 | Cell&Exosomes | R-HSA-691206  | GLT5 Transition                                                                       | 12/162 | 130/10723 | 5.81555E07  | 1.20437E06  | 3.97075E07  | 12 |
| 551 | Cell&Exosomes | R-HSA-948021  | Transport to the Golgi and subsequent modification                                    | 14/162 | 182/10723 | 6.16913E07  | 1.47347E06  | 4.19601E07  | 14 |
| 552 | Cell&Exosomes | R-HSA-3371751 | HSF1-dependent transactivation                                                        | 6/162  | 23/10723  | 8.84423E07  | 2.10432E06  | 5.99246E07  | 6  |
| 553 | Cell&Exosomes | R-HSA-69242   | S Phase                                                                               | 13/162 | 161/10723 | 9.11665E07  | 2.16086E06  | 6.15347E07  | 13 |
| 554 | Cell&Exosomes | R-HSA-8982491 | Glycogen metabolism                                                                   | 8/162  | 26/10723  | 1.94279E06  | 4.58755E06  | 1.30634E06  | 8  |
| 555 | Cell&Exosomes | R-HSA-9656223 | Signaling by RAF1 mutants                                                             | 7/162  | 41/10723  | 2.30318E06  | 5.41771E06  | 1.5428E06   | 7  |
| 556 | Cell&Exosomes | R-HSA-453279  | Mitotic G1 phase and G1/S transition                                                  | 12/162 | 148/10723 | 2.32871E06  | 5.4571E06   | 1.55402E06  | 12 |
| 557 | Cell&Exosomes | R-HSA-112315  | Transmission across Chemical Synapses                                                 | 16/162 | 265/10723 | 2.43802E06  | 5.69178E06  | 1.62085E06  | 16 |
| 558 | Cell&Exosomes | R-HSA-1129410 | Antiviral mechanism by PPV-stimulated genes                                           | 9/162  | 80/10723  | 3.04225E06  | 7.07578E06  | 2.01497E06  | 9  |
| 559 | Cell&Exosomes | R-HSA-6802952 | Signaling by BRAF and RAF fusions                                                     | 8/162  | 65/10723  | 5.54646E06  | 1.28521E05  | 3.65988E06  | 8  |
| 560 | Cell&Exosomes | R-HSA-380259  | Loss of Nip from mitotic centrosomes                                                  | 8/162  | 69/10723  | 8.72998E06  | 2.0079E05   | 5.71788E06  | 8  |
| 561 | Cell&Exosomes | R-HSA-380284  | Loss of proteins required for interphase microtubule organization from the centrosome | 8/162  | 69/10723  | 8.72998E06  | 2.0079E05   | 5.71788E06  | 8  |
| 562 | Cell&Exosomes | R-HSA-1169408 | ISC15a antiviral mechanism                                                            | 8/162  | 72/10723  | 1.20263E05  | 2.74571E05  | 7.81897E06  | 8  |
| 563 | Cell&Exosomes | R-HSA-8854518 | AURKA Activation by TPX2                                                              | 8/162  | 72/10723  | 1.20263E05  | 2.74571E05  | 7.81897E06  | 8  |
| 564 | Cell&Exosomes | R-HSA-9662361 | Sensory processing of sound by outer hair cells of the cochlea                        | 7/162  | 54/10723  | 1.5388E05   | 3.50036E05  | 9.96796E06  | 7  |
| 565 | Cell&Exosomes | R-HSA-8950505 | Gene and protein expression by JAK-STAT signaling after Interleukin-12 stimulation    | 6/162  | 37/10723  | 1.70984E05  | 3.87522E05  | 1.10354E05  | 6  |
| 566 | Cell&Exosomes | R-HSA-6802958 | IKKBTB2 GTPase cycle                                                                  | 5/162  | 23/10723  | 1.99790E05  | 4.51114E05  | 1.28464E05  | 5  |
| 567 | Cell&Exosomes | R-HSA-3802770 | Recruitment of mitotic centrosome proteins and complexes                              | 8/162  | 81/10723  | 2.88076E05  | 6.45831E05  | 1.83913E05  | 8  |
| 568 | Cell&Exosomes | R-HSA-380287  | Centrosome maturation                                                                 | 8/162  | 81/10723  | 2.88076E05  | 6.45831E05  | 1.83913E05  | 8  |
| 569 | Cell&Exosomes | R-HSA-1643713 | Signaling by EGFR in Cancer                                                           | 5/162  | 25/10723  | 3.0781E05   | 6.87591E05  | 1.95805E05  | 5  |
| 570 | Cell&Exosomes | R-HSA-6802957 | Oncogenic MAPK signaling                                                              | 8/162  | 69/10723  | 3.15169E05  | 7.01505E05  | 1.99788E05  | 8  |
| 571 | Cell&Exosomes | R-HSA-5675221 | Neurotrophic regulation of MAPK pathway                                               | 6/162  | 43/10723  | 4.16051E05  | 9.22742E05  | 2.62769E05  | 6  |
| 572 | Cell&Exosomes | R-HSA-5628897 | TP53 Regulates Metabolic Genes                                                        | 8/162  | 87/10723  | 4.84764E05  | 0.000107131 | 3.05077E05  | 8  |
| 573 | Cell&Exosomes | R-HSA-8951664 | Neddylaton                                                                            | 13/162 | 232/10723 | 4.87921E05  | 0.000107446 | 3.05975E05  | 13 |
| 574 | Cell&Exosomes | R-HSA-162588  | Budding and maturation of HIV virion                                                  | 5/162  | 28/10723  | 5.48912E05  | 0.00012045  | 3.43006E05  | 5  |
| 575 | Cell&Exosomes | R-HSA-9020591 | Interleukin-12 signaling                                                              | 6/162  | 46/10723  | 6.15778E05  | 0.000134648 | 3.81343E05  | 6  |
| 576 | Cell&Exosomes | R-HSA-5213460 | RIPK1-mediated regulated necrosis                                                     | 5/162  | 29/10723  | 6.55225E05  | 0.000141775 | 4.03733E05  | 5  |
| 577 | Cell&Exosomes | R-HSA-5675482 | Regulation of necroptotic cell death                                                  | 5/162  | 29/10723  | 6.55225E05  | 0.000141775 | 4.03733E05  | 5  |
| 578 | Cell&Exosomes | R-HSA-8863795 | Downregulation of ERBB2 signaling                                                     | 5/162  | 29/10723  | 6.55225E05  | 0.000141775 | 4.03733E05  | 5  |
| 579 | Cell&Exosomes | R-HSA-8856828 | Citric acid-mediated endocytosis                                                      | 10/162 | 145/10723 | 6.7247E05   | 0.000143122 | 4.19272E05  | 10 |
| 580 | Cell&Exosomes | R-HSA-3371453 | Regulation of HSF1-mediated heat shock response                                       | 7/162  | 68/10723  | 7.05678E05  | 0.000151635 | 4.31812E05  | 7  |
| 581 | Cell&Exosomes | R-HSA-114452  | Activation of BHL-ONLY proteins                                                       | 5/162  | 30/10723  | 7.76738E05  | 0.000165757 | 4.7027E05   | 5  |
| 582 | Cell&Exosomes | R-HSA-8866652 | Synthesis of active ubiquitin: roles of E1 and E2 enzymes                             | 5/162  | 30/10723  | 7.76738E05  | 0.000165757 | 4.7027E05   | 5  |
| 583 | Cell&Exosomes | R-HSA-5620912 | Anchoring of the basal body to the plasma membrane                                    | 8/162  | 97/10723  | 0.000195317 | 0.000214446 | 6.39155E05  | 8  |
| 584 | Cell&Exosomes | R-HSA-9659379 | Sensory processing of sound                                                           | 7/162  | 76/10723  | 0.000143852 | 0.000304888 | 8.6229E05   | 7  |
| 585 | Cell&Exosomes | R-HSA-9615710 | Late endosomal microautophagy                                                         | 5/162  | 34/10723  | 0.000144448 | 0.000305111 | 8.68826E05  | 5  |
| 586 | Cell&Exosomes | R-HSA-5312668 | N-glycan trimming in the ER and Calnexin/Calreticulin cycle                           | 5/162  | 35/10723  | 0.000166483 | 0.000349277 | 9.9436E05   | 5  |
| 587 | Cell&Exosomes | R-HSA-9706574 | RHOBTX GTPase Cycle                                                                   | 5/162  | 35/10723  | 0.000166483 | 0.000349277 | 9.9436E05   | 5  |
| 588 | Cell&Exosomes | R-HSA-1256704 | PI3P activates Akt signaling                                                          | 13/162 | 265/10723 | 0.000166874 | 0.000390736 | 0.00011277  | 13 |
| 589 | Cell&Exosomes | R-HSA-447115  | Interleukin-12 family signaling                                                       | 6/162  | 56/10723  | 0.000188474 | 0.00039276  | 0.00011844  | 6  |
| 590 | Cell&Exosomes | R-HSA-8876384 | Listeria monocytogenes entry into host cells                                          | 4/162  | 20/10723  | 0.000201357 | 0.000418204 | 0.000119092 | 4  |
| 591 | Cell&Exosomes | R-HSA-445355  | Smooth Muscle Contraction                                                             | 8/162  | 97/10723  | 0.000218167 | 0.00045069  | 0.00012834  | 8  |
| 592 | Cell&Exosomes | R-HSA-983168  | Antigen processing: Ubiquitination & Proteasome degradation                           | 14/162 | 306/10723 | 0.00021845  | 0.00045069  | 0.00012834  | 14 |
| 593 | Cell&Exosomes | R-HSA-4641263 | Regulation of F20 by ubiquitination                                                   | 4/162  | 21/10723  | 0.000245823 | 0.000502158 | 0.000142999 | 4  |
| 594 | Cell&Exosomes | R-HSA-6807004 | Negative regulation of MET activity                                                   | 4/162  | 21/10723  | 0.000245823 | 0.000502158 | 0.000142999 | 4  |
| 595 | Cell&Exosomes | R-HSA-9010312 | ER Quality Control Compartment (ERQC)                                                 | 4/162  | 21/10723  | 0.000245823 | 0.000502158 | 0.000142999 | 4  |
| 596 | Cell&Exosomes | R-HSA-5689896 | Ovarian tumor domain proteases                                                        | 5/162  | 38/10723  | 0.000248184 | 0.000503668 | 0.00014343  | 5  |
| 597 | Cell&Exosomes | R-HSA-5696394 | DNA Damage Recognition in GG-NER                                                      | 5/162  | 38/10723  | 0.000248184 | 0.000503668 | 0.00014343  | 5  |
| 598 | Cell&Exosomes | R-HSA-110313  | Transduction synthesis by T family DNA polymerases bypasses lesions on DNA template   | 5/162  | 39/10723  | 0.00028124  | 0.000568893 | 0.000142004 | 5  |
| 599 | Cell&Exosomes | R-HSA-9670291 | NOTCH1 Activation and Transduction                                                    | 4/162  | 22/10723  | 0.000236933 | 0.000529111 | 0.000168843 | 4  |
| 600 | Cell&Exosomes | R-HSA-450321  | INK (c-Jun kinase) phosphorylation and activation mediated by activated human TAK1    | 4/162  | 22/10723  | 0.000236933 | 0.000529111 | 0.000168843 | 4  |
| 601 | Cell&Exosomes | R-HSA-5205685 | PINK1-PRKN Mediated Mitophagy                                                         | 4/162  | 22/10723  | 0.000236933 | 0.000529111 | 0.000168843 | 4  |
| 602 | Cell&Exosomes | R-HSA-912631  | Regulation of signaling by CBL                                                        | 4/162  | 22/10723  | 0.000236933 | 0.000529111 | 0.000168843 | 4  |
| 603 | Cell&Exosomes | R-HSA-2025482 | Regulation of actin dynamics for phagocytic cup formation                             | 4/162  | 22/10723  | 0.000236933 | 0.000529111 | 0.000168843 | 4  |
| 604 | Cell&Exosomes | R-HSA-2173795 | Downregulation of SMAD2/3-SMAD4 transcriptional activity                              | 4/162  | 23/10723  | 0.00035524  | 0.000700329 | 0.000195433 | 4  |
| 605 | Cell&Exosomes | R-HSA-450302  | Activated TAK1 mediates p38 MAPK activation                                           | 4/162  | 23/10723  | 0.00035524  | 0.000700329 | 0.000195433 | 4  |
| 606 | Cell&Exosomes | R-HSA-937041  | IKK complex recruitment mediated by RIP1                                              | 4/162  | 23/10723  | 0.00035524  | 0.000700329 | 0.000195433 | 4  |
| 607 | Cell&Exosomes | R-HSA-2769402 | Deactivation of the beta-catenin transactivating complex                              | 4/162  | 24/10723  | 0.000400645 | 0.00073744  | 0.00024212  | 4  |
| 608 | Cell&Exosomes | R-HSA-112316  | Neuronal System                                                                       | 16/162 | 406/10723 | 0.000409325 | 0.000801687 | 0.00028296  | 16 |
| 609 | Cell&Exosomes | R-HSA-174048  | APC/Cdc20 mediated degradation of Cyclin B                                            | 4/162  | 24/10723  | 0.000421302 | 0.000820152 | 0.000233555 | 4  |
| 610 | Cell&Exosomes | R-HSA-9648002 | RAS processing                                                                        | 4/162  | 24/10723  | 0.000421302 | 0.000820152 | 0.000233555 | 4  |
| 611 | Cell&Exosomes | R-HSA-5696397 | GAP-filling DNA repair synthesis and ligation in GG-NER                               | 4/162  | 25/10723  | 0.000455687 | 0.000955968 | 0.000272231 | 4  |
| 612 | Cell&Exosomes | R-HSA-9013507 | NOTCH3 Activation and Transduction of Signal to the Nucleus                           | 4/162  | 25/10723  | 0.000455687 | 0.000955968 | 0.000272231 | 4  |
| 613 | Cell&Exosomes | R-HSA-9705462 | Inactivation of CSF3 (G-CSF) signaling                                                | 4/162  | 25/10723  | 0.000455687 | 0.000955968 | 0.000272231 | 4  |
| 614 | Cell&Exosomes | R-HSA-156842  | Eukaryotic Translation Elongation                                                     | 7/162  | 93/10723  | 0.000503201 | 0.000987455 | 0.000275502 | 7  |
| 615 | Cell&Exosomes | R-HSA-983169  | Class I MHC mediated antigen processing & presentation                                | 15/162 | 374/10723 | 0.000532553 | 0.01030727  | 0.000296672 | 15 |
| 616 | Cell&Exosomes | R-HSA-179409  | APC-Cdc20 mediated degradation of Nck2A                                               | 4/162  | 26/10723  | 0.000578967 | 0.01099506  | 0.000311106 | 4  |
| 617 | Cell&Exosomes | R-HSA-2173788 | Downregulation of TGF-beta receptor signaling                                         | 4/162  | 26/10723  | 0.000578967 | 0.01099506  | 0.000311106 | 4  |
| 618 | Cell&Exosomes | R-HSA-901042  | Calnexin/calreticulin cycle                                                           | 4/162  | 26/10723  | 0.000578967 | 0.01099506  | 0.000311106 | 4  |
| 619 | Cell&Exosomes | R-HSA-9662360 | Sensory processing of sound by inner hair cells of the cochlea                        | 6/162  | 69/10723  | 0.000592177 | 0.011121164 | 0.000319274 | 6  |
| 620 | Cell&Exosomes | R-HSA-2006925 | Intracellular signaling by second messengers                                          | 13/162 | 395/10723 | 0.000718919 | 0.01356987  | 0.00038429  | 13 |
| 621 | Cell&Exosomes | R-HSA-512988  | Interleukin-3, Interleukin-5 and GM-CSF signaling                                     | 5/162  | 48/10723  | 0.000749808 | 0.01406739  | 0.000400597 | 5  |
| 622 | Cell&Exosomes | R-HSA-73893   | DNA Damage Byproducts                                                                 | 4/162  | 48/10723  | 0.000749808 | 0.01406739  | 0.000400597 | 4  |
| 623 | Cell&Exosomes | R-HSA-9682285 | FLT3 signaling in disease                                                             | 4/162  | 28/10723  | 0.000774524 | 0.01444382  | 0.00041316  | 4  |
| 624 | Cell&Exosomes | R-HSA-9683701 | Translation of structural proteins                                                    | 4/162  | 28/10723  | 0.000774524 | 0.01444382  | 0.00041316  | 4  |
| 625 | Cell&Exosomes | R-HSA-5205647 | Mitophagy                                                                             | 4/162  | 29/10723  | 0.00087964  | 0.01664046  | 0.00046744  | 4  |
| 626 | Cell&Exosomes | R-HSA-5654732 | Negative regulation of FGFR3 signaling                                                | 5/162  | 29/10723  | 0.00087964  | 0.01664046  | 0.00046744  | 5  |
| 627 | Cell&Exosomes | R-HSA-127986  | Signaling by ERBB2                                                                    | 4/162  | 50/10723  | 0.000909568 | 0.01668717  | 0.0004752   | 4  |
| 628 | Cell&Exosomes | R-HSA-9678108 | SARS-CoV-1 Infection                                                                  | 5/162  | 50/10723  | 0.000909568 | 0.01668717  | 0.0004752   | 5  |
| 629 | Cell&Exosomes | R-HSA-110314  | Recognition of DNA damage by PCNA-containing replication complex                      | 4/162  | 30/10723  | 0.01012624  | 0.01849527  | 0.00052669  | 4  |
| 630 | Cell&Exosomes | R-HSA-5357956 | TNFR1-induced NF-kappaB signaling pathway                                             | 4/162  | 30/10723  | 0.01012624  | 0.01849527  | 0.00052669  | 4  |
| 631 | Cell&Exosomes | R-HSA-9674555 | Signaling by CSF3 (G-CSF)                                                             | 4/162  | 30/10723  | 0.01012624  | 0.01849527  | 0.00052669  | 4  |
| 632 | Cell&Exosomes | R-HSA-8856825 | Cargo recognition for clathrin-mediated endocytosis                                   | 7/162  | 105/10723 | 0.01019745  | 0.0181495   | 0.00053921  | 7  |
| 633 | Cell&Exosomes | R-HSA-182971  | EGFR downregulation                                                                   | 4/162  | 31/10723  | 0.01114908  | 0.02068359  | 0.000589006 | 4  |
| 634 | Cell&Exosomes | R-HSA-2122948 | Activated NOTCH1 Transmits Signal to the Nucleus                                      | 4/162  | 31/10723  | 0.01114908  | 0.02068359  | 0.000589006 | 4  |
| 635 | Cell&Exosomes | R-HSA-5654733 | Negative regulation of FGFR4 signaling                                                | 4/162  | 31/10723  | 0.01114908  | 0.02068359  | 0.000589006 | 4  |
| 636 | Cell&Exosomes |               |                                                                                       |        |           |             |             |             |    |

|     |               |               |                                                                                                                             |        |           |             |             |             |    |
|-----|---------------|---------------|-----------------------------------------------------------------------------------------------------------------------------|--------|-----------|-------------|-------------|-------------|----|
| 675 | Cell&Exosomes | R-HSA-2173793 | Transcriptional activity of SMAD2/SMAD3-SMAD4 heterotrimer                                                                  | 4/162  | 44/10723  | 0.004258758 | 0.006851526 | 0.001951108 | 4  |
| 676 | Cell&Exosomes | R-HSA-75893   | TNF signaling                                                                                                               | 4/162  | 44/10723  | 0.004258758 | 0.006851526 | 0.001951108 | 4  |
| 677 | Cell&Exosomes | R-HSA-969443  | Translation of structural proteins                                                                                          | 4/162  | 44/10723  | 0.004258758 | 0.006851526 | 0.001951108 | 4  |
| 678 | Cell&Exosomes | R-HSA-373753  | Nephrin family interactions                                                                                                 | 3/162  | 23/10723  | 0.00480095  | 0.00770385  | 0.00213824  | 3  |
| 679 | Cell&Exosomes | R-HSA-69231   | Cyclin D associated events in G1                                                                                            | 4/162  | 47/10723  | 0.005403573 | 0.008626269 | 0.002456502 | 4  |
| 680 | Cell&Exosomes | R-HSA-69236   | G1 Phase                                                                                                                    | 4/162  | 47/10723  | 0.005403573 | 0.008626269 | 0.002456502 | 4  |
| 681 | Cell&Exosomes | R-HSA-204958  | Cell death signaling via NHRAGE, NRIF and NAE                                                                               | 5/162  | 76/10723  | 0.005769938 | 0.00917517  | 0.001616328 | 5  |
| 682 | Cell&Exosomes | R-HSA-2122947 | NOTCH1 Intracellular Domain Regulates Transcription                                                                         | 4/162  | 48/10723  | 0.005826642 | 0.009254079 | 0.002635283 | 4  |
| 683 | Cell&Exosomes | R-HSA-9012852 | Signaling by NOTCH3                                                                                                         | 4/162  | 49/10723  | 0.006271237 | 0.009934791 | 0.002829129 | 4  |
| 684 | Cell&Exosomes | R-HSA-177929  | Signaling by EGFR                                                                                                           | 4/162  | 50/10723  | 0.006737817 | 0.010619757 | 0.003024187 | 4  |
| 685 | Cell&Exosomes | R-HSA-5654736 | Signaling by FGFR1                                                                                                          | 4/162  | 50/10723  | 0.006737817 | 0.010619757 | 0.003024187 | 4  |
| 686 | Cell&Exosomes | R-HSA-354192  | Integrin signaling                                                                                                          | 3/162  | 27/10723  | 0.007587431 | 0.011928595 | 0.003396905 | 3  |
| 687 | Cell&Exosomes | R-HSA-6781823 | Formation of TC-NER Pre-Incision Complex                                                                                    | 4/162  | 53/10723  | 0.008273896 | 0.012974974 | 0.003694882 | 4  |
| 688 | Cell&Exosomes | R-HSA-5696399 | Global Genome Nucleotide Excision Repair (GG-NER)                                                                           | 5/162  | 84/10723  | 0.008759573 | 0.013702002 | 0.003901918 | 5  |
| 689 | Cell&Exosomes | R-HSA-8848021 | Signaling by PTXK                                                                                                           | 4/162  | 54/10723  | 0.008832788 | 0.013747272 | 0.003914809 | 4  |
| 690 | Cell&Exosomes | R-HSA-9006927 | Signaling by Non-Receptor Tyrosine Kinases                                                                                  | 4/162  | 54/10723  | 0.008832788 | 0.013747272 | 0.003914809 | 4  |
| 691 | Cell&Exosomes | R-HSA-397014  | Muscle contraction                                                                                                          | 8/162  | 194/10723 | 0.009191918 | 0.014270453 | 0.004063795 | 8  |
| 692 | Cell&Exosomes | R-HSA-5339562 | Uptake and actions of bacterial toxins                                                                                      | 3/162  | 29/10723  | 0.009272328 | 0.014359391 | 0.004089122 | 3  |
| 693 | Cell&Exosomes | R-HSA-154902  | Peptide chain elongation                                                                                                    | 5/162  | 89/10723  | 0.011093359 | 0.017135531 | 0.004879683 | 5  |
| 694 | Cell&Exosomes | R-HSA-1236394 | Signaling by ERBB4                                                                                                          | 4/162  | 58/10723  | 0.011313314 | 0.017135531 | 0.004879683 | 4  |
| 695 | Cell&Exosomes | R-HSA-2644602 | Signaling by NOTCH1 PEST Domain Mutants in Cancer                                                                           | 4/162  | 58/10723  | 0.011313314 | 0.017135531 | 0.004879683 | 4  |
| 696 | Cell&Exosomes | R-HSA-2644603 | Signaling by NOTCH1 in Cancer                                                                                               | 4/162  | 58/10723  | 0.011313314 | 0.017135531 | 0.004879683 | 4  |
| 697 | Cell&Exosomes | R-HSA-2644606 | Constitutive Signaling by NOTCH1 PEST Domain Mutants                                                                        | 4/162  | 58/10723  | 0.011313314 | 0.017135531 | 0.004879683 | 4  |
| 698 | Cell&Exosomes | R-HSA-2894858 | Signaling by NOTCH1 HD+PEST Domain Mutants in Cancer                                                                        | 4/162  | 58/10723  | 0.011313314 | 0.017135531 | 0.004879683 | 4  |
| 699 | Cell&Exosomes | R-HSA-2894862 | Constitutive Signaling by NOTCH1 HD+PEST Domain Mutants                                                                     | 4/162  | 58/10723  | 0.011313314 | 0.017135531 | 0.004879683 | 4  |
| 700 | Cell&Exosomes | R-HSA-72649   | Translation initiation complex formation                                                                                    | 4/162  | 58/10723  | 0.011313314 | 0.017135531 | 0.004879683 | 4  |
| 701 | Cell&Exosomes | R-HSA-72702   | Ribosomal scanning and start codon recognition                                                                              | 4/162  | 58/10723  | 0.011313314 | 0.017135531 | 0.004879683 | 4  |
| 702 | Cell&Exosomes | R-HSA-72663   | Activation of the mRNA upon binding of the cap-binding complex and eIFs, and subsequent binding to 43S                      | 4/162  | 59/10723  | 0.01199654  | 0.018126159 | 0.005161984 | 4  |
| 703 | Cell&Exosomes | R-HSA-2682334 | EPHr signaling                                                                                                              | 5/162  | 91/10723  | 0.012135288 | 0.018247007 | 0.005196198 | 5  |
| 704 | Cell&Exosomes | R-HSA-446728  | Cell junction organization                                                                                                  | 5/162  | 91/10723  | 0.012135288 | 0.018247007 | 0.005196198 | 5  |
| 705 | Cell&Exosomes | R-HSA-72766   | Translation                                                                                                                 | 10/162 | 291/10723 | 0.012846854 | 0.019270262 | 0.005497596 | 10 |
| 706 | Cell&Exosomes | R-HSA-180746  | Nuclear import of Rev protein                                                                                               | 3/162  | 33/10723  | 0.013250741 | 0.019828217 | 0.005646479 | 3  |
| 707 | Cell&Exosomes | R-HSA-1834949 | Cytosolic sensors of pathogen-associated DNA                                                                                | 4/162  | 63/10723  | 0.014992014 | 0.022326236 | 0.00635784  | 4  |
| 708 | Cell&Exosomes | R-HSA-450294  | MAP kinase activation                                                                                                       | 4/162  | 63/10723  | 0.014992014 | 0.022326236 | 0.00635784  | 4  |
| 709 | Cell&Exosomes | R-HSA-193704  | p75 NTR receptor-mediated signalling                                                                                        | 5/162  | 97/10723  | 0.015655273 | 0.023258193 | 0.006621233 | 5  |
| 710 | Cell&Exosomes | R-HSA-6782110 | Gap-filling DNA repair synthesis and ligation in TC-NER                                                                     | 4/162  | 60/10723  | 0.015800062 | 0.023429133 | 0.006671912 | 4  |
| 711 | Cell&Exosomes | R-HSA-6782135 | Dual incision in TC-NER                                                                                                     | 4/162  | 65/10723  | 0.015651553 | 0.02456203  | 0.006994527 | 4  |
| 712 | Cell&Exosomes | R-HSA-9614085 | FOXO-mediated transcription                                                                                                 | 4/162  | 65/10723  | 0.015651553 | 0.02456203  | 0.006994527 | 4  |
| 713 | Cell&Exosomes | R-HSA-177243  | Interactions of Rev with host cellular proteins                                                                             | 3/162  | 36/10723  | 0.016780755 | 0.024635547 | 0.007015462 | 3  |
| 714 | Cell&Exosomes | R-HSA-390522  | Striated Muscle Contraction                                                                                                 | 4/162  | 66/10723  | 0.016780755 | 0.024635547 | 0.007015462 | 4  |
| 715 | Cell&Exosomes | R-HSA-5685942 | HDR through Homologous Recombination (HRR)                                                                                  | 4/162  | 66/10723  | 0.017522749 | 0.025664214 | 0.007308396 | 4  |
| 716 | Cell&Exosomes | R-HSA-3299685 | Detoxification of Reactive Oxygen Species                                                                                   | 3/162  | 37/10723  | 0.018063006 | 0.026393239 | 0.0075516   | 3  |
| 717 | Cell&Exosomes | R-HSA-162599  | Late Phase of HIV Life Cycle                                                                                                | 6/162  | 138/10723 | 0.018183878 | 0.026507483 | 0.007545313 | 6  |
| 718 | Cell&Exosomes | R-HSA-400253  | Circadian Clock                                                                                                             | 4/162  | 69/10723  | 0.020304993 | 0.029530213 | 0.008409316 | 4  |
| 719 | Cell&Exosomes | R-HSA-76009   | Platelet Aggregation (Plug Formation)                                                                                       | 3/162  | 39/10723  | 0.020786967 | 0.030160529 | 0.008588111 | 3  |
| 720 | Cell&Exosomes | R-HSA-484824  | Interleukin-17 signaling                                                                                                    | 4/162  | 71/10723  | 0.022302576 | 0.032284149 | 0.009193554 | 4  |
| 721 | Cell&Exosomes | R-HSA-2173782 | Binding and uptake of Ligands by Scavenger Receptors                                                                        | 3/162  | 41/10723  | 0.023723991 | 0.034261857 | 0.009754745 | 3  |
| 722 | Cell&Exosomes | R-HSA-170834  | Signaling by TGF-beta Receptor Complex                                                                                      | 4/162  | 73/10723  | 0.02441618  | 0.035098259 | 0.009994927 | 4  |
| 723 | Cell&Exosomes | R-HSA-5654738 | Signaling by FGFR2                                                                                                          | 4/162  | 73/10723  | 0.02441618  | 0.035098259 | 0.009994927 | 4  |
| 724 | Cell&Exosomes | R-HSA-3928662 | EPHB-mediated forward signaling                                                                                             | 3/162  | 42/10723  | 0.025272431 | 0.036161704 | 0.010297765 | 3  |
| 725 | Cell&Exosomes | R-HSA-9035034 | RHO GTPase cycle                                                                                                            | 3/162  | 42/10723  | 0.025272431 | 0.036161704 | 0.010297765 | 3  |
| 726 | Cell&Exosomes | R-HSA-5696398 | Nucleotide Excision Repair                                                                                                  | 4/162  | 110/10723 | 0.025474304 | 0.036344004 | 0.010349689 | 4  |
| 727 | Cell&Exosomes | R-HSA-1980143 | Signaling by NOTCH1                                                                                                         | 4/162  | 74/10723  | 0.025516913 | 0.036344004 | 0.010349689 | 4  |
| 728 | Cell&Exosomes | R-HSA-156827  | L13A-mediated translational silencing of Ceruloplasmin expression                                                           | 5/162  | 111/10723 | 0.026365175 | 0.037461186 | 0.010667818 | 5  |
| 729 | Cell&Exosomes | R-HSA-162587  | HIV Life Cycle                                                                                                              | 6/162  | 151/10723 | 0.026908009 | 0.038151247 | 0.010864327 | 6  |
| 730 | Cell&Exosomes | R-HSA-72706   | GTP hydrolysis and joining of the 60S ribosomal subunit                                                                     | 4/162  | 112/10723 | 0.027128368 | 0.038573291 | 0.010984512 | 4  |
| 731 | Cell&Exosomes | R-HSA-6781827 | Transcription-Coupled Nucleotide Excision Repair (TC-NER)                                                                   | 4/162  | 78/10723  | 0.030216014 | 0.042645783 | 0.012144235 | 4  |
| 732 | Cell&Exosomes | R-HSA-72613   | Eukaryotic Translation Initiation                                                                                           | 5/162  | 119/10723 | 0.034173064 | 0.048012382 | 0.013672481 | 5  |
| 733 | Cell&Exosomes | R-HSA-72737   | Cap-dependent Translation Initiation                                                                                        | 5/162  | 119/10723 | 0.034173064 | 0.048012382 | 0.013672481 | 5  |
| 734 | Exosomes      | R-HSA-3000173 | ECM proteoglycans                                                                                                           | 19/89  | 75/10723  | 7.51596E-14 | 1.26288E-11 | 7.3377E-12  | 19 |
| 735 | Exosomes      | R-HSA-381426  | Regulation of Insulin-like Growth Factor (IGF) transport and uptake by insulin-like Growth Factor Binding Proteins (IGFBPs) | 21/89  | 125/10723 | 2.9708E-22  | 2.49547E-20 | 1.45413E-20 | 21 |
| 736 | Exosomes      | R-HSA-8957275 | Post-translational protein phosphorylation                                                                                  | 19/89  | 108/10723 | 1.40559E-20 | 7.87131E-19 | 4.58666E-19 | 19 |
| 737 | Exosomes      | R-HSA-1474244 | Extracellular matrix organization                                                                                           | 25/89  | 300/10723 | 9.1732E-19  | 3.85274E-17 | 2.24502E-17 | 25 |
| 738 | Exosomes      | R-HSA-216083  | Integrin cell surface interaction                                                                                           | 16/89  | 85/10723  | 6.1634E-18  | 2.07038E-16 | 1.20642E-16 | 16 |
| 739 | Exosomes      | R-HSA-3000171 | Non-integrin membrane-ECM interactions                                                                                      | 14/89  | 59/10723  | 2.49928E-17 | 6.99597E-16 | 4.07778E-16 | 14 |
| 740 | Exosomes      | R-HSA-114608  | Platelet degradation                                                                                                        | 17/89  | 127/10723 | 2.19917E-16 | 5.278E-15   | 3.07553E-15 | 17 |
| 741 | Exosomes      | R-HSA-76005   | Response to elevated platelet cytosolic Ca2+                                                                                | 17/89  | 132/10723 | 4.2922E-16  | 9.01367E-15 | 5.25232E-15 | 17 |
| 742 | Exosomes      | R-HSA-76002   | Platelet activation, signaling and aggregation                                                                              | 20/89  | 161/10723 | 2.27863E-14 | 4.25544E-13 | 2.47851E-13 | 20 |
| 743 | Exosomes      | R-HSA-977606  | Regulation of Complement cascade                                                                                            | 11/89  | 46/10723  | 7.1377E-14  | 1.20519E-12 | 7.02274E-13 | 11 |
| 744 | Exosomes      | R-HSA-166658  | Complement cascade                                                                                                          | 11/89  | 57/10723  | 9.21598E-13 | 1.40753E-11 | 8.20178E-12 | 11 |
| 745 | Exosomes      | R-HSA-8874081 | MET activates PI3K signaling                                                                                                | 9/89   | 30/10723  | 1.53329E-12 | 2.14661E-11 | 1.25084E-11 | 9  |
| 746 | Exosomes      | R-HSA-1474228 | Degradation of the extracellular matrix                                                                                     | 14/89  | 139/10723 | 6.49915E-12 | 8.3989E-11  | 4.8941E-11  | 14 |
| 747 | Exosomes      | R-HSA-140877  | Formation of Fibrin Clot (Clotting Cascade)                                                                                 | 9/89   | 39/10723  | 2.13731E-11 | 2.56477E-10 | 1.49451E-10 | 9  |
| 748 | Exosomes      | R-HSA-3000170 | Syndecan formation                                                                                                          | 8/89   | 27/10723  | 3.1902E-11  | 3.57303E-10 | 2.08203E-10 | 8  |
| 749 | Exosomes      | R-HSA-8875878 | MET promotes cell motility                                                                                                  | 9/89   | 41/10723  | 3.4861E-11  | 3.66041E-10 | 2.13294E-10 | 9  |
| 750 | Exosomes      | R-HSA-140875  | Common Pathway of Fibrin Clot Formation                                                                                     | 7/89   | 20/10723  | 3.29542E-10 | 3.25209E-09 | 1.89537E-09 | 7  |
| 751 | Exosomes      | R-HSA-6806834 | Signaling by MET                                                                                                            | 10/89  | 79/10723  | 8.34693E-10 | 7.79046E-09 | 4.53956E-09 | 10 |
| 752 | Exosomes      | R-HSA-186797  | Signaling by PDGF                                                                                                           | 9/89   | 58/10723  | 9.44796E-10 | 8.35398E-09 | 4.86792E-09 | 9  |
| 753 | Exosomes      | R-HSA-2173782 | Binding and Uptake of Ligands by Scavenger Receptors                                                                        | 8/89   | 41/10723  | 1.24934E-09 | 1.04945E-08 | 6.11521E-09 | 8  |
| 754 | Exosomes      | R-HSA-973634  | Retinoid metabolism and transport                                                                                           | 8/89   | 43/10723  | 1.87067E-09 | 1.49654E-08 | 8.70242E-09 | 8  |
| 755 | Exosomes      | R-HSA-8948216 | Collagen chain trimerization                                                                                                | 8/89   | 44/10723  | 2.27101E-09 | 1.78423E-08 | 1.01055E-08 | 8  |
| 756 | Exosomes      | R-HSA-6806667 | Metabolism of fat-soluble vitamins                                                                                          | 8/89   | 47/10723  | 3.9487E-09  | 2.88427E-08 | 1.68086E-08 | 8  |
| 757 | Exosomes      | R-HSA-140837  | Intrinsic Pathway of Fibrin Clot Formation                                                                                  | 6/89   | 23/10723  | 2.48451E-08 | 1.73916E-07 | 1.01342E-07 | 6  |
| 758 | Exosomes      | R-HSA-2022090 | Assembly of collagen fibrils and other multimeric structures                                                                | 8/89   | 63/10723  | 3.36484E-08 | 2.26118E-07 | 1.3176E-07  | 8  |
| 759 | Exosomes      | R-HSA-1442490 | Collagen degradation                                                                                                        | 8/89   | 64/10723  | 4.9562E-08  | 3.20248E-07 | 1.86611E-07 | 8  |
| 760 | Exosomes      | R-HSA-1650814 | Collagen biosynthesis and modifying enzymes                                                                                 | 8/89   | 67/10723  | 7.15723E-08 | 4.45339E-07 | 2.59502E-07 | 8  |
| 761 | Exosomes      | R-HSA-8963899 | Plasma lipoprotein remodeling                                                                                               | 6/89   | 30/10723  | 1.39491E-07 | 8.36945E-07 | 4.87693E-07 | 6  |
| 762 | Exosomes      | R-HSA-1474290 | Collagen formation                                                                                                          | 8/89   | 90/10723  | 7.28459E-07 | 4.22004E-06 | 2.45904E-06 | 8  |
| 763 | Exosomes      | R-HSA-413037  | NCAM1 interactions                                                                                                          | 6/89   | 42/10723  | 1.13785E-06 | 6.37197E-06 | 3.71299E-06 | 6  |
| 764 | Exosomes      | R-HSA-2187338 | Visual phototransduction                                                                                                    | 8/89   | 98/10723  | 1.40125E-06 | 7.59386E-06 | 4.425E-06   | 8  |
| 765 | Exosomes      | R-HSA-174824  | Plasma lipoprotein assembly, remodeling, and clearance                                                                      | 7/89   | 69/10723  | 1.51894E-06 | 7.97444E-06 | 4.64676E-06 | 7  |
| 766 | Exosomes      | R-HSA-3781865 | Diseases of glycosylation                                                                                                   | 9/89   | 141/10723 | 2.36995E-06 | 1.20652E-05 | 7.03049E-06 | 9  |
| 767 | Exosomes      | R-HSA-195854  | Metabolism of vitamins and cofactors                                                                                        | 10/89  | 187/10723 | 3.15379E-06 | 1.55844E-05 | 9.08058E-06 | 10 |
| 768 | Exosomes      | R-HSA-3000157 | Laminin interactions                                                                                                        | 5/89   | 30/10723  | 4.25518E-06 | 2.04249E-05 | 1.19017E-05 | 5  |
| 769 | Exosomes      | R-HSA-375165  | NCAM signaling for neurite out-growth                                                                                       | 6/89   | 63/10723  | 1.28194E-05 | 5.98238E-05 | 3.48597E-05 | 6  |
| 770 | Exosomes      | R-HSA-76009   | Platelet Aggregation (Plug Formation)                                                                                       | 5/89   | 39/10723  | 1.62105E-05 | 7.36044E-05 | 4.28989E-05 | 5  |
| 771 | Exosomes      | R-HSA-3550782 | Diseases associated with the glycosaminoglycan metabolism</                                                                 |        |           |             |             |             |    |
