# Supplementary material
Source: PubMed Central journal article supplement (PMC9484382)
Supplement: gutjnl-2021-324994supp015.pdf [file gutjnl-2021-324994supp015.pdf]

Table with 10 columns: Cluster ID, Description, chr, start, end, strand, orient, distance, count, count. The table lists various gene clusters such as R\_HSA-126272, R\_HSA-6951897, R\_HSA-424745, etc., along with their genomic coordinates and associated gene counts.



Table with 4 columns: Common ID, Gene Symbol, Gene Name, and RefSeq ID. The table lists various genes and their associated RefSeq identifiers, such as RASA4, RASA5, RASA6, etc., and their corresponding RefSeq IDs.









|     |              |                                             |        |            |              |             |             |                                                                                                                                                                                                                                                                                                                                                                                                                                                                                                                                                                                                                                                                                                                                                                                                                                                                                                                                                                                                                                                                                                                                                                                                                                                                                                                                                                                                                                                                                                                                                                                                                                                                                                                                                                                                                                                                                                                                                                                                                                                                                                                                                                                                                                                                                                                                                                                                                                                                                                                                                                                                                                                                                                                                                                                                                                                                                                                                                                                                                                                                                                                                                                                                                                                                                                                                                                                                                                                                                                                                                                                                                                                                                                                                                                                                                                                                                                                                                                                                                                                                                                                                                                                                                                                                                                                                                                                                                                                                                                                                                                                                                                                                                                                                                                                                                                                                                                                                                                                                                                                                                                                                                                                                                                                                                                                                                                                                                                                                                                                                                                                                                                                                                                                                                                               |    |
|-----|--------------|---------------------------------------------|--------|------------|--------------|-------------|-------------|-------------------------------------------------------------------------------------------------------------------------------------------------------------------------------------------------------------------------------------------------------------------------------------------------------------------------------------------------------------------------------------------------------------------------------------------------------------------------------------------------------------------------------------------------------------------------------------------------------------------------------------------------------------------------------------------------------------------------------------------------------------------------------------------------------------------------------------------------------------------------------------------------------------------------------------------------------------------------------------------------------------------------------------------------------------------------------------------------------------------------------------------------------------------------------------------------------------------------------------------------------------------------------------------------------------------------------------------------------------------------------------------------------------------------------------------------------------------------------------------------------------------------------------------------------------------------------------------------------------------------------------------------------------------------------------------------------------------------------------------------------------------------------------------------------------------------------------------------------------------------------------------------------------------------------------------------------------------------------------------------------------------------------------------------------------------------------------------------------------------------------------------------------------------------------------------------------------------------------------------------------------------------------------------------------------------------------------------------------------------------------------------------------------------------------------------------------------------------------------------------------------------------------------------------------------------------------------------------------------------------------------------------------------------------------------------------------------------------------------------------------------------------------------------------------------------------------------------------------------------------------------------------------------------------------------------------------------------------------------------------------------------------------------------------------------------------------------------------------------------------------------------------------------------------------------------------------------------------------------------------------------------------------------------------------------------------------------------------------------------------------------------------------------------------------------------------------------------------------------------------------------------------------------------------------------------------------------------------------------------------------------------------------------------------------------------------------------------------------------------------------------------------------------------------------------------------------------------------------------------------------------------------------------------------------------------------------------------------------------------------------------------------------------------------------------------------------------------------------------------------------------------------------------------------------------------------------------------------------------------------------------------------------------------------------------------------------------------------------------------------------------------------------------------------------------------------------------------------------------------------------------------------------------------------------------------------------------------------------------------------------------------------------------------------------------------------------------------------------------------------------------------------------------------------------------------------------------------------------------------------------------------------------------------------------------------------------------------------------------------------------------------------------------------------------------------------------------------------------------------------------------------------------------------------------------------------------------------------------------------------------------------------------------------------------------------------------------------------------------------------------------------------------------------------------------------------------------------------------------------------------------------------------------------------------------------------------------------------------------------------------------------------------------------------------------------------------------------------------------------------------------------------------|----|
| CSC | RHSA-2029481 | EGFR activation                             | 5/435  | 12/10856   | 6.329946e-05 | 0.000490635 | 0.000322728 | FYN/YES1/YN/HCX/FGFR                                                                                                                                                                                                                                                                                                                                                                                                                                                                                                                                                                                                                                                                                                                                                                                                                                                                                                                                                                                                                                                                                                                                                                                                                                                                                                                                                                                                                                                                                                                                                                                                                                                                                                                                                                                                                                                                                                                                                                                                                                                                                                                                                                                                                                                                                                                                                                                                                                                                                                                                                                                                                                                                                                                                                                                                                                                                                                                                                                                                                                                                                                                                                                                                                                                                                                                                                                                                                                                                                                                                                                                                                                                                                                                                                                                                                                                                                                                                                                                                                                                                                                                                                                                                                                                                                                                                                                                                                                                                                                                                                                                                                                                                                                                                                                                                                                                                                                                                                                                                                                                                                                                                                                                                                                                                                                                                                                                                                                                                                                                                                                                                                                                                                                                                                          |    |
| CSC | RHSA-1505901 | Activation of NF- $\kappa$ B in cells       | 5/435  | 6/710856   | 0.00009044   | 0.00000004  | 0.00000004  | PSMD12/PSMD3/PSMC3/PSMC4/PSMD8/PSMD7/PSM3/PSMC5/PSMD2/PSMD1/PSMD12                                                                                                                                                                                                                                                                                                                                                                                                                                                                                                                                                                                                                                                                                                                                                                                                                                                                                                                                                                                                                                                                                                                                                                                                                                                                                                                                                                                                                                                                                                                                                                                                                                                                                                                                                                                                                                                                                                                                                                                                                                                                                                                                                                                                                                                                                                                                                                                                                                                                                                                                                                                                                                                                                                                                                                                                                                                                                                                                                                                                                                                                                                                                                                                                                                                                                                                                                                                                                                                                                                                                                                                                                                                                                                                                                                                                                                                                                                                                                                                                                                                                                                                                                                                                                                                                                                                                                                                                                                                                                                                                                                                                                                                                                                                                                                                                                                                                                                                                                                                                                                                                                                                                                                                                                                                                                                                                                                                                                                                                                                                                                                                                                                                                                                            | 5  |
| CSC | RHSA-1257064 | PIP3 activates AKT signaling                | 25/435 | 26/710856  | 6.938737e-05 | 0.000306666 | 0.000349059 | PSMD12/PSMD3/EGFR/LCK/FYN/FGFR1/RAC2/PSMC3/FGFR2/FGFR4/FGFR3/PPP2R1B/PSMCA4/PSMD8/PSM7/PSM3                                                                                                                                                                                                                                                                                                                                                                                                                                                                                                                                                                                                                                                                                                                                                                                                                                                                                                                                                                                                                                                                                                                                                                                                                                                                                                                                                                                                                                                                                                                                                                                                                                                                                                                                                                                                                                                                                                                                                                                                                                                                                                                                                                                                                                                                                                                                                                                                                                                                                                                                                                                                                                                                                                                                                                                                                                                                                                                                                                                                                                                                                                                                                                                                                                                                                                                                                                                                                                                                                                                                                                                                                                                                                                                                                                                                                                                                                                                                                                                                                                                                                                                                                                                                                                                                                                                                                                                                                                                                                                                                                                                                                                                                                                                                                                                                                                                                                                                                                                                                                                                                                                                                                                                                                                                                                                                                                                                                                                                                                                                                                                                                                                                                                   | 25 |
| CSC | RHSA-174154  | APC/C-Cdc20 mediated degradation of Securin | 13/435 | 68/10856   | 7.33116e-05  | 0.000556862 | 0.000362629 | PSMD12/PSMD3/PSMC3/PSMC4/PSMD8/PSMD7/PSM3/PSMC5/PSMD2/PSMD1/PSMD12                                                                                                                                                                                                                                                                                                                                                                                                                                                                                                                                                                                                                                                                                                                                                                                                                                                                                                                                                                                                                                                                                                                                                                                                                                                                                                                                                                                                                                                                                                                                                                                                                                                                                                                                                                                                                                                                                                                                                                                                                                                                                                                                                                                                                                                                                                                                                                                                                                                                                                                                                                                                                                                                                                                                                                                                                                                                                                                                                                                                                                                                                                                                                                                                                                                                                                                                                                                                                                                                                                                                                                                                                                                                                                                                                                                                                                                                                                                                                                                                                                                                                                                                                                                                                                                                                                                                                                                                                                                                                                                                                                                                                                                                                                                                                                                                                                                                                                                                                                                                                                                                                                                                                                                                                                                                                                                                                                                                                                                                                                                                                                                                                                                                                                            | 13 |
| CSC | RHSA-184249  | Innate immune system                        | 9/335  | 1060/10856 | 9.153305e-05 | 0.000349059 | 0.000349059 | ATP5A1/ATP5B1/ATP5C1/ATP5D1/ATP5E1/ATP5F1/ATP5G1/ATP5H1/ATP5I1/ATP5J1/ATP5K1/ATP5L1/ATP5M1/ATP5N1/ATP5O1/ATP5P1/ATP5Q1/ATP5R1/ATP5S1/ATP5T1/ATP5U1/ATP5V1/ATP5W1/ATP5X1/ATP5Y1/ATP5Z1/ATP5AA1/ATP5AB1/ATP5AC1/ATP5AD1/ATP5AE1/ATP5AF1/ATP5AG1/ATP5AH1/ATP5AI1/ATP5AJ1/ATP5AK1/ATP5AL1/ATP5AM1/ATP5AN1/ATP5AO1/ATP5AP1/ATP5AQ1/ATP5AR1/ATP5AS1/ATP5AT1/ATP5AU1/ATP5AV1/ATP5AW1/ATP5AX1/ATP5AY1/ATP5AZ1/ATP5BA1/ATP5BB1/ATP5BC1/ATP5BD1/ATP5BE1/ATP5BF1/ATP5BG1/ATP5BH1/ATP5BI1/ATP5BJ1/ATP5BK1/ATP5BL1/ATP5BM1/ATP5BN1/ATP5BO1/ATP5BP1/ATP5BQ1/ATP5BR1/ATP5BS1/ATP5BT1/ATP5BU1/ATP5BV1/ATP5BW1/ATP5BX1/ATP5BY1/ATP5BZ1/ATP5CA1/ATP5CB1/ATP5CC1/ATP5CD1/ATP5CE1/ATP5CF1/ATP5CG1/ATP5CH1/ATP5CI1/ATP5CJ1/ATP5CK1/ATP5CL1/ATP5CM1/ATP5CN1/ATP5CO1/ATP5CP1/ATP5CQ1/ATP5CR1/ATP5CS1/ATP5CT1/ATP5CU1/ATP5CV1/ATP5CW1/ATP5CX1/ATP5CY1/ATP5CZ1/ATP5DA1/ATP5DB1/ATP5DC1/ATP5DD1/ATP5DE1/ATP5DF1/ATP5DG1/ATP5DH1/ATP5DI1/ATP5DJ1/ATP5DK1/ATP5DL1/ATP5DM1/ATP5DN1/ATP5DO1/ATP5DP1/ATP5DQ1/ATP5DR1/ATP5DS1/ATP5DT1/ATP5DU1/ATP5DV1/ATP5DW1/ATP5DX1/ATP5DY1/ATP5DZ1/ATP5EA1/ATP5EB1/ATP5EC1/ATP5ED1/ATP5EE1/ATP5EF1/ATP5EG1/ATP5EH1/ATP5EI1/ATP5EJ1/ATP5EK1/ATP5EL1/ATP5EM1/ATP5EN1/ATP5EO1/ATP5EP1/ATP5EQ1/ATP5ER1/ATP5ES1/ATP5ET1/ATP5EU1/ATP5EV1/ATP5EW1/ATP5EX1/ATP5EY1/ATP5EZ1/ATP5FA1/ATP5FB1/ATP5FC1/ATP5FD1/ATP5FE1/ATP5FF1/ATP5FG1/ATP5FH1/ATP5FI1/ATP5FJ1/ATP5FK1/ATP5FL1/ATP5FM1/ATP5FN1/ATP5FO1/ATP5FP1/ATP5FQ1/ATP5FR1/ATP5FS1/ATP5FT1/ATP5FU1/ATP5FV1/ATP5FW1/ATP5FX1/ATP5FY1/ATP5FZ1/ATP5GA1/ATP5GB1/ATP5GC1/ATP5GD1/ATP5GE1/ATP5GF1/ATP5GH1/ATP5GI1/ATP5GJ1/ATP5GK1/ATP5GL1/ATP5GM1/ATP5GN1/ATP5GO1/ATP5GP1/ATP5GQ1/ATP5GR1/ATP5GS1/ATP5GT1/ATP5GU1/ATP5GV1/ATP5GW1/ATP5GX1/ATP5GY1/ATP5GZ1/ATP5HA1/ATP5HB1/ATP5HC1/ATP5HD1/ATP5HE1/ATP5HF1/ATP5HG1/ATP5HI1/ATP5HJ1/ATP5HK1/ATP5HL1/ATP5HM1/ATP5HN1/ATP5HO1/ATP5HP1/ATP5HQ1/ATP5HR1/ATP5HS1/ATP5HT1/ATP5HU1/ATP5HV1/ATP5HW1/ATP5HX1/ATP5HY1/ATP5HZ1/ATP5IA1/ATP5IB1/ATP5IC1/ATP5ID1/ATP5IE1/ATP5IF1/ATP5IG1/ATP5IH1/ATP5IJ1/ATP5IK1/ATP5IL1/ATP5IM1/ATP5IN1/ATP5IO1/ATP5IP1/ATP5IQ1/ATP5IR1/ATP5IS1/ATP5IT1/ATP5IU1/ATP5IV1/ATP5IW1/ATP5IX1/ATP5IY1/ATP5IZ1/ATP5JA1/ATP5JB1/ATP5JC1/ATP5JD1/ATP5JE1/ATP5JF1/ATP5JG1/ATP5JH1/ATP5JI1/ATP5JJ1/ATP5JK1/ATP5JL1/ATP5JM1/ATP5JN1/ATP5JO1/ATP5JP1/ATP5JQ1/ATP5JR1/ATP5JS1/ATP5JT1/ATP5JU1/ATP5JV1/ATP5JW1/ATP5JX1/ATP5JY1/ATP5JZ1/ATP5KA1/ATP5KB1/ATP5KC1/ATP5KD1/ATP5KE1/ATP5KF1/ATP5KG1/ATP5KH1/ATP5KI1/ATP5KJ1/ATP5KK1/ATP5KL1/ATP5KM1/ATP5KN1/ATP5KO1/ATP5KP1/ATP5KQ1/ATP5KR1/ATP5KS1/ATP5KT1/ATP5KU1/ATP5KV1/ATP5KW1/ATP5KX1/ATP5KY1/ATP5KZ2/ATP5LA1/ATP5LB1/ATP5LC1/ATP5LD1/ATP5LE1/ATP5LF1/ATP5LG1/ATP5LH1/ATP5LI1/ATP5LJ1/ATP5LK1/ATP5LL1/ATP5LM1/ATP5LN1/ATP5LO1/ATP5LP1/ATP5LQ1/ATP5LR1/ATP5LS1/ATP5LT1/ATP5LU1/ATP5LV1/ATP5LW1/ATP5LX1/ATP5LY1/ATP5LZ1/ATP5MA1/ATP5MB1/ATP5MC1/ATP5MD1/ATP5ME1/ATP5MF1/ATP5MG1/ATP5MH1/ATP5MI1/ATP5MJ1/ATP5MK1/ATP5ML1/ATP5MN1/ATP5MO1/ATP5MP1/ATP5MQ1/ATP5MR1/ATP5MS1/ATP5MT1/ATP5MU1/ATP5MV1/ATP5MW1/ATP5MX1/ATP5MY1/ATP5MZ1/ATP5NA1/ATP5NB1/ATP5NC1/ATP5ND1/ATP5NE1/ATP5NF1/ATP5NG1/ATP5NH1/ATP5NI1/ATP5NJ1/ATP5NK1/ATP5NL1/ATP5NM1/ATP5NO1/ATP5NP1/ATP5NQ1/ATP5NR1/ATP5NS1/ATP5NT1/ATP5NU1/ATP5NV1/ATP5NW1/ATP5NX1/ATP5NY1/ATP5NZ3/ATP5OA1/ATP5OB1/ATP5OC1/ATP5OD1/ATP5OE1/ATP5OF1/ATP5OG1/ATP5OH1/ATP5OI1/ATP5OJ1/ATP5OK1/ATP5OL1/ATP5OM1/ATP5ON1/ATP5OO1/ATP5OP1/ATP5OQ1/ATP5OR1/ATP5OS1/ATP5OT1/ATP5OU1/ATP5OV1/ATP5OW1/ATP5OX1/ATP5OY1/ATP5OZ3/ATP5PA1/ATP5PB1/ATP5PC1/ATP5PD1/ATP5PE1/ATP5PF1/ATP5PG1/ATP5PH1/ATP5PI1/ATP5PJ1/ATP5PK1/ATP5PL1/ATP5PM1/ATP5PN1/ATP5PO1/ATP5PP1/ATP5PQ1/ATP5PR1/ATP5PS1/ATP5PT1/ATP5PU1/ATP5PV1/ATP5PW1/ATP5PX1/ATP5PY1/ATP5PZ3/ATP5QA1/ATP5QB1/ATP5QC1/ATP5QD1/ATP5QE1/ATP5QF1/ATP5QG1/ATP5QH1/ATP5QI1/ATP5QJ1/ATP5QK1/ATP5QL1/ATP5QM1/ATP5QN1/ATP5QO1/ATP5QP1/ATP5QQ1/ATP5QR1/ATP5QS1/ATP5QT1/ATP5QU1/ATP5QV1/ATP5QW1/ATP5QX1/ATP5QY1/ATP5QZ3/ATP5RA1/ATP5RB1/ATP5RC1/ATP5RD1/ATP5RE1/ATP5RF1/ATP5RG1/ATP5RH1/ATP5RI1/ATP5RJ1/ATP5RK1/ATP5RL1/ATP5RM1/ATP5RN1/ATP5RO1/ATP5RP1/ATP5RQ1/ATP5RR1/ATP5RS1/ATP5RT1/ATP5RU1/ATP5RV1/ATP5RW1/ATP5RX1/ATP5RY1/ATP5RZ3/ATP5SA1/ATP5SB1/ATP5SC1/ATP5SD1/ATP5SE1/ATP5SF1/ATP5SG1/ATP5SH1/ATP5SI1/ATP5SJ1/ATP5SK1/ATP5SL1/ATP5SM1/ATP5SN1/ATP5SO1/ATP5SP1/ATP5SQ1/ATP5SR1/ATP5SS1/ATP5ST1/ATP5SU1/ATP5SV1/ATP5SW1/ATP5SX1/ATP5SY1/ATP5SZ3/ATP5TA1/ATP5TB1/ATP5TC1/ATP5TD1/ATP5TE1/ATP5TF1/ATP5TG1/ATP5TH1/ATP5TI1/ATP5TJ1/ATP5TK1/ATP5TL1/ATP5TM1/ATP5TN1/ATP5TO1/ATP5TP1/ATP5TQ1/ATP5TR1/ATP5TS1/ATP5TT1/ATP5TU1/ATP5TV1/ATP5TW1/ATP5TX1/ATP5TY1/ATP5TZ3/ATP5UA1/ATP5UB1/ATP5UC1/ATP5UD1/ATP5UE1/ATP5UF1/ATP5UG1/ATP5UH1/ATP5UI1/ATP5UJ1/ATP5UK1/ATP5UL1/ATP5UM1/ATP5UN1/ATP5UO1/ATP5UP1/ATP5UQ1/ATP5UR1/ATP5US1/ATP5UT1/ATP5UU1/ATP5UV1/ATP5UW1/ATP5UX1/ATP5UY1/ATP5UZ3/ATP5VA1/ATP5VB1/ATP5VC1/ATP5VD1/ATP5VE1/ATP5VF1/ATP5VG1/ATP5VH1/ATP5VI1/ATP5VJ1/ATP5VK1/ATP5VL1/ATP5VM1/ATP5VN1/ATP5VO1/ATP5VP1/ATP5VQ1/ATP5VR1/ATP5VS1/ATP5VT1/ATP5VU1/ATP5VV1/ATP5VW1/ATP5VX1/ATP5VY1/ATP5VZ3/ATP5WA1/ATP5WB1/ATP5WC1/ATP5WD1/ATP5WE1/ATP5WF1/ATP5WG1/ATP5WH1/ATP5WI1/ATP5WJ1/ATP5WK1/ATP5WL1/ATP5WM1/ATP5WN1/ATP5WO1/ATP5WP1/ATP5WQ1/ATP5WR1/ATP5WS1/ATP5WT1/ATP5WU1/ATP5WV1/ATP5WW1/ATP5WX1/ATP5WY1/ATP5WZ3/ATP5XA1/ATP5XB1/ATP5XC1/ATP5XD1/ATP5XE1/ATP5XF1/ATP5XG1/ATP5XH1/ATP5XI1/ATP5XJ1/ATP5XK1/ATP5XL1/ATP5XM1/ATP5XN1/ATP5XO1/ATP5XP1/ATP5XQ1/ATP5XR1/ATP5XS1/ATP5XT1/ATP5XU1/ATP5XV1/ATP5XW1/ATP5XX1/ATP5XY1/ATP5XZ3/ATP5YA1/ATP5YB1/ATP5YC1/ATP5YD1/ATP5YE1/ATP5YF1/ATP5YG1/ATP5YH1/ATP5YI1/ATP5YJ1/ATP5YK1/ATP5YL1/ATP5YM1/ATP5YN1/ATP5YO1/ATP5YP1/ATP5YQ1/ATP5YR1/ATP5YS1/ATP5YT1/ATP5YU1/ATP5YV1/ATP5YW1/ATP5YX1/ATP5YY1/ATP5YZ3/ATP5ZA1/ATP5ZB1/ATP5ZC1/ATP5ZD1/ATP5ZE1/ATP5ZF1/ATP5ZG1/ATP5ZH1/ATP5ZI1/ATP5ZJ1/ATP5ZK1/ATP5ZL1/ATP5ZM1/ATP5ZN1/ATP5ZO1/ATP5ZP1/ATP5ZQ1/ATP5ZR1/ATP5ZS1/ATP5ZT1/ATP5ZU1/ATP5ZV1/ATP5ZW1/ATP5ZX1/ATP5ZY1/ATP5ZZ3 |    |
