# Supplementary material
Source: PubMed Central journal article supplement (PMC9484382)
Supplement: gutjnl-2021-324994supp016.pdf [file gutjnl-2021-324994supp016.pdf]

Supplementary Table 5.xlsx

| GN     | UNIPROT | UNIPROT_ID  | baseMean    | log2FoldChange | fcSE        | stat        | pvalue      | padj        | Description                                 | OS                   | OX   | ENTREZID | Subcellular main location     | Subcellular additional location | Present in 4 cell lines |
|--------|---------|-------------|-------------|----------------|-------------|-------------|-------------|-------------|---------------------------------------------|----------------------|------|----------|-------------------------------|---------------------------------|-------------------------|
| ARPC4  | P59998  | ARPC4_HUMAN | 0.085315617 | 0.640018482    | 3.086673275 | 0.207348956 | 0.835737343 | 0.995451239 | Actin-related protein 2/3 complex subunit 4 | Homo sapiens (Human) | 9606 | 10093    |                               |                                 | Non                     |
| PSME3  | P61289  | PSME3_HUMAN | 0.085315617 | 0.640018482    | 3.086673275 | 0.207348956 | 0.835737343 | 0.995451239 | Proteasome activator complex subunit 3      | Homo sapiens (Human) | 9606 | 10197    | Nucleoplasm                   |                                 | Non                     |
| RPS11  | P62280  | RPS11_HUMAN | 0.085315617 | 0.640018482    | 3.086673275 | 0.207348956 | 0.835737343 | 0.995451239 | 40S ribosomal protein S11                   | Homo sapiens (Human) | 9606 | 6205     | Cytosol;Endoplasmic reticulum | Nucleoli                        | Non                     |
| RPL10A | P62906  | RL10A_HUMAN | 0.085315617 | 0.640018482    | 3.086673275 | 0.207348956 | 0.835737343 | 0.995451239 | 60S ribosomal protein L10a                  | Homo sapiens (Human) | 9606 | 4736     | Cytosol;Endoplasmic reticulum | Nucleoli                        | Non                     |
| RPL11  | P62913  | RL11_HUMAN  | 0.085315617 | 0.640018482    | 3.086673275 | 0.207348956 | 0.835737343 | 0.995451239 | 60S ribosomal protein L11                   | Homo sapiens (Human) | 9606 | 6135     | Vesicles                      |                                 | Non                     |
