# Supplementary material
Source: PubMed Central journal article supplement (PMC9484382)
Supplement: gutjnl-2021-324994supp017.pdf [file gutjnl-2021-324994supp017.pdf]

Supplementary Table 6. Baseline demographic and clinical characteristics of the study population in the longitudinal analysis of serum agrin-positive exosomes (n=44).

| <b>Cohort characteristics</b>      | <b>PDAC (n/%)</b> |
|------------------------------------|-------------------|
| <b>Sex</b>                         |                   |
| Male                               | 26 (59.1)         |
| Female                             | 18 (40.9)         |
| <b>Age, years (mean±SD)</b>        | 70.0 ± 8.6        |
| <b>Stage</b>                       |                   |
| IA                                 | 4 (9.1)           |
| IB                                 | 4 (9.1)           |
| IIA                                | 1 (2.3)           |
| IIB                                | 9 (20.5)          |
| III                                | 9 (20.5)          |
| IV                                 | 17 (38.6)         |
| <b>Surgery</b>                     | 19 (43.2)         |
| <b>Stage</b>                       |                   |
| IA                                 | 3 (15.8)          |
| IB                                 | 2 (10.5)          |
| IIA                                | 1 (5.3)           |
| IIB                                | 7 (36.8)          |
| III                                | 5 (26.3)          |
| IV                                 | 1 (5.3)           |
| <b>Chemotherapy</b>                | 21 (47.7)         |
| <b>Folfinox-based regimens</b>     | 12 (27.3)*        |
| <b>Stage</b>                       |                   |
| IA                                 | 1 (8.3)           |
| IB                                 | 1 (8.3)           |
| IIA                                | 0 (0)             |
| IIB                                | 3 (25.0)          |
| III                                | 2 (16.7)          |
| IV                                 | 5 (41.7)          |
| <b>Non-folfinox-based regimens</b> | 11 (25.0)*        |
| <b>Stage</b>                       |                   |
| IA                                 | 0 (0)             |
| IB                                 | 1 (9.1)           |
| IIA                                | 0 (0)             |
| IIB                                | 3 (27.3)          |
| III                                | 4 (36.4)          |
| IV                                 | 3 (27.3)          |

PDAC – Pancreatic Ductal Adenocarcinoma; SD – Standard Deviation

\*2 patients included in this cohort were submitted to folfinox and non-folfinox-based regimens
