# Supplementary material
Source: PubMed Central journal article supplement (PMC9484382)
Supplement: gutjnl-2021-324994supp018.pdf [file gutjnl-2021-324994supp018.pdf]

Supplementary Table 7. Baseline demographic and clinical characteristics of the study population in the correlation between serum agrin-positive exosomes and serum CD133-positive exosomes (n=106).

| <b>Cohort characteristics</b> | <b>PDAC (n/%)</b> |
|-------------------------------|-------------------|
| <b>Sex</b>                    |                   |
| Male                          | 58 (54.7)         |
| Female                        | 48 (45.3)         |
| <b>Age, years (mean±SD)</b>   | 68.2 ± 10.4       |
| <b>Stage</b>                  |                   |
| IA                            | 6 (5.7)           |
| IB                            | 17 (16.0)         |
| IIA                           | 5 (4.7)           |
| IIB                           | 11 (10.4)         |
| III                           | 32 (30.2)         |
| IV                            | 35 (33.0)         |

PDAC – Pancreatic Ductal Adenocarcinoma; SD – Standard Deviation
